# Supplementary material for: High-throughput and data-driven search for stable optoelectronic AMSe3 materials
Source: Royal Society of Chemistry journal article supplement (doi:10.1039/d4ta08867k), 2025-01-01
Supplement: d4ta08867k2.xlsx [file d4ta08867k2.xlsx]

## Sheet: AMSe3_with_magpieFea
A	A_HOMO	A_LUMO	A_MullikenEN	A_Energy	A_OS	A_VWR	A_MV	A_YM	A_ARC	A_TC	A_IR	A_ionEner	A_AtomicVolume	A_ShearModulus	A_HHIr	A_SpaceGroupNumber	A_HeatCapacityMolar	A_MeltingT	A_BulkModulus	A_ZungerPP-r-s	A_ZungerPP-r-d	A_IsMetalloid	A_NUnfilled	A_HeatFusion	A_HeatCapacityMass	A_IsAlkali	A_ElectronAffinity	A_MiracleRadius	A_GSestFCClatcnt	A_NfUnfilled	A_ZungerPP-r-sigma	A_NpUnfilled	A_phi	A_GSbandgap	A_BoilingTemp	A_Density	A_IsFBlock	A_ICSDVolume	A_IsDBlock	A_GsvolumePa	A_FusionEnthalpy	A_GSmagmom	A_n_ws^third	A_NsValence	A_NdUnfilled	A_NfValence	A_GSenergyPa	A_Row	A_GSestBCClatcnt
Li	-2.874	-1.09	3.00461	-1.90797	1	1.82	13.02	4.9	1.67	85	0.9	5.39171	21.5441	4.2	4200	229	24.86	453.69	11	0.985	0.40748040455120105	0	1	3	3.582	1	59.6	152	4.04885	0	1.61	0	2.85	0	1615	535	0	21.63	0	16.5933	3	0	0.98	1	0	0	-1.86989	2	3.21357
Li	-2.874	-1.09	3.00461	-1.90797	1	1.82	13.02	4.9	1.67	85	0.9	5.39171	21.5441	4.2	4200	229	24.86	453.69	11	0.985	0.40748040455120105	0	1	3	3.582	1	59.6	152	4.04885	0	1.61	0	2.85	0	1615	535	0	21.63	0	16.5933	3	0	0.98	1	0	0	-1.86989	2	3.21357
Li	-2.874	-1.09	3.00461	-1.90797	1	1.82	13.02	4.9	1.67	85	0.9	5.39171	21.5441	4.2	4200	229	24.86	453.69	11	0.985	0.40748040455120105	0	1	3	3.582	1	59.6	152	4.04885	0	1.61	0	2.85	0	1615	535	0	21.63	0	16.5933	3	0	0.98	1	0	0	-1.86989	2	3.21357
Li	-2.874	-1.09	3.00461	-1.90797	1	1.82	13.02	4.9	1.67	85	0.9	5.39171	21.5441	4.2	4200	229	24.86	453.69	11	0.985	0.40748040455120105	0	1	3	3.582	1	59.6	152	4.04885	0	1.61	0	2.85	0	1615	535	0	21.63	0	16.5933	3	0	0.98	1	0	0	-1.86989	2	3.21357
Li	-2.874	-1.09	3.00461	-1.90797	1	1.82	13.02	4.9	1.67	85	0.9	5.39171	21.5441	4.2	4200	229	24.86	453.69	11	0.985	0.40748040455120105	0	1	3	3.582	1	59.6	152	4.04885	0	1.61	0	2.85	0	1615	535	0	21.63	0	16.5933	3	0	0.98	1	0	0	-1.86989	2	3.21357
Na	-2.747	-0.732	2.84345	-1.31259	1	2.27	23.78	10	1.9	140	1.16	5.13908	39.4383	3.3	500	229	28.23	370.87	6.3	1.1	0.40748040455120105	0	1	2.6	1.228	1	52.8	180	4.8906	0	2.65	0	2.7	0	1156	968	0	39.76	0	29.2433	2.6	0	0.82	1	0	0	-1.26024	3	3.88167
Na	-2.747	-0.732	2.84345	-1.31259	1	2.27	23.78	10	1.9	140	1.16	5.13908	39.4383	3.3	500	229	28.23	370.87	6.3	1.1	0.40748040455120105	0	1	2.6	1.228	1	52.8	180	4.8906	0	2.65	0	2.7	0	1156	968	0	39.76	0	29.2433	2.6	0	0.82	1	0	0	-1.26024	3	3.88167
Na	-2.747	-0.732	2.84345	-1.31259	1	2.27	23.78	10	1.9	140	1.16	5.13908	39.4383	3.3	500	229	28.23	370.87	6.3	1.1	0.40748040455120105	0	1	2.6	1.228	1	52.8	180	4.8906	0	2.65	0	2.7	0	1156	968	0	39.76	0	29.2433	2.6	0	0.82	1	0	0	-1.26024	3	3.88167
Na	-2.747	-0.732	2.84345	-1.31259	1	2.27	23.78	10	1.9	140	1.16	5.13908	39.4383	3.3	500	229	28.23	370.87	6.3	1.1	0.40748040455120105	0	1	2.6	1.228	1	52.8	180	4.8906	0	2.65	0	2.7	0	1156	968	0	39.76	0	29.2433	2.6	0	0.82	1	0	0	-1.26024	3	3.88167
Na	-2.747	-0.732	2.84345	-1.31259	1	2.27	23.78	10	1.9	140	1.16	5.13908	39.4383	3.3	500	229	28.23	370.87	6.3	1.1	0.40748040455120105	0	1	2.6	1.228	1	52.8	180	4.8906	0	2.65	0	2.7	0	1156	968	0	39.76	0	29.2433	2.6	0	0.82	1	0	0	-1.26024	3	3.88167
Na	-2.747	-0.732	2.84345	-1.31259	1	2.27	23.78	10	1.9	140	1.16	5.13908	39.4383	3.3	500	229	28.23	370.87	6.3	1.1	0.40748040455120105	0	1	2.6	1.228	1	52.8	180	4.8906	0	2.65	0	2.7	0	1156	968	0	39.76	0	29.2433	2.6	0	0.82	1	0	0	-1.26024	3	3.88167
K	-2.33	-0.793	2.4211	-1.11033	1	2.75	45.94	78	2.43	100	1.52	4.34066	75.8479	1.3	7200	229	29.6	336.53	3.1	1.54	0.37	0	1	2.335	0.757	1	48.4	230	6.63752	0	3.69	0	2.25	0	1032	856	0	75.63	0	73.1067	2.335	0	0.65	1	0	0	-1.09754	4	5.2682
K	-2.33	-0.793	2.4211	-1.11033	1	2.75	45.94	78	2.43	100	1.52	4.34066	75.8479	1.3	7200	229	29.6	336.53	3.1	1.54	0.37	0	1	2.335	0.757	1	48.4	230	6.63752	0	3.69	0	2.25	0	1032	856	0	75.63	0	73.1067	2.335	0	0.65	1	0	0	-1.09754	4	5.2682
K	-2.33	-0.793	2.4211	-1.11033	1	2.75	45.94	78	2.43	100	1.52	4.34066	75.8479	1.3	7200	229	29.6	336.53	3.1	1.54	0.37	0	1	2.335	0.757	1	48.4	230	6.63752	0	3.69	0	2.25	0	1032	856	0	75.63	0	73.1067	2.335	0	0.65	1	0	0	-1.09754	4	5.2682
K	-2.33	-0.793	2.4211	-1.11033	1	2.75	45.94	78	2.43	100	1.52	4.34066	75.8479	1.3	7200	229	29.6	336.53	3.1	1.54	0.37	0	1	2.335	0.757	1	48.4	230	6.63752	0	3.69	0	2.25	0	1032	856	0	75.63	0	73.1067	2.335	0	0.65	1	0	0	-1.09754	4	5.2682
K	-2.33	-0.793	2.4211	-1.11033	1	2.75	45.94	78	2.43	100	1.52	4.34066	75.8479	1.3	7200	229	29.6	336.53	3.1	1.54	0.37	0	1	2.335	0.757	1	48.4	230	6.63752	0	3.69	0	2.25	0	1032	856	0	75.63	0	73.1067	2.335	0	0.65	1	0	0	-1.09754	4	5.2682
Rb	-2.246	-0.734	2.33145	-1.01653	1	3.03	55.76	2.4	2.65	58	1.66	4.17713	92.641	64.50420054200542	6000	229	31.06	312.46	2.5	1.67	0.71	0	1	2.19	0.363	1	46.9	244	7.13277	0	4.1	0	2.1	0	961	1532	0	93.09	0	90.7225	2.19	0	0.6	1	0	0	-0.963335	5	5.66128
Rb	-2.246	-0.734	2.33145	-1.01653	1	3.03	55.76	2.4	2.65	58	1.66	4.17713	92.641	64.50420054200542	6000	229	31.06	312.46	2.5	1.67	0.71	0	1	2.19	0.363	1	46.9	244	7.13277	0	4.1	0	2.1	0	961	1532	0	93.09	0	90.7225	2.19	0	0.6	1	0	0	-0.963335	5	5.66128
Rb	-2.246	-0.734	2.33145	-1.01653	1	3.03	55.76	2.4	2.65	58	1.66	4.17713	92.641	64.50420054200542	6000	229	31.06	312.46	2.5	1.67	0.71	0	1	2.19	0.363	1	46.9	244	7.13277	0	4.1	0	2.1	0	961	1532	0	93.09	0	90.7225	2.19	0	0.6	1	0	0	-0.963335	5	5.66128
Rb	-2.246	-0.734	2.33145	-1.01653	1	3.03	55.76	2.4	2.65	58	1.66	4.17713	92.641	64.50420054200542	6000	229	31.06	312.46	2.5	1.67	0.71	0	1	2.19	0.363	1	46.9	244	7.13277	0	4.1	0	2.1	0	961	1532	0	93.09	0	90.7225	2.19	0	0.6	1	0	0	-0.963335	5	5.66128
Rb	-2.246	-0.734	2.33145	-1.01653	1	3.03	55.76	2.4	2.65	58	1.66	4.17713	92.641	64.50420054200542	6000	229	31.06	312.46	2.5	1.67	0.71	0	1	2.19	0.363	1	46.9	244	7.13277	0	4.1	0	2.1	0	961	1532	0	93.09	0	90.7225	2.19	0	0.6	1	0	0	-0.963335	5	5.66128
Rb	-2.246	-0.734	2.33145	-1.01653	1	3.03	55.76	2.4	2.65	58	1.66	4.17713	92.641	64.50420054200542	6000	229	31.06	312.46	2.5	1.67	0.71	0	1	2.19	0.363	1	46.9	244	7.13277	0	4.1	0	2.1	0	961	1532	0	93.09	0	90.7225	2.19	0	0.6	1	0	0	-0.963335	5	5.66128
Cs	-2.109	-0.722	2.182	-0.8588	1	3.43	70.94	1.7	2.98	36	1.81	3.89391	117.456	64.50420054200542	6000	229	32.21	301.59	1.6	1.71	0.40748040455120105	0	1	2.09	0.242	1	45.5	264	7.73652	0	4.31	0	1.95	0	944	1879	0	67.55	0	115.765	2.09	0	0.55	1	0	0	-0.854626	6	6.14048
Cs	-2.109	-0.722	2.182	-0.8588	1	3.43	70.94	1.7	2.98	36	1.81	3.89391	117.456	64.50420054200542	6000	229	32.21	301.59	1.6	1.71	0.40748040455120105	0	1	2.09	0.242	1	45.5	264	7.73652	0	4.31	0	1.95	0	944	1879	0	67.55	0	115.765	2.09	0	0.55	1	0	0	-0.854626	6	6.14048
Cs	-2.109	-0.722	2.182	-0.8588	1	3.43	70.94	1.7	2.98	36	1.81	3.89391	117.456	64.50420054200542	6000	229	32.21	301.59	1.6	1.71	0.40748040455120105	0	1	2.09	0.242	1	45.5	264	7.73652	0	4.31	0	1.95	0	944	1879	0	67.55	0	115.765	2.09	0	0.55	1	0	0	-0.854626	6	6.14048
Cs	-2.109	-0.722	2.182	-0.8588	1	3.43	70.94	1.7	2.98	36	1.81	3.89391	117.456	64.50420054200542	6000	229	32.21	301.59	1.6	1.71	0.40748040455120105	0	1	2.09	0.242	1	45.5	264	7.73652	0	4.31	0	1.95	0	944	1879	0	67.55	0	115.765	2.09	0	0.55	1	0	0	-0.854626	6	6.14048
Cs	-2.109	-0.722	2.182	-0.8588	1	3.43	70.94	1.7	2.98	36	1.81	3.89391	117.456	64.50420054200542	6000	229	32.21	301.59	1.6	1.71	0.40748040455120105	0	1	2.09	0.242	1	45.5	264	7.73652	0	4.31	0	1.95	0	944	1879	0	67.55	0	115.765	2.09	0	0.55	1	0	0	-0.854626	6	6.14048
Cs	-2.109	-0.722	2.182	-0.8588	1	3.43	70.94	1.7	2.98	36	1.81	3.89391	117.456	64.50420054200542	6000	229	32.21	301.59	1.6	1.71	0.40748040455120105	0	1	2.09	0.242	1	45.5	264	7.73652	0	4.31	0	1.95	0	944	1879	0	67.55	0	115.765	2.09	0	0.55	1	0	0	-0.854626	6	6.14048
Be	-5.61	-2.017	4.56755	-3.7426	2	1.53	4.85	287	1.12	190	0.59	18.2111	8.09818	132	4000	194	16.443	1560	130	0.64	0.40748040455120105	0	0	7.895	1.825	1	0	112	3.16018	0	1.08	0	5.05	0	2743	1848	0	8.11	0	7.89	7.895	0	1.67	2	0	0	-3.75504	2	2.50824
Be	-5.61	-2.017	4.56755	-3.7426	2	1.53	4.85	287	1.12	190	0.59	18.2111	8.09818	132	4000	194	16.443	1560	130	0.64	0.40748040455120105	0	0	7.895	1.825	1	0	112	3.16018	0	1.08	0	5.05	0	2743	1848	0	8.11	0	7.89	7.895	0	1.67	2	0	0	-3.75504	2	2.50824
Be	-5.61	-2.017	4.56755	-3.7426	2	1.53	4.85	287	1.12	190	0.59	18.2111	8.09818	132	4000	194	16.443	1560	130	0.64	0.40748040455120105	0	0	7.895	1.825	1	0	112	3.16018	0	1.08	0	5.05	0	2743	1848	0	8.11	0	7.89	7.895	0	1.67	2	0	0	-3.75504	2	2.50824
Be	-5.61	-2.017	4.56755	-3.7426	2	1.53	4.85	287	1.12	190	0.59	18.2111	8.09818	132	4000	194	16.443	1560	130	0.64	0.40748040455120105	0	0	7.895	1.825	1	0	112	3.16018	0	1.08	0	5.05	0	2743	1848	0	8.11	0	7.89	7.895	0	1.67	2	0	0	-3.75504	2	2.50824
Be	-5.61	-2.017	4.56755	-3.7426	2	1.53	4.85	287	1.12	190	0.59	18.2111	8.09818	132	4000	194	16.443	1560	130	0.64	0.40748040455120105	0	0	7.895	1.825	1	0	112	3.16018	0	1.08	0	5.05	0	2743	1848	0	8.11	0	7.89	7.895	0	1.67	2	0	0	-3.75504	2	2.50824
Be	-5.61	-2.017	4.56755	-3.7426	2	1.53	4.85	287	1.12	190	0.59	18.2111	8.09818	132	4000	194	16.443	1560	130	0.64	0.40748040455120105	0	0	7.895	1.825	1	0	112	3.16018	0	1.08	0	5.05	0	2743	1848	0	8.11	0	7.89	7.895	0	1.67	2	0	0	-3.75504	2	2.50824
Be	-5.61	-2.017	4.56755	-3.7426	2	1.53	4.85	287	1.12	190	0.59	18.2111	8.09818	132	4000	194	16.443	1560	130	0.64	0.40748040455120105	0	0	7.895	1.825	1	0	112	3.16018	0	1.08	0	5.05	0	2743	1848	0	8.11	0	7.89	7.895	0	1.67	2	0	0	-3.75504	2	2.50824
Be	-5.61	-2.017	4.56755	-3.7426	2	1.53	4.85	287	1.12	190	0.59	18.2111	8.09818	132	4000	194	16.443	1560	130	0.64	0.40748040455120105	0	0	7.895	1.825	1	0	112	3.16018	0	1.08	0	5.05	0	2743	1848	0	8.11	0	7.89	7.895	0	1.67	2	0	0	-3.75504	2	2.50824
Be	-5.61	-2.017	4.56755	-3.7426	2	1.53	4.85	287	1.12	190	0.59	18.2111	8.09818	132	4000	194	16.443	1560	130	0.64	0.40748040455120105	0	0	7.895	1.825	1	0	112	3.16018	0	1.08	0	5.05	0	2743	1848	0	8.11	0	7.89	7.895	0	1.67	2	0	0	-3.75504	2	2.50824
Be	-5.61	-2.017	4.56755	-3.7426	2	1.53	4.85	287	1.12	190	0.59	18.2111	8.09818	132	4000	194	16.443	1560	130	0.64	0.40748040455120105	0	0	7.895	1.825	1	0	112	3.16018	0	1.08	0	5.05	0	2743	1848	0	8.11	0	7.89	7.895	0	1.67	2	0	0	-3.75504	2	2.50824
Be	-5.61	-2.017	4.56755	-3.7426	2	1.53	4.85	287	1.12	190	0.59	18.2111	8.09818	132	4000	194	16.443	1560	130	0.64	0.40748040455120105	0	0	7.895	1.825	1	0	112	3.16018	0	1.08	0	5.05	0	2743	1848	0	8.11	0	7.89	7.895	0	1.67	2	0	0	-3.75504	2	2.50824
Be	-5.61	-2.017	4.56755	-3.7426	2	1.53	4.85	287	1.12	190	0.59	18.2111	8.09818	132	4000	194	16.443	1560	130	0.64	0.40748040455120105	0	0	7.895	1.825	1	0	112	3.16018	0	1.08	0	5.05	0	2743	1848	0	8.11	0	7.89	7.895	0	1.67	2	0	0	-3.75504	2	2.50824
Be	-5.61	-2.017	4.56755	-3.7426	2	1.53	4.85	287	1.12	190	0.59	18.2111	8.09818	132	4000	194	16.443	1560	130	0.64	0.40748040455120105	0	0	7.895	1.825	1	0	112	3.16018	0	1.08	0	5.05	0	2743	1848	0	8.11	0	7.89	7.895	0	1.67	2	0	0	-3.75504	2	2.50824
Be	-5.61	-2.017	4.56755	-3.7426	2	1.53	4.85	287	1.12	190	0.59	18.2111	8.09818	132	4000	194	16.443	1560	130	0.64	0.40748040455120105	0	0	7.895	1.825	1	0	112	3.16018	0	1.08	0	5.05	0	2743	1848	0	8.11	0	7.89	7.895	0	1.67	2	0	0	-3.75504	2	2.50824
Be	-5.61	-2.017	4.56755	-3.7426	2	1.53	4.85	287	1.12	190	0.59	18.2111	8.09818	132	4000	194	16.443	1560	130	0.64	0.40748040455120105	0	0	7.895	1.825	1	0	112	3.16018	0	1.08	0	5.05	0	2743	1848	0	8.11	0	7.89	7.895	0	1.67	2	0	0	-3.75504	2	2.50824
Be	-5.61	-2.017	4.56755	-3.7426	2	1.53	4.85	287	1.12	190	0.59	18.2111	8.09818	132	4000	194	16.443	1560	130	0.64	0.40748040455120105	0	0	7.895	1.825	1	0	112	3.16018	0	1.08	0	5.05	0	2743	1848	0	8.11	0	7.89	7.895	0	1.67	2	0	0	-3.75504	2	2.50824
Be	-5.61	-2.017	4.56755	-3.7426	2	1.53	4.85	287	1.12	190	0.59	18.2111	8.09818	132	4000	194	16.443	1560	130	0.64	0.40748040455120105	0	0	7.895	1.825	1	0	112	3.16018	0	1.08	0	5.05	0	2743	1848	0	8.11	0	7.89	7.895	0	1.67	2	0	0	-3.75504	2	2.50824
Mg	-4.706	-1.328	3.71405	-1.60433	2	1.73	14	45	1.45	160	0.86	15.0353	23.2223	17	500	194	24.869	923	45	0.9	0.40748040455120105	0	0	8.48	1.023	1	0	160	4.50715	0	2.03	0	3.45	0	1363	1738	0	23.48	0	22.89	8.48	0	1.17	2	0	0	-1.54227	3	3.57733
Mg	-4.706	-1.328	3.71405	-1.60433	2	1.73	14	45	1.45	160	0.86	15.0353	23.2223	17	500	194	24.869	923	45	0.9	0.40748040455120105	0	0	8.48	1.023	1	0	160	4.50715	0	2.03	0	3.45	0	1363	1738	0	23.48	0	22.89	8.48	0	1.17	2	0	0	-1.54227	3	3.57733
Mg	-4.706	-1.328	3.71405	-1.60433	2	1.73	14	45	1.45	160	0.86	15.0353	23.2223	17	500	194	24.869	923	45	0.9	0.40748040455120105	0	0	8.48	1.023	1	0	160	4.50715	0	2.03	0	3.45	0	1363	1738	0	23.48	0	22.89	8.48	0	1.17	2	0	0	-1.54227	3	3.57733
Mg	-4.706	-1.328	3.71405	-1.60433	2	1.73	14	45	1.45	160	0.86	15.0353	23.2223	17	500	194	24.869	923	45	0.9	0.40748040455120105	0	0	8.48	1.023	1	0	160	4.50715	0	2.03	0	3.45	0	1363	1738	0	23.48	0	22.89	8.48	0	1.17	2	0	0	-1.54227	3	3.57733
Mg	-4.706	-1.328	3.71405	-1.60433	2	1.73	14	45	1.45	160	0.86	15.0353	23.2223	17	500	194	24.869	923	45	0.9	0.40748040455120105	0	0	8.48	1.023	1	0	160	4.50715	0	2.03	0	3.45	0	1363	1738	0	23.48	0	22.89	8.48	0	1.17	2	0	0	-1.54227	3	3.57733
Mg	-4.706	-1.328	3.71405	-1.60433	2	1.73	14	45	1.45	160	0.86	15.0353	23.2223	17	500	194	24.869	923	45	0.9	0.40748040455120105	0	0	8.48	1.023	1	0	160	4.50715	0	2.03	0	3.45	0	1363	1738	0	23.48	0	22.89	8.48	0	1.17	2	0	0	-1.54227	3	3.57733
Mg	-4.706	-1.328	3.71405	-1.60433	2	1.73	14	45	1.45	160	0.86	15.0353	23.2223	17	500	194	24.869	923	45	0.9	0.40748040455120105	0	0	8.48	1.023	1	0	160	4.50715	0	2.03	0	3.45	0	1363	1738	0	23.48	0	22.89	8.48	0	1.17	2	0	0	-1.54227	3	3.57733
Mg	-4.706	-1.328	3.71405	-1.60433	2	1.73	14	45	1.45	160	0.86	15.0353	23.2223	17	500	194	24.869	923	45	0.9	0.40748040455120105	0	0	8.48	1.023	1	0	160	4.50715	0	2.03	0	3.45	0	1363	1738	0	23.48	0	22.89	8.48	0	1.17	2	0	0	-1.54227	3	3.57733
Mg	-4.706	-1.328	3.71405	-1.60433	2	1.73	14	45	1.45	160	0.86	15.0353	23.2223	17	500	194	24.869	923	45	0.9	0.40748040455120105	0	0	8.48	1.023	1	0	160	4.50715	0	2.03	0	3.45	0	1363	1738	0	23.48	0	22.89	8.48	0	1.17	2	0	0	-1.54227	3	3.57733
Mg	-4.706	-1.328	3.71405	-1.60433	2	1.73	14	45	1.45	160	0.86	15.0353	23.2223	17	500	194	24.869	923	45	0.9	0.40748040455120105	0	0	8.48	1.023	1	0	160	4.50715	0	2.03	0	3.45	0	1363	1738	0	23.48	0	22.89	8.48	0	1.17	2	0	0	-1.54227	3	3.57733
Mg	-4.706	-1.328	3.71405	-1.60433	2	1.73	14	45	1.45	160	0.86	15.0353	23.2223	17	500	194	24.869	923	45	0.9	0.40748040455120105	0	0	8.48	1.023	1	0	160	4.50715	0	2.03	0	3.45	0	1363	1738	0	23.48	0	22.89	8.48	0	1.17	2	0	0	-1.54227	3	3.57733
Mg	-4.706	-1.328	3.71405	-1.60433	2	1.73	14	45	1.45	160	0.86	15.0353	23.2223	17	500	194	24.869	923	45	0.9	0.40748040455120105	0	0	8.48	1.023	1	0	160	4.50715	0	2.03	0	3.45	0	1363	1738	0	23.48	0	22.89	8.48	0	1.17	2	0	0	-1.54227	3	3.57733
Mg	-4.706	-1.328	3.71405	-1.60433	2	1.73	14	45	1.45	160	0.86	15.0353	23.2223	17	500	194	24.869	923	45	0.9	0.40748040455120105	0	0	8.48	1.023	1	0	160	4.50715	0	2.03	0	3.45	0	1363	1738	0	23.48	0	22.89	8.48	0	1.17	2	0	0	-1.54227	3	3.57733
Mg	-4.706	-1.328	3.71405	-1.60433	2	1.73	14	45	1.45	160	0.86	15.0353	23.2223	17	500	194	24.869	923	45	0.9	0.40748040455120105	0	0	8.48	1.023	1	0	160	4.50715	0	2.03	0	3.45	0	1363	1738	0	23.48	0	22.89	8.48	0	1.17	2	0	0	-1.54227	3	3.57733
Mg	-4.706	-1.328	3.71405	-1.60433	2	1.73	14	45	1.45	160	0.86	15.0353	23.2223	17	500	194	24.869	923	45	0.9	0.40748040455120105	0	0	8.48	1.023	1	0	160	4.50715	0	2.03	0	3.45	0	1363	1738	0	23.48	0	22.89	8.48	0	1.17	2	0	0	-1.54227	3	3.57733
Mg	-4.706	-1.328	3.71405	-1.60433	2	1.73	14	45	1.45	160	0.86	15.0353	23.2223	17	500	194	24.869	923	45	0.9	0.40748040455120105	0	0	8.48	1.023	1	0	160	4.50715	0	2.03	0	3.45	0	1363	1738	0	23.48	0	22.89	8.48	0	1.17	2	0	0	-1.54227	3	3.57733
Mg	-4.706	-1.328	3.71405	-1.60433	2	1.73	14	45	1.45	160	0.86	15.0353	23.2223	17	500	194	24.869	923	45	0.9	0.40748040455120105	0	0	8.48	1.023	1	0	160	4.50715	0	2.03	0	3.45	0	1363	1738	0	23.48	0	22.89	8.48	0	1.17	2	0	0	-1.54227	3	3.57733
Ca	-3.768	-1.948	2.09255	-2.00251	2	2.31	26.2	20	1.94	200	1.14	11.8717	42.9372	7.4	1500	225	25.929	1115	17	1.32	0.34	0	0	8.54	0.647	1	2.37	201	5.32601	0	3	0	2.55	0	1757	1550	0	44.19	0	37.77	8.54	0	0.91	2	0	0	-1.94833	4	4.22726
Ca	-3.768	-1.948	2.09255	-2.00251	2	2.31	26.2	20	1.94	200	1.14	11.8717	42.9372	7.4	1500	225	25.929	1115	17	1.32	0.34	0	0	8.54	0.647	1	2.37	201	5.32601	0	3	0	2.55	0	1757	1550	0	44.19	0	37.77	8.54	0	0.91	2	0	0	-1.94833	4	4.22726
Ca	-3.768	-1.948	2.09255	-2.00251	2	2.31	26.2	20	1.94	200	1.14	11.8717	42.9372	7.4	1500	225	25.929	1115	17	1.32	0.34	0	0	8.54	0.647	1	2.37	201	5.32601	0	3	0	2.55	0	1757	1550	0	44.19	0	37.77	8.54	0	0.91	2	0	0	-1.94833	4	4.22726
Ca	-3.768	-1.948	2.09255	-2.00251	2	2.31	26.2	20	1.94	200	1.14	11.8717	42.9372	7.4	1500	225	25.929	1115	17	1.32	0.34	0	0	8.54	0.647	1	2.37	201	5.32601	0	3	0	2.55	0	1757	1550	0	44.19	0	37.77	8.54	0	0.91	2	0	0	-1.94833	4	4.22726
Ca	-3.768	-1.948	2.09255	-2.00251	2	2.31	26.2	20	1.94	200	1.14	11.8717	42.9372	7.4	1500	225	25.929	1115	17	1.32	0.34	0	0	8.54	0.647	1	2.37	201	5.32601	0	3	0	2.55	0	1757	1550	0	44.19	0	37.77	8.54	0	0.91	2	0	0	-1.94833	4	4.22726
Ca	-3.768	-1.948	2.09255	-2.00251	2	2.31	26.2	20	1.94	200	1.14	11.8717	42.9372	7.4	1500	225	25.929	1115	17	1.32	0.34	0	0	8.54	0.647	1	2.37	201	5.32601	0	3	0	2.55	0	1757	1550	0	44.19	0	37.77	8.54	0	0.91	2	0	0	-1.94833	4	4.22726
Ca	-3.768	-1.948	2.09255	-2.00251	2	2.31	26.2	20	1.94	200	1.14	11.8717	42.9372	7.4	1500	225	25.929	1115	17	1.32	0.34	0	0	8.54	0.647	1	2.37	201	5.32601	0	3	0	2.55	0	1757	1550	0	44.19	0	37.77	8.54	0	0.91	2	0	0	-1.94833	4	4.22726
Ca	-3.768	-1.948	2.09255	-2.00251	2	2.31	26.2	20	1.94	200	1.14	11.8717	42.9372	7.4	1500	225	25.929	1115	17	1.32	0.34	0	0	8.54	0.647	1	2.37	201	5.32601	0	3	0	2.55	0	1757	1550	0	44.19	0	37.77	8.54	0	0.91	2	0	0	-1.94833	4	4.22726
Ca	-3.768	-1.948	2.09255	-2.00251	2	2.31	26.2	20	1.94	200	1.14	11.8717	42.9372	7.4	1500	225	25.929	1115	17	1.32	0.34	0	0	8.54	0.647	1	2.37	201	5.32601	0	3	0	2.55	0	1757	1550	0	44.19	0	37.77	8.54	0	0.91	2	0	0	-1.94833	4	4.22726
Ca	-3.768	-1.948	2.09255	-2.00251	2	2.31	26.2	20	1.94	200	1.14	11.8717	42.9372	7.4	1500	225	25.929	1115	17	1.32	0.34	0	0	8.54	0.647	1	2.37	201	5.32601	0	3	0	2.55	0	1757	1550	0	44.19	0	37.77	8.54	0	0.91	2	0	0	-1.94833	4	4.22726
Ca	-3.768	-1.948	2.09255	-2.00251	2	2.31	26.2	20	1.94	200	1.14	11.8717	42.9372	7.4	1500	225	25.929	1115	17	1.32	0.34	0	0	8.54	0.647	1	2.37	201	5.32601	0	3	0	2.55	0	1757	1550	0	44.19	0	37.77	8.54	0	0.91	2	0	0	-1.94833	4	4.22726
Ca	-3.768	-1.948	2.09255	-2.00251	2	2.31	26.2	20	1.94	200	1.14	11.8717	42.9372	7.4	1500	225	25.929	1115	17	1.32	0.34	0	0	8.54	0.647	1	2.37	201	5.32601	0	3	0	2.55	0	1757	1550	0	44.19	0	37.77	8.54	0	0.91	2	0	0	-1.94833	4	4.22726
Ca	-3.768	-1.948	2.09255	-2.00251	2	2.31	26.2	20	1.94	200	1.14	11.8717	42.9372	7.4	1500	225	25.929	1115	17	1.32	0.34	0	0	8.54	0.647	1	2.37	201	5.32601	0	3	0	2.55	0	1757	1550	0	44.19	0	37.77	8.54	0	0.91	2	0	0	-1.94833	4	4.22726
Ca	-3.768	-1.948	2.09255	-2.00251	2	2.31	26.2	20	1.94	200	1.14	11.8717	42.9372	7.4	1500	225	25.929	1115	17	1.32	0.34	0	0	8.54	0.647	1	2.37	201	5.32601	0	3	0	2.55	0	1757	1550	0	44.19	0	37.77	8.54	0	0.91	2	0	0	-1.94833	4	4.22726
Ca	-3.768	-1.948	2.09255	-2.00251	2	2.31	26.2	20	1.94	200	1.14	11.8717	42.9372	7.4	1500	225	25.929	1115	17	1.32	0.34	0	0	8.54	0.647	1	2.37	201	5.32601	0	3	0	2.55	0	1757	1550	0	44.19	0	37.77	8.54	0	0.91	2	0	0	-1.94833	4	4.22726
Ca	-3.768	-1.948	2.09255	-2.00251	2	2.31	26.2	20	1.94	200	1.14	11.8717	42.9372	7.4	1500	225	25.929	1115	17	1.32	0.34	0	0	8.54	0.647	1	2.37	201	5.32601	0	3	0	2.55	0	1757	1550	0	44.19	0	37.77	8.54	0	0.91	2	0	0	-1.94833	4	4.22726
Ca	-3.768	-1.948	2.09255	-2.00251	2	2.31	26.2	20	1.94	200	1.14	11.8717	42.9372	7.4	1500	225	25.929	1115	17	1.32	0.34	0	0	8.54	0.647	1	2.37	201	5.32601	0	3	0	2.55	0	1757	1550	0	44.19	0	37.77	8.54	0	0.91	2	0	0	-1.94833	4	4.22726
Ca	-3.768	-1.948	2.09255	-2.00251	2	2.31	26.2	20	1.94	200	1.14	11.8717	42.9372	7.4	1500	225	25.929	1115	17	1.32	0.34	0	0	8.54	0.647	1	2.37	201	5.32601	0	3	0	2.55	0	1757	1550	0	44.19	0	37.77	8.54	0	0.91	2	0	0	-1.94833	4	4.22726
Sr	-3.528	-1.287	2.091	-1.68597	2	2.49	33.94	78	2.19	35	1.32	11.0303	55.3231	6.1	3000	225	26.79	1050	129.03490683229813	1.42	0.633	0	0	7.43	0.306	1	5.03	212	6.00851	0	3.21	0	2.4	0	1655	2630	0	56.08	0	54.23	7.43	0	0.84	2	0	0	-1.68281	5	4.76895
Sr	-3.528	-1.287	2.091	-1.68597	2	2.49	33.94	78	2.19	35	1.32	11.0303	55.3231	6.1	3000	225	26.79	1050	129.03490683229813	1.42	0.633	0	0	7.43	0.306	1	5.03	212	6.00851	0	3.21	0	2.4	0	1655	2630	0	56.08	0	54.23	7.43	0	0.84	2	0	0	-1.68281	5	4.76895
Sr	-3.528	-1.287	2.091	-1.68597	2	2.49	33.94	78	2.19	35	1.32	11.0303	55.3231	6.1	3000	225	26.79	1050	129.03490683229813	1.42	0.633	0	0	7.43	0.306	1	5.03	212	6.00851	0	3.21	0	2.4	0	1655	2630	0	56.08	0	54.23	7.43	0	0.84	2	0	0	-1.68281	5	4.76895
Sr	-3.528	-1.287	2.091	-1.68597	2	2.49	33.94	78	2.19	35	1.32	11.0303	55.3231	6.1	3000	225	26.79	1050	129.03490683229813	1.42	0.633	0	0	7.43	0.306	1	5.03	212	6.00851	0	3.21	0	2.4	0	1655	2630	0	56.08	0	54.23	7.43	0	0.84	2	0	0	-1.68281	5	4.76895
Sr	-3.528	-1.287	2.091	-1.68597	2	2.49	33.94	78	2.19	35	1.32	11.0303	55.3231	6.1	3000	225	26.79	1050	129.03490683229813	1.42	0.633	0	0	7.43	0.306	1	5.03	212	6.00851	0	3.21	0	2.4	0	1655	2630	0	56.08	0	54.23	7.43	0	0.84	2	0	0	-1.68281	5	4.76895
Sr	-3.528	-1.287	2.091	-1.68597	2	2.49	33.94	78	2.19	35	1.32	11.0303	55.3231	6.1	3000	225	26.79	1050	129.03490683229813	1.42	0.633	0	0	7.43	0.306	1	5.03	212	6.00851	0	3.21	0	2.4	0	1655	2630	0	56.08	0	54.23	7.43	0	0.84	2	0	0	-1.68281	5	4.76895
Sr	-3.528	-1.287	2.091	-1.68597	2	2.49	33.94	78	2.19	35	1.32	11.0303	55.3231	6.1	3000	225	26.79	1050	129.03490683229813	1.42	0.633	0	0	7.43	0.306	1	5.03	212	6.00851	0	3.21	0	2.4	0	1655	2630	0	56.08	0	54.23	7.43	0	0.84	2	0	0	-1.68281	5	4.76895
Sr	-3.528	-1.287	2.091	-1.68597	2	2.49	33.94	78	2.19	35	1.32	11.0303	55.3231	6.1	3000	225	26.79	1050	129.03490683229813	1.42	0.633	0	0	7.43	0.306	1	5.03	212	6.00851	0	3.21	0	2.4	0	1655	2630	0	56.08	0	54.23	7.43	0	0.84	2	0	0	-1.68281	5	4.76895
Sr	-3.528	-1.287	2.091	-1.68597	2	2.49	33.94	78	2.19	35	1.32	11.0303	55.3231	6.1	3000	225	26.79	1050	129.03490683229813	1.42	0.633	0	0	7.43	0.306	1	5.03	212	6.00851	0	3.21	0	2.4	0	1655	2630	0	56.08	0	54.23	7.43	0	0.84	2	0	0	-1.68281	5	4.76895
Sr	-3.528	-1.287	2.091	-1.68597	2	2.49	33.94	78	2.19	35	1.32	11.0303	55.3231	6.1	3000	225	26.79	1050	129.03490683229813	1.42	0.633	0	0	7.43	0.306	1	5.03	212	6.00851	0	3.21	0	2.4	0	1655	2630	0	56.08	0	54.23	7.43	0	0.84	2	0	0	-1.68281	5	4.76895
Sr	-3.528	-1.287	2.091	-1.68597	2	2.49	33.94	78	2.19	35	1.32	11.0303	55.3231	6.1	3000	225	26.79	1050	129.03490683229813	1.42	0.633	0	0	7.43	0.306	1	5.03	212	6.00851	0	3.21	0	2.4	0	1655	2630	0	56.08	0	54.23	7.43	0	0.84	2	0	0	-1.68281	5	4.76895
Sr	-3.528	-1.287	2.091	-1.68597	2	2.49	33.94	78	2.19	35	1.32	11.0303	55.3231	6.1	3000	225	26.79	1050	129.03490683229813	1.42	0.633	0	0	7.43	0.306	1	5.03	212	6.00851	0	3.21	0	2.4	0	1655	2630	0	56.08	0	54.23	7.43	0	0.84	2	0	0	-1.68281	5	4.76895
Sr	-3.528	-1.287	2.091	-1.68597	2	2.49	33.94	78	2.19	35	1.32	11.0303	55.3231	6.1	3000	225	26.79	1050	129.03490683229813	1.42	0.633	0	0	7.43	0.306	1	5.03	212	6.00851	0	3.21	0	2.4	0	1655	2630	0	56.08	0	54.23	7.43	0	0.84	2	0	0	-1.68281	5	4.76895
Sr	-3.528	-1.287	2.091	-1.68597	2	2.49	33.94	78	2.19	35	1.32	11.0303	55.3231	6.1	3000	225	26.79	1050	129.03490683229813	1.42	0.633	0	0	7.43	0.306	1	5.03	212	6.00851	0	3.21	0	2.4	0	1655	2630	0	56.08	0	54.23	7.43	0	0.84	2	0	0	-1.68281	5	4.76895
Sr	-3.528	-1.287	2.091	-1.68597	2	2.49	33.94	78	2.19	35	1.32	11.0303	55.3231	6.1	3000	225	26.79	1050	129.03490683229813	1.42	0.633	0	0	7.43	0.306	1	5.03	212	6.00851	0	3.21	0	2.4	0	1655	2630	0	56.08	0	54.23	7.43	0	0.84	2	0	0	-1.68281	5	4.76895
Sr	-3.528	-1.287	2.091	-1.68597	2	2.49	33.94	78	2.19	35	1.32	11.0303	55.3231	6.1	3000	225	26.79	1050	129.03490683229813	1.42	0.633	0	0	7.43	0.306	1	5.03	212	6.00851	0	3.21	0	2.4	0	1655	2630	0	56.08	0	54.23	7.43	0	0.84	2	0	0	-1.68281	5	4.76895
Sr	-3.528	-1.287	2.091	-1.68597	2	2.49	33.94	78	2.19	35	1.32	11.0303	55.3231	6.1	3000	225	26.79	1050	129.03490683229813	1.42	0.633	0	0	7.43	0.306	1	5.03	212	6.00851	0	3.21	0	2.4	0	1655	2630	0	56.08	0	54.23	7.43	0	0.84	2	0	0	-1.68281	5	4.76895
Ba	-3.235	-2.026	2.36773	-1.92459	2	2.68	38.16	13	2.53	18	1.49	10.0038	64.9693	4.9	2300	229	28.07	1000	9.6	1.515	0.94	0	0	7.12	0.204	1	13.95	223	6.33602	0	3.402	0	2.32	0	2143	3510	0	62.88	0	63.59	7.12	0	0.81	2	0	0	-1.92352	6	5.0289
Ba	-3.235	-2.026	2.36773	-1.92459	2	2.68	38.16	13	2.53	18	1.49	10.0038	64.9693	4.9	2300	229	28.07	1000	9.6	1.515	0.94	0	0	7.12	0.204	1	13.95	223	6.33602	0	3.402	0	2.32	0	2143	3510	0	62.88	0	63.59	7.12	0	0.81	2	0	0	-1.92352	6	5.0289
Ba	-3.235	-2.026	2.36773	-1.92459	2	2.68	38.16	13	2.53	18	1.49	10.0038	64.9693	4.9	2300	229	28.07	1000	9.6	1.515	0.94	0	0	7.12	0.204	1	13.95	223	6.33602	0	3.402	0	2.32	0	2143	3510	0	62.88	0	63.59	7.12	0	0.81	2	0	0	-1.92352	6	5.0289
Ba	-3.235	-2.026	2.36773	-1.92459	2	2.68	38.16	13	2.53	18	1.49	10.0038	64.9693	4.9	2300	229	28.07	1000	9.6	1.515	0.94	0	0	7.12	0.204	1	13.95	223	6.33602	0	3.402	0	2.32	0	2143	3510	0	62.88	0	63.59	7.12	0	0.81	2	0	0	-1.92352	6	5.0289
Ba	-3.235	-2.026	2.36773	-1.92459	2	2.68	38.16	13	2.53	18	1.49	10.0038	64.9693	4.9	2300	229	28.07	1000	9.6	1.515	0.94	0	0	7.12	0.204	1	13.95	223	6.33602	0	3.402	0	2.32	0	2143	3510	0	62.88	0	63.59	7.12	0	0.81	2	0	0	-1.92352	6	5.0289
Ba	-3.235	-2.026	2.36773	-1.92459	2	2.68	38.16	13	2.53	18	1.49	10.0038	64.9693	4.9	2300	229	28.07	1000	9.6	1.515	0.94	0	0	7.12	0.204	1	13.95	223	6.33602	0	3.402	0	2.32	0	2143	3510	0	62.88	0	63.59	7.12	0	0.81	2	0	0	-1.92352	6	5.0289
Ba	-3.235	-2.026	2.36773	-1.92459	2	2.68	38.16	13	2.53	18	1.49	10.0038	64.9693	4.9	2300	229	28.07	1000	9.6	1.515	0.94	0	0	7.12	0.204	1	13.95	223	6.33602	0	3.402	0	2.32	0	2143	3510	0	62.88	0	63.59	7.12	0	0.81	2	0	0	-1.92352	6	5.0289
Ba	-3.235	-2.026	2.36773	-1.92459	2	2.68	38.16	13	2.53	18	1.49	10.0038	64.9693	4.9	2300	229	28.07	1000	9.6	1.515	0.94	0	0	7.12	0.204	1	13.95	223	6.33602	0	3.402	0	2.32	0	2143	3510	0	62.88	0	63.59	7.12	0	0.81	2	0	0	-1.92352	6	5.0289
Ba	-3.235	-2.026	2.36773	-1.92459	2	2.68	38.16	13	2.53	18	1.49	10.0038	64.9693	4.9	2300	229	28.07	1000	9.6	1.515	0.94	0	0	7.12	0.204	1	13.95	223	6.33602	0	3.402	0	2.32	0	2143	3510	0	62.88	0	63.59	7.12	0	0.81	2	0	0	-1.92352	6	5.0289
Ba	-3.235	-2.026	2.36773	-1.92459	2	2.68	38.16	13	2.53	18	1.49	10.0038	64.9693	4.9	2300	229	28.07	1000	9.6	1.515	0.94	0	0	7.12	0.204	1	13.95	223	6.33602	0	3.402	0	2.32	0	2143	3510	0	62.88	0	63.59	7.12	0	0.81	2	0	0	-1.92352	6	5.0289
Ba	-3.235	-2.026	2.36773	-1.92459	2	2.68	38.16	13	2.53	18	1.49	10.0038	64.9693	4.9	2300	229	28.07	1000	9.6	1.515	0.94	0	0	7.12	0.204	1	13.95	223	6.33602	0	3.402	0	2.32	0	2143	3510	0	62.88	0	63.59	7.12	0	0.81	2	0	0	-1.92352	6	5.0289
Ba	-3.235	-2.026	2.36773	-1.92459	2	2.68	38.16	13	2.53	18	1.49	10.0038	64.9693	4.9	2300	229	28.07	1000	9.6	1.515	0.94	0	0	7.12	0.204	1	13.95	223	6.33602	0	3.402	0	2.32	0	2143	3510	0	62.88	0	63.59	7.12	0	0.81	2	0	0	-1.92352	6	5.0289
Ba	-3.235	-2.026	2.36773	-1.92459	2	2.68	38.16	13	2.53	18	1.49	10.0038	64.9693	4.9	2300	229	28.07	1000	9.6	1.515	0.94	0	0	7.12	0.204	1	13.95	223	6.33602	0	3.402	0	2.32	0	2143	3510	0	62.88	0	63.59	7.12	0	0.81	2	0	0	-1.92352	6	5.0289
Ba	-3.235	-2.026	2.36773	-1.92459	2	2.68	38.16	13	2.53	18	1.49	10.0038	64.9693	4.9	2300	229	28.07	1000	9.6	1.515	0.94	0	0	7.12	0.204	1	13.95	223	6.33602	0	3.402	0	2.32	0	2143	3510	0	62.88	0	63.59	7.12	0	0.81	2	0	0	-1.92352	6	5.0289
Ba	-3.235	-2.026	2.36773	-1.92459	2	2.68	38.16	13	2.53	18	1.49	10.0038	64.9693	4.9	2300	229	28.07	1000	9.6	1.515	0.94	0	0	7.12	0.204	1	13.95	223	6.33602	0	3.402	0	2.32	0	2143	3510	0	62.88	0	63.59	7.12	0	0.81	2	0	0	-1.92352	6	5.0289
Ba	-3.235	-2.026	2.36773	-1.92459	2	2.68	38.16	13	2.53	18	1.49	10.0038	64.9693	4.9	2300	229	28.07	1000	9.6	1.515	0.94	0	0	7.12	0.204	1	13.95	223	6.33602	0	3.402	0	2.32	0	2143	3510	0	62.88	0	63.59	7.12	0	0.81	2	0	0	-1.92352	6	5.0289
Ba	-3.235	-2.026	2.36773	-1.92459	2	2.68	38.16	13	2.53	18	1.49	10.0038	64.9693	4.9	2300	229	28.07	1000	9.6	1.515	0.94	0	0	7.12	0.204	1	13.95	223	6.33602	0	3.402	0	2.32	0	2143	3510	0	62.88	0	63.59	7.12	0	0.81	2	0	0	-1.92352	6	5.0289
Sc	-3.29	-3.187	3.36374	-6.3352	3	2.15	15	74	1.84	16	0.885	24.7568	25.0093	29	4500	194	25.52	1814	57	1.22	0.31	0	9	14.1	0.568	0	18.1	162	4.46374	0	2.75	0	3.25	0	3103	2985	0	24.96	1	22.235	14.1	6.35e-06	1.27	2	9	0	-6.28551	4	3.54287
Sc	-3.29	-3.187	3.36374	-6.3352	3	2.15	15	74	1.84	16	0.885	24.7568	25.0093	29	4500	194	25.52	1814	57	1.22	0.31	0	9	14.1	0.568	0	18.1	162	4.46374	0	2.75	0	3.25	0	3103	2985	0	24.96	1	22.235	14.1	6.35e-06	1.27	2	9	0	-6.28551	4	3.54287
Sc	-3.29	-3.187	3.36374	-6.3352	3	2.15	15	74	1.84	16	0.885	24.7568	25.0093	29	4500	194	25.52	1814	57	1.22	0.31	0	9	14.1	0.568	0	18.1	162	4.46374	0	2.75	0	3.25	0	3103	2985	0	24.96	1	22.235	14.1	6.35e-06	1.27	2	9	0	-6.28551	4	3.54287
Sc	-3.29	-3.187	3.36374	-6.3352	3	2.15	15	74	1.84	16	0.885	24.7568	25.0093	29	4500	194	25.52	1814	57	1.22	0.31	0	9	14.1	0.568	0	18.1	162	4.46374	0	2.75	0	3.25	0	3103	2985	0	24.96	1	22.235	14.1	6.35e-06	1.27	2	9	0	-6.28551	4	3.54287
Sc	-3.29	-3.187	3.36374	-6.3352	3	2.15	15	74	1.84	16	0.885	24.7568	25.0093	29	4500	194	25.52	1814	57	1.22	0.31	0	9	14.1	0.568	0	18.1	162	4.46374	0	2.75	0	3.25	0	3103	2985	0	24.96	1	22.235	14.1	6.35e-06	1.27	2	9	0	-6.28551	4	3.54287
Sc	-3.29	-3.187	3.36374	-6.3352	3	2.15	15	74	1.84	16	0.885	24.7568	25.0093	29	4500	194	25.52	1814	57	1.22	0.31	0	9	14.1	0.568	0	18.1	162	4.46374	0	2.75	0	3.25	0	3103	2985	0	24.96	1	22.235	14.1	6.35e-06	1.27	2	9	0	-6.28551	4	3.54287
Sc	-3.29	-3.187	3.36374	-6.3352	3	2.15	15	74	1.84	16	0.885	24.7568	25.0093	29	4500	194	25.52	1814	57	1.22	0.31	0	9	14.1	0.568	0	18.1	162	4.46374	0	2.75	0	3.25	0	3103	2985	0	24.96	1	22.235	14.1	6.35e-06	1.27	2	9	0	-6.28551	4	3.54287
Sc	-3.29	-3.187	3.36374	-6.3352	3	2.15	15	74	1.84	16	0.885	24.7568	25.0093	29	4500	194	25.52	1814	57	1.22	0.31	0	9	14.1	0.568	0	18.1	162	4.46374	0	2.75	0	3.25	0	3103	2985	0	24.96	1	22.235	14.1	6.35e-06	1.27	2	9	0	-6.28551	4	3.54287
Sc	-3.29	-3.187	3.36374	-6.3352	3	2.15	15	74	1.84	16	0.885	24.7568	25.0093	29	4500	194	25.52	1814	57	1.22	0.31	0	9	14.1	0.568	0	18.1	162	4.46374	0	2.75	0	3.25	0	3103	2985	0	24.96	1	22.235	14.1	6.35e-06	1.27	2	9	0	-6.28551	4	3.54287
Sc	-3.29	-3.187	3.36374	-6.3352	3	2.15	15	74	1.84	16	0.885	24.7568	25.0093	29	4500	194	25.52	1814	57	1.22	0.31	0	9	14.1	0.568	0	18.1	162	4.46374	0	2.75	0	3.25	0	3103	2985	0	24.96	1	22.235	14.1	6.35e-06	1.27	2	9	0	-6.28551	4	3.54287
Sc	-3.29	-3.187	3.36374	-6.3352	3	2.15	15	74	1.84	16	0.885	24.7568	25.0093	29	4500	194	25.52	1814	57	1.22	0.31	0	9	14.1	0.568	0	18.1	162	4.46374	0	2.75	0	3.25	0	3103	2985	0	24.96	1	22.235	14.1	6.35e-06	1.27	2	9	0	-6.28551	4	3.54287
Sc	-3.29	-3.187	3.36374	-6.3352	3	2.15	15	74	1.84	16	0.885	24.7568	25.0093	29	4500	194	25.52	1814	57	1.22	0.31	0	9	14.1	0.568	0	18.1	162	4.46374	0	2.75	0	3.25	0	3103	2985	0	24.96	1	22.235	14.1	6.35e-06	1.27	2	9	0	-6.28551	4	3.54287
Sc	-3.29	-3.187	3.36374	-6.3352	3	2.15	15	74	1.84	16	0.885	24.7568	25.0093	29	4500	194	25.52	1814	57	1.22	0.31	0	9	14.1	0.568	0	18.1	162	4.46374	0	2.75	0	3.25	0	3103	2985	0	24.96	1	22.235	14.1	6.35e-06	1.27	2	9	0	-6.28551	4	3.54287
Sc	-3.29	-3.187	3.36374	-6.3352	3	2.15	15	74	1.84	16	0.885	24.7568	25.0093	29	4500	194	25.52	1814	57	1.22	0.31	0	9	14.1	0.568	0	18.1	162	4.46374	0	2.75	0	3.25	0	3103	2985	0	24.96	1	22.235	14.1	6.35e-06	1.27	2	9	0	-6.28551	4	3.54287
Sc	-3.29	-3.187	3.36374	-6.3352	3	2.15	15	74	1.84	16	0.885	24.7568	25.0093	29	4500	194	25.52	1814	57	1.22	0.31	0	9	14.1	0.568	0	18.1	162	4.46374	0	2.75	0	3.25	0	3103	2985	0	24.96	1	22.235	14.1	6.35e-06	1.27	2	9	0	-6.28551	4	3.54287
Sc	-3.29	-3.187	3.36374	-6.3352	3	2.15	15	74	1.84	16	0.885	24.7568	25.0093	29	4500	194	25.52	1814	57	1.22	0.31	0	9	14.1	0.568	0	18.1	162	4.46374	0	2.75	0	3.25	0	3103	2985	0	24.96	1	22.235	14.1	6.35e-06	1.27	2	9	0	-6.28551	4	3.54287
Sc	-3.29	-3.187	3.36374	-6.3352	3	2.15	15	74	1.84	16	0.885	24.7568	25.0093	29	4500	194	25.52	1814	57	1.22	0.31	0	9	14.1	0.568	0	18.1	162	4.46374	0	2.75	0	3.25	0	3103	2985	0	24.96	1	22.235	14.1	6.35e-06	1.27	2	9	0	-6.28551	4	3.54287
Sc	-3.29	-3.187	3.36374	-6.3352	3	2.15	15	74	1.84	16	0.885	24.7568	25.0093	29	4500	194	25.52	1814	57	1.22	0.31	0	9	14.1	0.568	0	18.1	162	4.46374	0	2.75	0	3.25	0	3103	2985	0	24.96	1	22.235	14.1	6.35e-06	1.27	2	9	0	-6.28551	4	3.54287
Y	-2.562	-2.432	3.34353	-6.46738	3	2.32	19.88	64	2.12	17	1.04	20.5244	33.0132	26	2600	194	26.53	1799	41	1.32	0.58	0	9	11.39	0.298	0	29.6	179	5.05877	0	2.94	0	3.2	0	3618	4472	0	32.97	1	32.365	11.39	0	1.21	2	9	0	-6.4646	5	4.01515
Y	-2.562	-2.432	3.34353	-6.46738	3	2.32	19.88	64	2.12	17	1.04	20.5244	33.0132	26	2600	194	26.53	1799	41	1.32	0.58	0	9	11.39	0.298	0	29.6	179	5.05877	0	2.94	0	3.2	0	3618	4472	0	32.97	1	32.365	11.39	0	1.21	2	9	0	-6.4646	5	4.01515
Y	-2.562	-2.432	3.34353	-6.46738	3	2.32	19.88	64	2.12	17	1.04	20.5244	33.0132	26	2600	194	26.53	1799	41	1.32	0.58	0	9	11.39	0.298	0	29.6	179	5.05877	0	2.94	0	3.2	0	3618	4472	0	32.97	1	32.365	11.39	0	1.21	2	9	0	-6.4646	5	4.01515
Y	-2.562	-2.432	3.34353	-6.46738	3	2.32	19.88	64	2.12	17	1.04	20.5244	33.0132	26	2600	194	26.53	1799	41	1.32	0.58	0	9	11.39	0.298	0	29.6	179	5.05877	0	2.94	0	3.2	0	3618	4472	0	32.97	1	32.365	11.39	0	1.21	2	9	0	-6.4646	5	4.01515
Y	-2.562	-2.432	3.34353	-6.46738	3	2.32	19.88	64	2.12	17	1.04	20.5244	33.0132	26	2600	194	26.53	1799	41	1.32	0.58	0	9	11.39	0.298	0	29.6	179	5.05877	0	2.94	0	3.2	0	3618	4472	0	32.97	1	32.365	11.39	0	1.21	2	9	0	-6.4646	5	4.01515
Y	-2.562	-2.432	3.34353	-6.46738	3	2.32	19.88	64	2.12	17	1.04	20.5244	33.0132	26	2600	194	26.53	1799	41	1.32	0.58	0	9	11.39	0.298	0	29.6	179	5.05877	0	2.94	0	3.2	0	3618	4472	0	32.97	1	32.365	11.39	0	1.21	2	9	0	-6.4646	5	4.01515
Y	-2.562	-2.432	3.34353	-6.46738	3	2.32	19.88	64	2.12	17	1.04	20.5244	33.0132	26	2600	194	26.53	1799	41	1.32	0.58	0	9	11.39	0.298	0	29.6	179	5.05877	0	2.94	0	3.2	0	3618	4472	0	32.97	1	32.365	11.39	0	1.21	2	9	0	-6.4646	5	4.01515
Y	-2.562	-2.432	3.34353	-6.46738	3	2.32	19.88	64	2.12	17	1.04	20.5244	33.0132	26	2600	194	26.53	1799	41	1.32	0.58	0	9	11.39	0.298	0	29.6	179	5.05877	0	2.94	0	3.2	0	3618	4472	0	32.97	1	32.365	11.39	0	1.21	2	9	0	-6.4646	5	4.01515
Y	-2.562	-2.432	3.34353	-6.46738	3	2.32	19.88	64	2.12	17	1.04	20.5244	33.0132	26	2600	194	26.53	1799	41	1.32	0.58	0	9	11.39	0.298	0	29.6	179	5.05877	0	2.94	0	3.2	0	3618	4472	0	32.97	1	32.365	11.39	0	1.21	2	9	0	-6.4646	5	4.01515
Y	-2.562	-2.432	3.34353	-6.46738	3	2.32	19.88	64	2.12	17	1.04	20.5244	33.0132	26	2600	194	26.53	1799	41	1.32	0.58	0	9	11.39	0.298	0	29.6	179	5.05877	0	2.94	0	3.2	0	3618	4472	0	32.97	1	32.365	11.39	0	1.21	2	9	0	-6.4646	5	4.01515
Y	-2.562	-2.432	3.34353	-6.46738	3	2.32	19.88	64	2.12	17	1.04	20.5244	33.0132	26	2600	194	26.53	1799	41	1.32	0.58	0	9	11.39	0.298	0	29.6	179	5.05877	0	2.94	0	3.2	0	3618	4472	0	32.97	1	32.365	11.39	0	1.21	2	9	0	-6.4646	5	4.01515
Y	-2.562	-2.432	3.34353	-6.46738	3	2.32	19.88	64	2.12	17	1.04	20.5244	33.0132	26	2600	194	26.53	1799	41	1.32	0.58	0	9	11.39	0.298	0	29.6	179	5.05877	0	2.94	0	3.2	0	3618	4472	0	32.97	1	32.365	11.39	0	1.21	2	9	0	-6.4646	5	4.01515
Y	-2.562	-2.432	3.34353	-6.46738	3	2.32	19.88	64	2.12	17	1.04	20.5244	33.0132	26	2600	194	26.53	1799	41	1.32	0.58	0	9	11.39	0.298	0	29.6	179	5.05877	0	2.94	0	3.2	0	3618	4472	0	32.97	1	32.365	11.39	0	1.21	2	9	0	-6.4646	5	4.01515
Y	-2.562	-2.432	3.34353	-6.46738	3	2.32	19.88	64	2.12	17	1.04	20.5244	33.0132	26	2600	194	26.53	1799	41	1.32	0.58	0	9	11.39	0.298	0	29.6	179	5.05877	0	2.94	0	3.2	0	3618	4472	0	32.97	1	32.365	11.39	0	1.21	2	9	0	-6.4646	5	4.01515
Y	-2.562	-2.432	3.34353	-6.46738	3	2.32	19.88	64	2.12	17	1.04	20.5244	33.0132	26	2600	194	26.53	1799	41	1.32	0.58	0	9	11.39	0.298	0	29.6	179	5.05877	0	2.94	0	3.2	0	3618	4472	0	32.97	1	32.365	11.39	0	1.21	2	9	0	-6.4646	5	4.01515
Y	-2.562	-2.432	3.34353	-6.46738	3	2.32	19.88	64	2.12	17	1.04	20.5244	33.0132	26	2600	194	26.53	1799	41	1.32	0.58	0	9	11.39	0.298	0	29.6	179	5.05877	0	2.94	0	3.2	0	3618	4472	0	32.97	1	32.365	11.39	0	1.21	2	9	0	-6.4646	5	4.01515
Y	-2.562	-2.432	3.34353	-6.46738	3	2.32	19.88	64	2.12	17	1.04	20.5244	33.0132	26	2600	194	26.53	1799	41	1.32	0.58	0	9	11.39	0.298	0	29.6	179	5.05877	0	2.94	0	3.2	0	3618	4472	0	32.97	1	32.365	11.39	0	1.21	2	9	0	-6.4646	5	4.01515
Y	-2.562	-2.432	3.34353	-6.46738	3	2.32	19.88	64	2.12	17	1.04	20.5244	33.0132	26	2600	194	26.53	1799	41	1.32	0.58	0	9	11.39	0.298	0	29.6	179	5.05877	0	2.94	0	3.2	0	3618	4472	0	32.97	1	32.365	11.39	0	1.21	2	9	0	-6.4646	5	4.01515
La	-2.885	-2.881	3.04762	-4.94789	3	2.43	22.39	37	1.61	13	1.172	19.1773	37.5306	14	3100	194	27.11	1193	28	1.375	0.874	0	9	6.2	0.195	0	48	187	5.28468	0	3.08	0	3.17	0	3737	6146	1	37.42	0	36.8975	6.2	0	1.18	2	9	0	-4.92755	6	4.19446
La	-2.885	-2.881	3.04762	-4.94789	3	2.43	22.39	37	1.61	13	1.172	19.1773	37.5306	14	3100	194	27.11	1193	28	1.375	0.874	0	9	6.2	0.195	0	48	187	5.28468	0	3.08	0	3.17	0	3737	6146	1	37.42	0	36.8975	6.2	0	1.18	2	9	0	-4.92755	6	4.19446
La	-2.885	-2.881	3.04762	-4.94789	3	2.43	22.39	37	1.61	13	1.172	19.1773	37.5306	14	3100	194	27.11	1193	28	1.375	0.874	0	9	6.2	0.195	0	48	187	5.28468	0	3.08	0	3.17	0	3737	6146	1	37.42	0	36.8975	6.2	0	1.18	2	9	0	-4.92755	6	4.19446
La	-2.885	-2.881	3.04762	-4.94789	3	2.43	22.39	37	1.61	13	1.172	19.1773	37.5306	14	3100	194	27.11	1193	28	1.375	0.874	0	9	6.2	0.195	0	48	187	5.28468	0	3.08	0	3.17	0	3737	6146	1	37.42	0	36.8975	6.2	0	1.18	2	9	0	-4.92755	6	4.19446
La	-2.885	-2.881	3.04762	-4.94789	3	2.43	22.39	37	1.61	13	1.172	19.1773	37.5306	14	3100	194	27.11	1193	28	1.375	0.874	0	9	6.2	0.195	0	48	187	5.28468	0	3.08	0	3.17	0	3737	6146	1	37.42	0	36.8975	6.2	0	1.18	2	9	0	-4.92755	6	4.19446
La	-2.885	-2.881	3.04762	-4.94789	3	2.43	22.39	37	1.61	13	1.172	19.1773	37.5306	14	3100	194	27.11	1193	28	1.375	0.874	0	9	6.2	0.195	0	48	187	5.28468	0	3.08	0	3.17	0	3737	6146	1	37.42	0	36.8975	6.2	0	1.18	2	9	0	-4.92755	6	4.19446
La	-2.885	-2.881	3.04762	-4.94789	3	2.43	22.39	37	1.61	13	1.172	19.1773	37.5306	14	3100	194	27.11	1193	28	1.375	0.874	0	9	6.2	0.195	0	48	187	5.28468	0	3.08	0	3.17	0	3737	6146	1	37.42	0	36.8975	6.2	0	1.18	2	9	0	-4.92755	6	4.19446
La	-2.885	-2.881	3.04762	-4.94789	3	2.43	22.39	37	1.61	13	1.172	19.1773	37.5306	14	3100	194	27.11	1193	28	1.375	0.874	0	9	6.2	0.195	0	48	187	5.28468	0	3.08	0	3.17	0	3737	6146	1	37.42	0	36.8975	6.2	0	1.18	2	9	0	-4.92755	6	4.19446
La	-2.885	-2.881	3.04762	-4.94789	3	2.43	22.39	37	1.61	13	1.172	19.1773	37.5306	14	3100	194	27.11	1193	28	1.375	0.874	0	9	6.2	0.195	0	48	187	5.28468	0	3.08	0	3.17	0	3737	6146	1	37.42	0	36.8975	6.2	0	1.18	2	9	0	-4.92755	6	4.19446
La	-2.885	-2.881	3.04762	-4.94789	3	2.43	22.39	37	1.61	13	1.172	19.1773	37.5306	14	3100	194	27.11	1193	28	1.375	0.874	0	9	6.2	0.195	0	48	187	5.28468	0	3.08	0	3.17	0	3737	6146	1	37.42	0	36.8975	6.2	0	1.18	2	9	0	-4.92755	6	4.19446
La	-2.885	-2.881	3.04762	-4.94789	3	2.43	22.39	37	1.61	13	1.172	19.1773	37.5306	14	3100	194	27.11	1193	28	1.375	0.874	0	9	6.2	0.195	0	48	187	5.28468	0	3.08	0	3.17	0	3737	6146	1	37.42	0	36.8975	6.2	0	1.18	2	9	0	-4.92755	6	4.19446
La	-2.885	-2.881	3.04762	-4.94789	3	2.43	22.39	37	1.61	13	1.172	19.1773	37.5306	14	3100	194	27.11	1193	28	1.375	0.874	0	9	6.2	0.195	0	48	187	5.28468	0	3.08	0	3.17	0	3737	6146	1	37.42	0	36.8975	6.2	0	1.18	2	9	0	-4.92755	6	4.19446
La	-2.885	-2.881	3.04762	-4.94789	3	2.43	22.39	37	1.61	13	1.172	19.1773	37.5306	14	3100	194	27.11	1193	28	1.375	0.874	0	9	6.2	0.195	0	48	187	5.28468	0	3.08	0	3.17	0	3737	6146	1	37.42	0	36.8975	6.2	0	1.18	2	9	0	-4.92755	6	4.19446
La	-2.885	-2.881	3.04762	-4.94789	3	2.43	22.39	37	1.61	13	1.172	19.1773	37.5306	14	3100	194	27.11	1193	28	1.375	0.874	0	9	6.2	0.195	0	48	187	5.28468	0	3.08	0	3.17	0	3737	6146	1	37.42	0	36.8975	6.2	0	1.18	2	9	0	-4.92755	6	4.19446
La	-2.885	-2.881	3.04762	-4.94789	3	2.43	22.39	37	1.61	13	1.172	19.1773	37.5306	14	3100	194	27.11	1193	28	1.375	0.874	0	9	6.2	0.195	0	48	187	5.28468	0	3.08	0	3.17	0	3737	6146	1	37.42	0	36.8975	6.2	0	1.18	2	9	0	-4.92755	6	4.19446
La	-2.885	-2.881	3.04762	-4.94789	3	2.43	22.39	37	1.61	13	1.172	19.1773	37.5306	14	3100	194	27.11	1193	28	1.375	0.874	0	9	6.2	0.195	0	48	187	5.28468	0	3.08	0	3.17	0	3737	6146	1	37.42	0	36.8975	6.2	0	1.18	2	9	0	-4.92755	6	4.19446
La	-2.885	-2.881	3.04762	-4.94789	3	2.43	22.39	37	1.61	13	1.172	19.1773	37.5306	14	3100	194	27.11	1193	28	1.375	0.874	0	9	6.2	0.195	0	48	187	5.28468	0	3.08	0	3.17	0	3737	6146	1	37.42	0	36.8975	6.2	0	1.18	2	9	0	-4.92755	6	4.19446
La	-2.885	-2.881	3.04762	-4.94789	3	2.43	22.39	37	1.61	13	1.172	19.1773	37.5306	14	3100	194	27.11	1193	28	1.375	0.874	0	9	6.2	0.195	0	48	187	5.28468	0	3.08	0	3.17	0	3737	6146	1	37.42	0	36.8975	6.2	0	1.18	2	9	0	-4.92755	6	4.19446
Ti	-4.368	-4.227	3.44924	-7.89713	4	2.11	10.64	116	1.76	22	0.745	43.2672	17.6363	44	1600	194	25.06	1941	110	1.15	0.28	0	8	14.15	0.524	0	7.6	142	4.05669	0	2.58	0	3.8	0	3560	4507	0	17.67	1	16.69	14.15	2.25333333333e-05	1.52	2	8	0	-7.77523	4	3.2198
Ti	-4.368	-4.227	3.44924	-7.89713	4	2.11	10.64	116	1.76	22	0.745	43.2672	17.6363	44	1600	194	25.06	1941	110	1.15	0.28	0	8	14.15	0.524	0	7.6	142	4.05669	0	2.58	0	3.8	0	3560	4507	0	17.67	1	16.69	14.15	2.25333333333e-05	1.52	2	8	0	-7.77523	4	3.2198
Ti	-4.368	-4.227	3.44924	-7.89713	4	2.11	10.64	116	1.76	22	0.745	43.2672	17.6363	44	1600	194	25.06	1941	110	1.15	0.28	0	8	14.15	0.524	0	7.6	142	4.05669	0	2.58	0	3.8	0	3560	4507	0	17.67	1	16.69	14.15	2.25333333333e-05	1.52	2	8	0	-7.77523	4	3.2198
Ti	-4.368	-4.227	3.44924	-7.89713	4	2.11	10.64	116	1.76	22	0.745	43.2672	17.6363	44	1600	194	25.06	1941	110	1.15	0.28	0	8	14.15	0.524	0	7.6	142	4.05669	0	2.58	0	3.8	0	3560	4507	0	17.67	1	16.69	14.15	2.25333333333e-05	1.52	2	8	0	-7.77523	4	3.2198
Ti	-4.368	-4.227	3.44924	-7.89713	4	2.11	10.64	116	1.76	22	0.745	43.2672	17.6363	44	1600	194	25.06	1941	110	1.15	0.28	0	8	14.15	0.524	0	7.6	142	4.05669	0	2.58	0	3.8	0	3560	4507	0	17.67	1	16.69	14.15	2.25333333333e-05	1.52	2	8	0	-7.77523	4	3.2198
Ti	-4.368	-4.227	3.44924	-7.89713	4	2.11	10.64	116	1.76	22	0.745	43.2672	17.6363	44	1600	194	25.06	1941	110	1.15	0.28	0	8	14.15	0.524	0	7.6	142	4.05669	0	2.58	0	3.8	0	3560	4507	0	17.67	1	16.69	14.15	2.25333333333e-05	1.52	2	8	0	-7.77523	4	3.2198
Ti	-4.368	-4.227	3.44924	-7.89713	4	2.11	10.64	116	1.76	22	0.745	43.2672	17.6363	44	1600	194	25.06	1941	110	1.15	0.28	0	8	14.15	0.524	0	7.6	142	4.05669	0	2.58	0	3.8	0	3560	4507	0	17.67	1	16.69	14.15	2.25333333333e-05	1.52	2	8	0	-7.77523	4	3.2198
Ti	-4.368	-4.227	3.44924	-7.89713	4	2.11	10.64	116	1.76	22	0.745	43.2672	17.6363	44	1600	194	25.06	1941	110	1.15	0.28	0	8	14.15	0.524	0	7.6	142	4.05669	0	2.58	0	3.8	0	3560	4507	0	17.67	1	16.69	14.15	2.25333333333e-05	1.52	2	8	0	-7.77523	4	3.2198
Ti	-4.368	-4.227	3.44924	-7.89713	4	2.11	10.64	116	1.76	22	0.745	43.2672	17.6363	44	1600	194	25.06	1941	110	1.15	0.28	0	8	14.15	0.524	0	7.6	142	4.05669	0	2.58	0	3.8	0	3560	4507	0	17.67	1	16.69	14.15	2.25333333333e-05	1.52	2	8	0	-7.77523	4	3.2198
Ti	-4.368	-4.227	3.44924	-7.89713	4	2.11	10.64	116	1.76	22	0.745	43.2672	17.6363	44	1600	194	25.06	1941	110	1.15	0.28	0	8	14.15	0.524	0	7.6	142	4.05669	0	2.58	0	3.8	0	3560	4507	0	17.67	1	16.69	14.15	2.25333333333e-05	1.52	2	8	0	-7.77523	4	3.2198
Ti	-4.368	-4.227	3.44924	-7.89713	4	2.11	10.64	116	1.76	22	0.745	43.2672	17.6363	44	1600	194	25.06	1941	110	1.15	0.28	0	8	14.15	0.524	0	7.6	142	4.05669	0	2.58	0	3.8	0	3560	4507	0	17.67	1	16.69	14.15	2.25333333333e-05	1.52	2	8	0	-7.77523	4	3.2198
Ti	-4.368	-4.227	3.44924	-7.89713	4	2.11	10.64	116	1.76	22	0.745	43.2672	17.6363	44	1600	194	25.06	1941	110	1.15	0.28	0	8	14.15	0.524	0	7.6	142	4.05669	0	2.58	0	3.8	0	3560	4507	0	17.67	1	16.69	14.15	2.25333333333e-05	1.52	2	8	0	-7.77523	4	3.2198
Ti	-4.368	-4.227	3.44924	-7.89713	4	2.11	10.64	116	1.76	22	0.745	43.2672	17.6363	44	1600	194	25.06	1941	110	1.15	0.28	0	8	14.15	0.524	0	7.6	142	4.05669	0	2.58	0	3.8	0	3560	4507	0	17.67	1	16.69	14.15	2.25333333333e-05	1.52	2	8	0	-7.77523	4	3.2198
Ti	-4.368	-4.227	3.44924	-7.89713	4	2.11	10.64	116	1.76	22	0.745	43.2672	17.6363	44	1600	194	25.06	1941	110	1.15	0.28	0	8	14.15	0.524	0	7.6	142	4.05669	0	2.58	0	3.8	0	3560	4507	0	17.67	1	16.69	14.15	2.25333333333e-05	1.52	2	8	0	-7.77523	4	3.2198
Ti	-4.368	-4.227	3.44924	-7.89713	4	2.11	10.64	116	1.76	22	0.745	43.2672	17.6363	44	1600	194	25.06	1941	110	1.15	0.28	0	8	14.15	0.524	0	7.6	142	4.05669	0	2.58	0	3.8	0	3560	4507	0	17.67	1	16.69	14.15	2.25333333333e-05	1.52	2	8	0	-7.77523	4	3.2198
Ti	-4.368	-4.227	3.44924	-7.89713	4	2.11	10.64	116	1.76	22	0.745	43.2672	17.6363	44	1600	194	25.06	1941	110	1.15	0.28	0	8	14.15	0.524	0	7.6	142	4.05669	0	2.58	0	3.8	0	3560	4507	0	17.67	1	16.69	14.15	2.25333333333e-05	1.52	2	8	0	-7.77523	4	3.2198
Ti	-4.368	-4.227	3.44924	-7.89713	4	2.11	10.64	116	1.76	22	0.745	43.2672	17.6363	44	1600	194	25.06	1941	110	1.15	0.28	0	8	14.15	0.524	0	7.6	142	4.05669	0	2.58	0	3.8	0	3560	4507	0	17.67	1	16.69	14.15	2.25333333333e-05	1.52	2	8	0	-7.77523	4	3.2198
Zr	-3.668	-3.508	3.63321	-8.54752	4	2.23	14.02	68	2.06	23	0.86	34.4184	23.2659	33	2600	194	25.36	2128	129.03490683229813	1.265	0.54	0	8	21	0.278	0	41.1	158	4.52708	0	2.825	0	3.45	0	4682	6511	0	23.29	1	23.195	21	0	1.41	2	8	0	-8.54596	5	3.59315
Zr	-3.668	-3.508	3.63321	-8.54752	4	2.23	14.02	68	2.06	23	0.86	34.4184	23.2659	33	2600	194	25.36	2128	129.03490683229813	1.265	0.54	0	8	21	0.278	0	41.1	158	4.52708	0	2.825	0	3.45	0	4682	6511	0	23.29	1	23.195	21	0	1.41	2	8	0	-8.54596	5	3.59315
Zr	-3.668	-3.508	3.63321	-8.54752	4	2.23	14.02	68	2.06	23	0.86	34.4184	23.2659	33	2600	194	25.36	2128	129.03490683229813	1.265	0.54	0	8	21	0.278	0	41.1	158	4.52708	0	2.825	0	3.45	0	4682	6511	0	23.29	1	23.195	21	0	1.41	2	8	0	-8.54596	5	3.59315
Zr	-3.668	-3.508	3.63321	-8.54752	4	2.23	14.02	68	2.06	23	0.86	34.4184	23.2659	33	2600	194	25.36	2128	129.03490683229813	1.265	0.54	0	8	21	0.278	0	41.1	158	4.52708	0	2.825	0	3.45	0	4682	6511	0	23.29	1	23.195	21	0	1.41	2	8	0	-8.54596	5	3.59315
Zr	-3.668	-3.508	3.63321	-8.54752	4	2.23	14.02	68	2.06	23	0.86	34.4184	23.2659	33	2600	194	25.36	2128	129.03490683229813	1.265	0.54	0	8	21	0.278	0	41.1	158	4.52708	0	2.825	0	3.45	0	4682	6511	0	23.29	1	23.195	21	0	1.41	2	8	0	-8.54596	5	3.59315
Zr	-3.668	-3.508	3.63321	-8.54752	4	2.23	14.02	68	2.06	23	0.86	34.4184	23.2659	33	2600	194	25.36	2128	129.03490683229813	1.265	0.54	0	8	21	0.278	0	41.1	158	4.52708	0	2.825	0	3.45	0	4682	6511	0	23.29	1	23.195	21	0	1.41	2	8	0	-8.54596	5	3.59315
Zr	-3.668	-3.508	3.63321	-8.54752	4	2.23	14.02	68	2.06	23	0.86	34.4184	23.2659	33	2600	194	25.36	2128	129.03490683229813	1.265	0.54	0	8	21	0.278	0	41.1	158	4.52708	0	2.825	0	3.45	0	4682	6511	0	23.29	1	23.195	21	0	1.41	2	8	0	-8.54596	5	3.59315
Zr	-3.668	-3.508	3.63321	-8.54752	4	2.23	14.02	68	2.06	23	0.86	34.4184	23.2659	33	2600	194	25.36	2128	129.03490683229813	1.265	0.54	0	8	21	0.278	0	41.1	158	4.52708	0	2.825	0	3.45	0	4682	6511	0	23.29	1	23.195	21	0	1.41	2	8	0	-8.54596	5	3.59315
Zr	-3.668	-3.508	3.63321	-8.54752	4	2.23	14.02	68	2.06	23	0.86	34.4184	23.2659	33	2600	194	25.36	2128	129.03490683229813	1.265	0.54	0	8	21	0.278	0	41.1	158	4.52708	0	2.825	0	3.45	0	4682	6511	0	23.29	1	23.195	21	0	1.41	2	8	0	-8.54596	5	3.59315
Zr	-3.668	-3.508	3.63321	-8.54752	4	2.23	14.02	68	2.06	23	0.86	34.4184	23.2659	33	2600	194	25.36	2128	129.03490683229813	1.265	0.54	0	8	21	0.278	0	41.1	158	4.52708	0	2.825	0	3.45	0	4682	6511	0	23.29	1	23.195	21	0	1.41	2	8	0	-8.54596	5	3.59315
Zr	-3.668	-3.508	3.63321	-8.54752	4	2.23	14.02	68	2.06	23	0.86	34.4184	23.2659	33	2600	194	25.36	2128	129.03490683229813	1.265	0.54	0	8	21	0.278	0	41.1	158	4.52708	0	2.825	0	3.45	0	4682	6511	0	23.29	1	23.195	21	0	1.41	2	8	0	-8.54596	5	3.59315
Zr	-3.668	-3.508	3.63321	-8.54752	4	2.23	14.02	68	2.06	23	0.86	34.4184	23.2659	33	2600	194	25.36	2128	129.03490683229813	1.265	0.54	0	8	21	0.278	0	41.1	158	4.52708	0	2.825	0	3.45	0	4682	6511	0	23.29	1	23.195	21	0	1.41	2	8	0	-8.54596	5	3.59315
Zr	-3.668	-3.508	3.63321	-8.54752	4	2.23	14.02	68	2.06	23	0.86	34.4184	23.2659	33	2600	194	25.36	2128	129.03490683229813	1.265	0.54	0	8	21	0.278	0	41.1	158	4.52708	0	2.825	0	3.45	0	4682	6511	0	23.29	1	23.195	21	0	1.41	2	8	0	-8.54596	5	3.59315
Zr	-3.668	-3.508	3.63321	-8.54752	4	2.23	14.02	68	2.06	23	0.86	34.4184	23.2659	33	2600	194	25.36	2128	129.03490683229813	1.265	0.54	0	8	21	0.278	0	41.1	158	4.52708	0	2.825	0	3.45	0	4682	6511	0	23.29	1	23.195	21	0	1.41	2	8	0	-8.54596	5	3.59315
Zr	-3.668	-3.508	3.63321	-8.54752	4	2.23	14.02	68	2.06	23	0.86	34.4184	23.2659	33	2600	194	25.36	2128	129.03490683229813	1.265	0.54	0	8	21	0.278	0	41.1	158	4.52708	0	2.825	0	3.45	0	4682	6511	0	23.29	1	23.195	21	0	1.41	2	8	0	-8.54596	5	3.59315
Zr	-3.668	-3.508	3.63321	-8.54752	4	2.23	14.02	68	2.06	23	0.86	34.4184	23.2659	33	2600	194	25.36	2128	129.03490683229813	1.265	0.54	0	8	21	0.278	0	41.1	158	4.52708	0	2.825	0	3.45	0	4682	6511	0	23.29	1	23.195	21	0	1.41	2	8	0	-8.54596	5	3.59315
Zr	-3.668	-3.508	3.63321	-8.54752	4	2.23	14.02	68	2.06	23	0.86	34.4184	23.2659	33	2600	194	25.36	2128	129.03490683229813	1.265	0.54	0	8	21	0.278	0	41.1	158	4.52708	0	2.825	0	3.45	0	4682	6511	0	23.29	1	23.195	21	0	1.41	2	8	0	-8.54596	5	3.59315
Hf	-2.778	-2.774	3.58812	-9.95427	4	2.23	13.44	78	2.08	23	0.85	33.37	22.2687	30	2600	194	25.73	2506	110	1.3	0.63	0	8	27.2	0.144	0	0	158	4.4614	0	2.91	0	3.6	0	4876	13310	0	22.42	1	22.2	27.2	0	1.45	2	8	14	-9.9543	6	3.54101
Hf	-2.778	-2.774	3.58812	-9.95427	4	2.23	13.44	78	2.08	23	0.85	33.37	22.2687	30	2600	194	25.73	2506	110	1.3	0.63	0	8	27.2	0.144	0	0	158	4.4614	0	2.91	0	3.6	0	4876	13310	0	22.42	1	22.2	27.2	0	1.45	2	8	14	-9.9543	6	3.54101
Hf	-2.778	-2.774	3.58812	-9.95427	4	2.23	13.44	78	2.08	23	0.85	33.37	22.2687	30	2600	194	25.73	2506	110	1.3	0.63	0	8	27.2	0.144	0	0	158	4.4614	0	2.91	0	3.6	0	4876	13310	0	22.42	1	22.2	27.2	0	1.45	2	8	14	-9.9543	6	3.54101
Hf	-2.778	-2.774	3.58812	-9.95427	4	2.23	13.44	78	2.08	23	0.85	33.37	22.2687	30	2600	194	25.73	2506	110	1.3	0.63	0	8	27.2	0.144	0	0	158	4.4614	0	2.91	0	3.6	0	4876	13310	0	22.42	1	22.2	27.2	0	1.45	2	8	14	-9.9543	6	3.54101
Hf	-2.778	-2.774	3.58812	-9.95427	4	2.23	13.44	78	2.08	23	0.85	33.37	22.2687	30	2600	194	25.73	2506	110	1.3	0.63	0	8	27.2	0.144	0	0	158	4.4614	0	2.91	0	3.6	0	4876	13310	0	22.42	1	22.2	27.2	0	1.45	2	8	14	-9.9543	6	3.54101
Hf	-2.778	-2.774	3.58812	-9.95427	4	2.23	13.44	78	2.08	23	0.85	33.37	22.2687	30	2600	194	25.73	2506	110	1.3	0.63	0	8	27.2	0.144	0	0	158	4.4614	0	2.91	0	3.6	0	4876	13310	0	22.42	1	22.2	27.2	0	1.45	2	8	14	-9.9543	6	3.54101
Hf	-2.778	-2.774	3.58812	-9.95427	4	2.23	13.44	78	2.08	23	0.85	33.37	22.2687	30	2600	194	25.73	2506	110	1.3	0.63	0	8	27.2	0.144	0	0	158	4.4614	0	2.91	0	3.6	0	4876	13310	0	22.42	1	22.2	27.2	0	1.45	2	8	14	-9.9543	6	3.54101
Hf	-2.778	-2.774	3.58812	-9.95427	4	2.23	13.44	78	2.08	23	0.85	33.37	22.2687	30	2600	194	25.73	2506	110	1.3	0.63	0	8	27.2	0.144	0	0	158	4.4614	0	2.91	0	3.6	0	4876	13310	0	22.42	1	22.2	27.2	0	1.45	2	8	14	-9.9543	6	3.54101
Hf	-2.778	-2.774	3.58812	-9.95427	4	2.23	13.44	78	2.08	23	0.85	33.37	22.2687	30	2600	194	25.73	2506	110	1.3	0.63	0	8	27.2	0.144	0	0	158	4.4614	0	2.91	0	3.6	0	4876	13310	0	22.42	1	22.2	27.2	0	1.45	2	8	14	-9.9543	6	3.54101
Hf	-2.778	-2.774	3.58812	-9.95427	4	2.23	13.44	78	2.08	23	0.85	33.37	22.2687	30	2600	194	25.73	2506	110	1.3	0.63	0	8	27.2	0.144	0	0	158	4.4614	0	2.91	0	3.6	0	4876	13310	0	22.42	1	22.2	27.2	0	1.45	2	8	14	-9.9543	6	3.54101
Hf	-2.778	-2.774	3.58812	-9.95427	4	2.23	13.44	78	2.08	23	0.85	33.37	22.2687	30	2600	194	25.73	2506	110	1.3	0.63	0	8	27.2	0.144	0	0	158	4.4614	0	2.91	0	3.6	0	4876	13310	0	22.42	1	22.2	27.2	0	1.45	2	8	14	-9.9543	6	3.54101
Hf	-2.778	-2.774	3.58812	-9.95427	4	2.23	13.44	78	2.08	23	0.85	33.37	22.2687	30	2600	194	25.73	2506	110	1.3	0.63	0	8	27.2	0.144	0	0	158	4.4614	0	2.91	0	3.6	0	4876	13310	0	22.42	1	22.2	27.2	0	1.45	2	8	14	-9.9543	6	3.54101
Hf	-2.778	-2.774	3.58812	-9.95427	4	2.23	13.44	78	2.08	23	0.85	33.37	22.2687	30	2600	194	25.73	2506	110	1.3	0.63	0	8	27.2	0.144	0	0	158	4.4614	0	2.91	0	3.6	0	4876	13310	0	22.42	1	22.2	27.2	0	1.45	2	8	14	-9.9543	6	3.54101
Hf	-2.778	-2.774	3.58812	-9.95427	4	2.23	13.44	78	2.08	23	0.85	33.37	22.2687	30	2600	194	25.73	2506	110	1.3	0.63	0	8	27.2	0.144	0	0	158	4.4614	0	2.91	0	3.6	0	4876	13310	0	22.42	1	22.2	27.2	0	1.45	2	8	14	-9.9543	6	3.54101
Hf	-2.778	-2.774	3.58812	-9.95427	4	2.23	13.44	78	2.08	23	0.85	33.37	22.2687	30	2600	194	25.73	2506	110	1.3	0.63	0	8	27.2	0.144	0	0	158	4.4614	0	2.91	0	3.6	0	4876	13310	0	22.42	1	22.2	27.2	0	1.45	2	8	14	-9.9543	6	3.54101
Hf	-2.778	-2.774	3.58812	-9.95427	4	2.23	13.44	78	2.08	23	0.85	33.37	22.2687	30	2600	194	25.73	2506	110	1.3	0.63	0	8	27.2	0.144	0	0	158	4.4614	0	2.91	0	3.6	0	4876	13310	0	22.42	1	22.2	27.2	0	1.45	2	8	14	-9.9543	6	3.54101
Hf	-2.778	-2.774	3.58812	-9.95427	4	2.23	13.44	78	2.08	23	0.85	33.37	22.2687	30	2600	194	25.73	2506	110	1.3	0.63	0	8	27.2	0.144	0	0	158	4.4614	0	2.91	0	3.6	0	4876	13310	0	22.42	1	22.2	27.2	0	1.45	2	8	14	-9.9543	6	3.54101
V	-4.469	-4.362	3.63269	-9.08663	5	2.07	8.32	128	1.71	31	0.68	65.2816	13.8449	47	3400	229	24.89	2183	160	1.09	0.26	0	7	21.5	0.489	0	50.6	134	3.73347	0	2.43	0	4.25	0	3680	6110	0	13.88	1	13.01	21.5	0	1.64	2	7	0	-8.93926	4	2.96326
V	-4.469	-4.362	3.63269	-9.08663	5	2.07	8.32	128	1.71	31	0.68	65.2816	13.8449	47	3400	229	24.89	2183	160	1.09	0.26	0	7	21.5	0.489	0	50.6	134	3.73347	0	2.43	0	4.25	0	3680	6110	0	13.88	1	13.01	21.5	0	1.64	2	7	0	-8.93926	4	2.96326
V	-4.469	-4.362	3.63269	-9.08663	5	2.07	8.32	128	1.71	31	0.68	65.2816	13.8449	47	3400	229	24.89	2183	160	1.09	0.26	0	7	21.5	0.489	0	50.6	134	3.73347	0	2.43	0	4.25	0	3680	6110	0	13.88	1	13.01	21.5	0	1.64	2	7	0	-8.93926	4	2.96326
V	-4.469	-4.362	3.63269	-9.08663	5	2.07	8.32	128	1.71	31	0.68	65.2816	13.8449	47	3400	229	24.89	2183	160	1.09	0.26	0	7	21.5	0.489	0	50.6	134	3.73347	0	2.43	0	4.25	0	3680	6110	0	13.88	1	13.01	21.5	0	1.64	2	7	0	-8.93926	4	2.96326
V	-4.469	-4.362	3.63269	-9.08663	5	2.07	8.32	128	1.71	31	0.68	65.2816	13.8449	47	3400	229	24.89	2183	160	1.09	0.26	0	7	21.5	0.489	0	50.6	134	3.73347	0	2.43	0	4.25	0	3680	6110	0	13.88	1	13.01	21.5	0	1.64	2	7	0	-8.93926	4	2.96326
V	-4.469	-4.362	3.63269	-9.08663	5	2.07	8.32	128	1.71	31	0.68	65.2816	13.8449	47	3400	229	24.89	2183	160	1.09	0.26	0	7	21.5	0.489	0	50.6	134	3.73347	0	2.43	0	4.25	0	3680	6110	0	13.88	1	13.01	21.5	0	1.64	2	7	0	-8.93926	4	2.96326
V	-4.469	-4.362	3.63269	-9.08663	5	2.07	8.32	128	1.71	31	0.68	65.2816	13.8449	47	3400	229	24.89	2183	160	1.09	0.26	0	7	21.5	0.489	0	50.6	134	3.73347	0	2.43	0	4.25	0	3680	6110	0	13.88	1	13.01	21.5	0	1.64	2	7	0	-8.93926	4	2.96326
Nb	-4.617	-4.512	3.88661	-10.1131	5	2.18	10.83	105	1.98	54	0.78	50.5728	18.0021	38	8800	229	24.6	2750	170	1.23	0.51	0	7	30	0.265	0	86.1	143	4.17399	0	2.76	0	4.05	0	5017	8570	0	18.15	1	18.18	30	0	1.64	1	6	0	-10.0933	5	3.3129
Nb	-4.617	-4.512	3.88661	-10.1131	5	2.18	10.83	105	1.98	54	0.78	50.5728	18.0021	38	8800	229	24.6	2750	170	1.23	0.51	0	7	30	0.265	0	86.1	143	4.17399	0	2.76	0	4.05	0	5017	8570	0	18.15	1	18.18	30	0	1.64	1	6	0	-10.0933	5	3.3129
Nb	-4.617	-4.512	3.88661	-10.1131	5	2.18	10.83	105	1.98	54	0.78	50.5728	18.0021	38	8800	229	24.6	2750	170	1.23	0.51	0	7	30	0.265	0	86.1	143	4.17399	0	2.76	0	4.05	0	5017	8570	0	18.15	1	18.18	30	0	1.64	1	6	0	-10.0933	5	3.3129
Nb	-4.617	-4.512	3.88661	-10.1131	5	2.18	10.83	105	1.98	54	0.78	50.5728	18.0021	38	8800	229	24.6	2750	170	1.23	0.51	0	7	30	0.265	0	86.1	143	4.17399	0	2.76	0	4.05	0	5017	8570	0	18.15	1	18.18	30	0	1.64	1	6	0	-10.0933	5	3.3129
Nb	-4.617	-4.512	3.88661	-10.1131	5	2.18	10.83	105	1.98	54	0.78	50.5728	18.0021	38	8800	229	24.6	2750	170	1.23	0.51	0	7	30	0.265	0	86.1	143	4.17399	0	2.76	0	4.05	0	5017	8570	0	18.15	1	18.18	30	0	1.64	1	6	0	-10.0933	5	3.3129
Nb	-4.617	-4.512	3.88661	-10.1131	5	2.18	10.83	105	1.98	54	0.78	50.5728	18.0021	38	8800	229	24.6	2750	170	1.23	0.51	0	7	30	0.265	0	86.1	143	4.17399	0	2.76	0	4.05	0	5017	8570	0	18.15	1	18.18	30	0	1.64	1	6	0	-10.0933	5	3.3129
Nb	-4.617	-4.512	3.88661	-10.1131	5	2.18	10.83	105	1.98	54	0.78	50.5728	18.0021	38	8800	229	24.6	2750	170	1.23	0.51	0	7	30	0.265	0	86.1	143	4.17399	0	2.76	0	4.05	0	5017	8570	0	18.15	1	18.18	30	0	1.64	1	6	0	-10.0933	5	3.3129
Nb	-4.617	-4.512	3.88661	-10.1131	5	2.18	10.83	105	1.98	54	0.78	50.5728	18.0021	38	8800	229	24.6	2750	170	1.23	0.51	0	7	30	0.265	0	86.1	143	4.17399	0	2.76	0	4.05	0	5017	8570	0	18.15	1	18.18	30	0	1.64	1	6	0	-10.0933	5	3.3129
Ta	-3.652	-3.546	4.01772	-11.8555	5	2.22	10.85	186	2	57	0.78	48.272	18.0467	69	4800	229	25.36	3290	200	1.25	0.605	0	7	36.57	0.14	0	31	145	4.16939	0	2.79	0	4.05	0	5731	16650	0	17.65	1	18.12	36.57	0	1.63	2	7	14	-11.8514	6	3.30925
Ta	-3.652	-3.546	4.01772	-11.8555	5	2.22	10.85	186	2	57	0.78	48.272	18.0467	69	4800	229	25.36	3290	200	1.25	0.605	0	7	36.57	0.14	0	31	145	4.16939	0	2.79	0	4.05	0	5731	16650	0	17.65	1	18.12	36.57	0	1.63	2	7	14	-11.8514	6	3.30925
Ta	-3.652	-3.546	4.01772	-11.8555	5	2.22	10.85	186	2	57	0.78	48.272	18.0467	69	4800	229	25.36	3290	200	1.25	0.605	0	7	36.57	0.14	0	31	145	4.16939	0	2.79	0	4.05	0	5731	16650	0	17.65	1	18.12	36.57	0	1.63	2	7	14	-11.8514	6	3.30925
Ta	-3.652	-3.546	4.01772	-11.8555	5	2.22	10.85	186	2	57	0.78	48.272	18.0467	69	4800	229	25.36	3290	200	1.25	0.605	0	7	36.57	0.14	0	31	145	4.16939	0	2.79	0	4.05	0	5731	16650	0	17.65	1	18.12	36.57	0	1.63	2	7	14	-11.8514	6	3.30925
Ta	-3.652	-3.546	4.01772	-11.8555	5	2.22	10.85	186	2	57	0.78	48.272	18.0467	69	4800	229	25.36	3290	200	1.25	0.605	0	7	36.57	0.14	0	31	145	4.16939	0	2.79	0	4.05	0	5731	16650	0	17.65	1	18.12	36.57	0	1.63	2	7	14	-11.8514	6	3.30925
Ta	-3.652	-3.546	4.01772	-11.8555	5	2.22	10.85	186	2	57	0.78	48.272	18.0467	69	4800	229	25.36	3290	200	1.25	0.605	0	7	36.57	0.14	0	31	145	4.16939	0	2.79	0	4.05	0	5731	16650	0	17.65	1	18.12	36.57	0	1.63	2	7	14	-11.8514	6	3.30925
Ta	-3.652	-3.546	4.01772	-11.8555	5	2.22	10.85	186	2	57	0.78	48.272	18.0467	69	4800	229	25.36	3290	200	1.25	0.605	0	7	36.57	0.14	0	31	145	4.16939	0	2.79	0	4.05	0	5731	16650	0	17.65	1	18.12	36.57	0	1.63	2	7	14	-11.8514	6	3.30925
Ta	-3.652	-3.546	4.01772	-11.8555	5	2.22	10.85	186	2	57	0.78	48.272	18.0467	69	4800	229	25.36	3290	200	1.25	0.605	0	7	36.57	0.14	0	31	145	4.16939	0	2.79	0	4.05	0	5731	16650	0	17.65	1	18.12	36.57	0	1.63	2	7	14	-11.8514	6	3.30925
Cr	-4.417	-4.352	3.71612	-9.6367	3	2.06	7.23	279	1.66	94	0.94	30.959	12.0929	115	4100	229	23.35	2180	160	1.07	0.25	0	6	21	0.449	0	64.3	130	3.55056	0	2.44	0	4.65	0	2944	7140	0	12.01	1	11.19	21	0	1.73	1	5	0	-9.50572	4	2.81808
Cr	-4.417	-4.352	3.71612	-9.6367	3	2.06	7.23	279	1.66	94	0.94	30.959	12.0929	115	4100	229	23.35	2180	160	1.07	0.25	0	6	21	0.449	0	64.3	130	3.55056	0	2.44	0	4.65	0	2944	7140	0	12.01	1	11.19	21	0	1.73	1	5	0	-9.50572	4	2.81808
Cr	-4.417	-4.352	3.71612	-9.6367	3	2.06	7.23	279	1.66	94	0.94	30.959	12.0929	115	4100	229	23.35	2180	160	1.07	0.25	0	6	21	0.449	0	64.3	130	3.55056	0	2.44	0	4.65	0	2944	7140	0	12.01	1	11.19	21	0	1.73	1	5	0	-9.50572	4	2.81808
Cr	-4.417	-4.352	3.71612	-9.6367	3	2.06	7.23	279	1.66	94	0.94	30.959	12.0929	115	4100	229	23.35	2180	160	1.07	0.25	0	6	21	0.449	0	64.3	130	3.55056	0	2.44	0	4.65	0	2944	7140	0	12.01	1	11.19	21	0	1.73	1	5	0	-9.50572	4	2.81808
Cr	-4.417	-4.352	3.71612	-9.6367	3	2.06	7.23	279	1.66	94	0.94	30.959	12.0929	115	4100	229	23.35	2180	160	1.07	0.25	0	6	21	0.449	0	64.3	130	3.55056	0	2.44	0	4.65	0	2944	7140	0	12.01	1	11.19	21	0	1.73	1	5	0	-9.50572	4	2.81808
Cr	-4.417	-4.352	3.71612	-9.6367	3	2.06	7.23	279	1.66	94	0.94	30.959	12.0929	115	4100	229	23.35	2180	160	1.07	0.25	0	6	21	0.449	0	64.3	130	3.55056	0	2.44	0	4.65	0	2944	7140	0	12.01	1	11.19	21	0	1.73	1	5	0	-9.50572	4	2.81808
Cr	-4.417	-4.352	3.71612	-9.6367	3	2.06	7.23	279	1.66	94	0.94	30.959	12.0929	115	4100	229	23.35	2180	160	1.07	0.25	0	6	21	0.449	0	64.3	130	3.55056	0	2.44	0	4.65	0	2944	7140	0	12.01	1	11.19	21	0	1.73	1	5	0	-9.50572	4	2.81808
Cr	-4.417	-4.352	3.71612	-9.6367	3	2.06	7.23	279	1.66	94	0.94	30.959	12.0929	115	4100	229	23.35	2180	160	1.07	0.25	0	6	21	0.449	0	64.3	130	3.55056	0	2.44	0	4.65	0	2944	7140	0	12.01	1	11.19	21	0	1.73	1	5	0	-9.50572	4	2.81808
Cr	-4.417	-4.352	3.71612	-9.6367	3	2.06	7.23	279	1.66	94	0.94	30.959	12.0929	115	4100	229	23.35	2180	160	1.07	0.25	0	6	21	0.449	0	64.3	130	3.55056	0	2.44	0	4.65	0	2944	7140	0	12.01	1	11.19	21	0	1.73	1	5	0	-9.50572	4	2.81808
Cr	-4.417	-4.352	3.71612	-9.6367	3	2.06	7.23	279	1.66	94	0.94	30.959	12.0929	115	4100	229	23.35	2180	160	1.07	0.25	0	6	21	0.449	0	64.3	130	3.55056	0	2.44	0	4.65	0	2944	7140	0	12.01	1	11.19	21	0	1.73	1	5	0	-9.50572	4	2.81808
Cr	-4.417	-4.352	3.71612	-9.6367	3	2.06	7.23	279	1.66	94	0.94	30.959	12.0929	115	4100	229	23.35	2180	160	1.07	0.25	0	6	21	0.449	0	64.3	130	3.55056	0	2.44	0	4.65	0	2944	7140	0	12.01	1	11.19	21	0	1.73	1	5	0	-9.50572	4	2.81808
Cr	-4.417	-4.352	3.71612	-9.6367	3	2.06	7.23	279	1.66	94	0.94	30.959	12.0929	115	4100	229	23.35	2180	160	1.07	0.25	0	6	21	0.449	0	64.3	130	3.55056	0	2.44	0	4.65	0	2944	7140	0	12.01	1	11.19	21	0	1.73	1	5	0	-9.50572	4	2.81808
Cr	-4.417	-4.352	3.71612	-9.6367	3	2.06	7.23	279	1.66	94	0.94	30.959	12.0929	115	4100	229	23.35	2180	160	1.07	0.25	0	6	21	0.449	0	64.3	130	3.55056	0	2.44	0	4.65	0	2944	7140	0	12.01	1	11.19	21	0	1.73	1	5	0	-9.50572	4	2.81808
Cr	-4.417	-4.352	3.71612	-9.6367	3	2.06	7.23	279	1.66	94	0.94	30.959	12.0929	115	4100	229	23.35	2180	160	1.07	0.25	0	6	21	0.449	0	64.3	130	3.55056	0	2.44	0	4.65	0	2944	7140	0	12.01	1	11.19	21	0	1.73	1	5	0	-9.50572	4	2.81808
Cr	-4.417	-4.352	3.71612	-9.6367	3	2.06	7.23	279	1.66	94	0.94	30.959	12.0929	115	4100	229	23.35	2180	160	1.07	0.25	0	6	21	0.449	0	64.3	130	3.55056	0	2.44	0	4.65	0	2944	7140	0	12.01	1	11.19	21	0	1.73	1	5	0	-9.50572	4	2.81808
Cr	-4.417	-4.352	3.71612	-9.6367	3	2.06	7.23	279	1.66	94	0.94	30.959	12.0929	115	4100	229	23.35	2180	160	1.07	0.25	0	6	21	0.449	0	64.3	130	3.55056	0	2.44	0	4.65	0	2944	7140	0	12.01	1	11.19	21	0	1.73	1	5	0	-9.50572	4	2.81808
Cr	-4.417	-4.352	3.71612	-9.6367	3	2.06	7.23	279	1.66	94	0.94	30.959	12.0929	115	4100	229	23.35	2180	160	1.07	0.25	0	6	21	0.449	0	64.3	130	3.55056	0	2.44	0	4.65	0	2944	7140	0	12.01	1	11.19	21	0	1.73	1	5	0	-9.50572	4	2.81808
Mo	-4.234	-4.079	3.92237	-10.8623	4	2.17	9.38	329	1.9	139	0.79	40.33	15.5009	20	5300	229	24.06	2896	230	1.22	0.49	0	6	37.48	0.251	0	71.9	139	3.974	0	2.72	0	4.65	0	4912	10280	0	15.59	1	15.69	37.48	0	1.77	1	5	0	-10.8461	5	3.15416
Mo	-4.234	-4.079	3.92237	-10.8623	4	2.17	9.38	329	1.9	139	0.79	40.33	15.5009	20	5300	229	24.06	2896	230	1.22	0.49	0	6	37.48	0.251	0	71.9	139	3.974	0	2.72	0	4.65	0	4912	10280	0	15.59	1	15.69	37.48	0	1.77	1	5	0	-10.8461	5	3.15416
Mo	-4.234	-4.079	3.92237	-10.8623	4	2.17	9.38	329	1.9	139	0.79	40.33	15.5009	20	5300	229	24.06	2896	230	1.22	0.49	0	6	37.48	0.251	0	71.9	139	3.974	0	2.72	0	4.65	0	4912	10280	0	15.59	1	15.69	37.48	0	1.77	1	5	0	-10.8461	5	3.15416
Mo	-4.234	-4.079	3.92237	-10.8623	4	2.17	9.38	329	1.9	139	0.79	40.33	15.5009	20	5300	229	24.06	2896	230	1.22	0.49	0	6	37.48	0.251	0	71.9	139	3.974	0	2.72	0	4.65	0	4912	10280	0	15.59	1	15.69	37.48	0	1.77	1	5	0	-10.8461	5	3.15416
Mo	-4.234	-4.079	3.92237	-10.8623	4	2.17	9.38	329	1.9	139	0.79	40.33	15.5009	20	5300	229	24.06	2896	230	1.22	0.49	0	6	37.48	0.251	0	71.9	139	3.974	0	2.72	0	4.65	0	4912	10280	0	15.59	1	15.69	37.48	0	1.77	1	5	0	-10.8461	5	3.15416
Mo	-4.234	-4.079	3.92237	-10.8623	4	2.17	9.38	329	1.9	139	0.79	40.33	15.5009	20	5300	229	24.06	2896	230	1.22	0.49	0	6	37.48	0.251	0	71.9	139	3.974	0	2.72	0	4.65	0	4912	10280	0	15.59	1	15.69	37.48	0	1.77	1	5	0	-10.8461	5	3.15416
Mo	-4.234	-4.079	3.92237	-10.8623	4	2.17	9.38	329	1.9	139	0.79	40.33	15.5009	20	5300	229	24.06	2896	230	1.22	0.49	0	6	37.48	0.251	0	71.9	139	3.974	0	2.72	0	4.65	0	4912	10280	0	15.59	1	15.69	37.48	0	1.77	1	5	0	-10.8461	5	3.15416
Mo	-4.234	-4.079	3.92237	-10.8623	4	2.17	9.38	329	1.9	139	0.79	40.33	15.5009	20	5300	229	24.06	2896	230	1.22	0.49	0	6	37.48	0.251	0	71.9	139	3.974	0	2.72	0	4.65	0	4912	10280	0	15.59	1	15.69	37.48	0	1.77	1	5	0	-10.8461	5	3.15416
Mo	-4.234	-4.079	3.92237	-10.8623	4	2.17	9.38	329	1.9	139	0.79	40.33	15.5009	20	5300	229	24.06	2896	230	1.22	0.49	0	6	37.48	0.251	0	71.9	139	3.974	0	2.72	0	4.65	0	4912	10280	0	15.59	1	15.69	37.48	0	1.77	1	5	0	-10.8461	5	3.15416
Mo	-4.234	-4.079	3.92237	-10.8623	4	2.17	9.38	329	1.9	139	0.79	40.33	15.5009	20	5300	229	24.06	2896	230	1.22	0.49	0	6	37.48	0.251	0	71.9	139	3.974	0	2.72	0	4.65	0	4912	10280	0	15.59	1	15.69	37.48	0	1.77	1	5	0	-10.8461	5	3.15416
Mo	-4.234	-4.079	3.92237	-10.8623	4	2.17	9.38	329	1.9	139	0.79	40.33	15.5009	20	5300	229	24.06	2896	230	1.22	0.49	0	6	37.48	0.251	0	71.9	139	3.974	0	2.72	0	4.65	0	4912	10280	0	15.59	1	15.69	37.48	0	1.77	1	5	0	-10.8461	5	3.15416
Mo	-4.234	-4.079	3.92237	-10.8623	4	2.17	9.38	329	1.9	139	0.79	40.33	15.5009	20	5300	229	24.06	2896	230	1.22	0.49	0	6	37.48	0.251	0	71.9	139	3.974	0	2.72	0	4.65	0	4912	10280	0	15.59	1	15.69	37.48	0	1.77	1	5	0	-10.8461	5	3.15416
Mo	-4.234	-4.079	3.92237	-10.8623	4	2.17	9.38	329	1.9	139	0.79	40.33	15.5009	20	5300	229	24.06	2896	230	1.22	0.49	0	6	37.48	0.251	0	71.9	139	3.974	0	2.72	0	4.65	0	4912	10280	0	15.59	1	15.69	37.48	0	1.77	1	5	0	-10.8461	5	3.15416
Mo	-4.234	-4.079	3.92237	-10.8623	4	2.17	9.38	329	1.9	139	0.79	40.33	15.5009	20	5300	229	24.06	2896	230	1.22	0.49	0	6	37.48	0.251	0	71.9	139	3.974	0	2.72	0	4.65	0	4912	10280	0	15.59	1	15.69	37.48	0	1.77	1	5	0	-10.8461	5	3.15416
Mo	-4.234	-4.079	3.92237	-10.8623	4	2.17	9.38	329	1.9	139	0.79	40.33	15.5009	20	5300	229	24.06	2896	230	1.22	0.49	0	6	37.48	0.251	0	71.9	139	3.974	0	2.72	0	4.65	0	4912	10280	0	15.59	1	15.69	37.48	0	1.77	1	5	0	-10.8461	5	3.15416
Mo	-4.234	-4.079	3.92237	-10.8623	4	2.17	9.38	329	1.9	139	0.79	40.33	15.5009	20	5300	229	24.06	2896	230	1.22	0.49	0	6	37.48	0.251	0	71.9	139	3.974	0	2.72	0	4.65	0	4912	10280	0	15.59	1	15.69	37.48	0	1.77	1	5	0	-10.8461	5	3.15416
Mo	-4.234	-4.079	3.92237	-10.8623	4	2.17	9.38	329	1.9	139	0.79	40.33	15.5009	20	5300	229	24.06	2896	230	1.22	0.49	0	6	37.48	0.251	0	71.9	139	3.974	0	2.72	0	4.65	0	4912	10280	0	15.59	1	15.69	37.48	0	1.77	1	5	0	-10.8461	5	3.15416
W	-4.507	-4.408	4.39757	-12.9596	4	2.18	9.47	411	1.93	170	0.8	38.2	15.8587	161	4300	229	24.27	3695	310	1.22	0.59	0	6	52.31	0.132	0	78.6	135	4.00416	0	2.735	0	4.8	0	5828	19250	0	15.85	1	16.05	52.31	0	1.81	2	6	14	-12.9588	6	3.17811
W	-4.507	-4.408	4.39757	-12.9596	4	2.18	9.47	411	1.93	170	0.8	38.2	15.8587	161	4300	229	24.27	3695	310	1.22	0.59	0	6	52.31	0.132	0	78.6	135	4.00416	0	2.735	0	4.8	0	5828	19250	0	15.85	1	16.05	52.31	0	1.81	2	6	14	-12.9588	6	3.17811
W	-4.507	-4.408	4.39757	-12.9596	4	2.18	9.47	411	1.93	170	0.8	38.2	15.8587	161	4300	229	24.27	3695	310	1.22	0.59	0	6	52.31	0.132	0	78.6	135	4.00416	0	2.735	0	4.8	0	5828	19250	0	15.85	1	16.05	52.31	0	1.81	2	6	14	-12.9588	6	3.17811
W	-4.507	-4.408	4.39757	-12.9596	4	2.18	9.47	411	1.93	170	0.8	38.2	15.8587	161	4300	229	24.27	3695	310	1.22	0.59	0	6	52.31	0.132	0	78.6	135	4.00416	0	2.735	0	4.8	0	5828	19250	0	15.85	1	16.05	52.31	0	1.81	2	6	14	-12.9588	6	3.17811
W	-4.507	-4.408	4.39757	-12.9596	4	2.18	9.47	411	1.93	170	0.8	38.2	15.8587	161	4300	229	24.27	3695	310	1.22	0.59	0	6	52.31	0.132	0	78.6	135	4.00416	0	2.735	0	4.8	0	5828	19250	0	15.85	1	16.05	52.31	0	1.81	2	6	14	-12.9588	6	3.17811
W	-4.507	-4.408	4.39757	-12.9596	4	2.18	9.47	411	1.93	170	0.8	38.2	15.8587	161	4300	229	24.27	3695	310	1.22	0.59	0	6	52.31	0.132	0	78.6	135	4.00416	0	2.735	0	4.8	0	5828	19250	0	15.85	1	16.05	52.31	0	1.81	2	6	14	-12.9588	6	3.17811
W	-4.507	-4.408	4.39757	-12.9596	4	2.18	9.47	411	1.93	170	0.8	38.2	15.8587	161	4300	229	24.27	3695	310	1.22	0.59	0	6	52.31	0.132	0	78.6	135	4.00416	0	2.735	0	4.8	0	5828	19250	0	15.85	1	16.05	52.31	0	1.81	2	6	14	-12.9588	6	3.17811
W	-4.507	-4.408	4.39757	-12.9596	4	2.18	9.47	411	1.93	170	0.8	38.2	15.8587	161	4300	229	24.27	3695	310	1.22	0.59	0	6	52.31	0.132	0	78.6	135	4.00416	0	2.735	0	4.8	0	5828	19250	0	15.85	1	16.05	52.31	0	1.81	2	6	14	-12.9588	6	3.17811
W	-4.507	-4.408	4.39757	-12.9596	4	2.18	9.47	411	1.93	170	0.8	38.2	15.8587	161	4300	229	24.27	3695	310	1.22	0.59	0	6	52.31	0.132	0	78.6	135	4.00416	0	2.735	0	4.8	0	5828	19250	0	15.85	1	16.05	52.31	0	1.81	2	6	14	-12.9588	6	3.17811
W	-4.507	-4.408	4.39757	-12.9596	4	2.18	9.47	411	1.93	170	0.8	38.2	15.8587	161	4300	229	24.27	3695	310	1.22	0.59	0	6	52.31	0.132	0	78.6	135	4.00416	0	2.735	0	4.8	0	5828	19250	0	15.85	1	16.05	52.31	0	1.81	2	6	14	-12.9588	6	3.17811
W	-4.507	-4.408	4.39757	-12.9596	4	2.18	9.47	411	1.93	170	0.8	38.2	15.8587	161	4300	229	24.27	3695	310	1.22	0.59	0	6	52.31	0.132	0	78.6	135	4.00416	0	2.735	0	4.8	0	5828	19250	0	15.85	1	16.05	52.31	0	1.81	2	6	14	-12.9588	6	3.17811
W	-4.507	-4.408	4.39757	-12.9596	4	2.18	9.47	411	1.93	170	0.8	38.2	15.8587	161	4300	229	24.27	3695	310	1.22	0.59	0	6	52.31	0.132	0	78.6	135	4.00416	0	2.735	0	4.8	0	5828	19250	0	15.85	1	16.05	52.31	0	1.81	2	6	14	-12.9588	6	3.17811
W	-4.507	-4.408	4.39757	-12.9596	4	2.18	9.47	411	1.93	170	0.8	38.2	15.8587	161	4300	229	24.27	3695	310	1.22	0.59	0	6	52.31	0.132	0	78.6	135	4.00416	0	2.735	0	4.8	0	5828	19250	0	15.85	1	16.05	52.31	0	1.81	2	6	14	-12.9588	6	3.17811
W	-4.507	-4.408	4.39757	-12.9596	4	2.18	9.47	411	1.93	170	0.8	38.2	15.8587	161	4300	229	24.27	3695	310	1.22	0.59	0	6	52.31	0.132	0	78.6	135	4.00416	0	2.735	0	4.8	0	5828	19250	0	15.85	1	16.05	52.31	0	1.81	2	6	14	-12.9588	6	3.17811
W	-4.507	-4.408	4.39757	-12.9596	4	2.18	9.47	411	1.93	170	0.8	38.2	15.8587	161	4300	229	24.27	3695	310	1.22	0.59	0	6	52.31	0.132	0	78.6	135	4.00416	0	2.735	0	4.8	0	5828	19250	0	15.85	1	16.05	52.31	0	1.81	2	6	14	-12.9588	6	3.17811
W	-4.507	-4.408	4.39757	-12.9596	4	2.18	9.47	411	1.93	170	0.8	38.2	15.8587	161	4300	229	24.27	3695	310	1.22	0.59	0	6	52.31	0.132	0	78.6	135	4.00416	0	2.735	0	4.8	0	5828	19250	0	15.85	1	16.05	52.31	0	1.81	2	6	14	-12.9588	6	3.17811
Mn	-4.444	-1.061	3.45857	-9.15925	4	2.05	7.35	198	1.61	7.8	0.67	51.21	12.2127	78	1800	217	26.32	1519	120	0.99	0.23	0	5	12.91	0.479	0	0	132	3.47466	0	2.22	0	4.45	0	2334	7470	0	12.2	1	10.4876	12.91	0.000310121	1.61	2	5	0	-9.02057	4	2.75784
Mn	-4.444	-1.061	3.45857	-9.15925	4	2.05	7.35	198	1.61	7.8	0.67	51.21	12.2127	78	1800	217	26.32	1519	120	0.99	0.23	0	5	12.91	0.479	0	0	132	3.47466	0	2.22	0	4.45	0	2334	7470	0	12.2	1	10.4876	12.91	0.000310121	1.61	2	5	0	-9.02057	4	2.75784
Mn	-4.444	-1.061	3.45857	-9.15925	4	2.05	7.35	198	1.61	7.8	0.67	51.21	12.2127	78	1800	217	26.32	1519	120	0.99	0.23	0	5	12.91	0.479	0	0	132	3.47466	0	2.22	0	4.45	0	2334	7470	0	12.2	1	10.4876	12.91	0.000310121	1.61	2	5	0	-9.02057	4	2.75784
Mn	-4.444	-1.061	3.45857	-9.15925	4	2.05	7.35	198	1.61	7.8	0.67	51.21	12.2127	78	1800	217	26.32	1519	120	0.99	0.23	0	5	12.91	0.479	0	0	132	3.47466	0	2.22	0	4.45	0	2334	7470	0	12.2	1	10.4876	12.91	0.000310121	1.61	2	5	0	-9.02057	4	2.75784
Mn	-4.444	-1.061	3.45857	-9.15925	4	2.05	7.35	198	1.61	7.8	0.67	51.21	12.2127	78	1800	217	26.32	1519	120	0.99	0.23	0	5	12.91	0.479	0	0	132	3.47466	0	2.22	0	4.45	0	2334	7470	0	12.2	1	10.4876	12.91	0.000310121	1.61	2	5	0	-9.02057	4	2.75784
Mn	-4.444	-1.061	3.45857	-9.15925	4	2.05	7.35	198	1.61	7.8	0.67	51.21	12.2127	78	1800	217	26.32	1519	120	0.99	0.23	0	5	12.91	0.479	0	0	132	3.47466	0	2.22	0	4.45	0	2334	7470	0	12.2	1	10.4876	12.91	0.000310121	1.61	2	5	0	-9.02057	4	2.75784
Mn	-4.444	-1.061	3.45857	-9.15925	4	2.05	7.35	198	1.61	7.8	0.67	51.21	12.2127	78	1800	217	26.32	1519	120	0.99	0.23	0	5	12.91	0.479	0	0	132	3.47466	0	2.22	0	4.45	0	2334	7470	0	12.2	1	10.4876	12.91	0.000310121	1.61	2	5	0	-9.02057	4	2.75784
Mn	-4.444	-1.061	3.45857	-9.15925	2	2.05	7.35	198	1.61	7.8	0.97	15.64	12.2127	78	1800	217	26.32	1519	120	0.99	0.23	0	5	12.91	0.479	0	0	132	3.47466	0	2.22	0	4.45	0	2334	7470	0	12.2	1	10.4876	12.91	0.000310121	1.61	2	5	0	-9.02057	4	2.75784
Mn	-4.444	-1.061	3.45857	-9.15925	4	2.05	7.35	198	1.61	7.8	0.67	51.21	12.2127	78	1800	217	26.32	1519	120	0.99	0.23	0	5	12.91	0.479	0	0	132	3.47466	0	2.22	0	4.45	0	2334	7470	0	12.2	1	10.4876	12.91	0.000310121	1.61	2	5	0	-9.02057	4	2.75784
Mn	-4.444	-1.061	3.45857	-9.15925	2	2.05	7.35	198	1.61	7.8	0.97	15.64	12.2127	78	1800	217	26.32	1519	120	0.99	0.23	0	5	12.91	0.479	0	0	132	3.47466	0	2.22	0	4.45	0	2334	7470	0	12.2	1	10.4876	12.91	0.000310121	1.61	2	5	0	-9.02057	4	2.75784
Mn	-4.444	-1.061	3.45857	-9.15925	4	2.05	7.35	198	1.61	7.8	0.67	51.21	12.2127	78	1800	217	26.32	1519	120	0.99	0.23	0	5	12.91	0.479	0	0	132	3.47466	0	2.22	0	4.45	0	2334	7470	0	12.2	1	10.4876	12.91	0.000310121	1.61	2	5	0	-9.02057	4	2.75784
Mn	-4.444	-1.061	3.45857	-9.15925	2	2.05	7.35	198	1.61	7.8	0.97	15.64	12.2127	78	1800	217	26.32	1519	120	0.99	0.23	0	5	12.91	0.479	0	0	132	3.47466	0	2.22	0	4.45	0	2334	7470	0	12.2	1	10.4876	12.91	0.000310121	1.61	2	5	0	-9.02057	4	2.75784
Mn	-4.444	-1.061	3.45857	-9.15925	2	2.05	7.35	198	1.61	7.8	0.97	15.64	12.2127	78	1800	217	26.32	1519	120	0.99	0.23	0	5	12.91	0.479	0	0	132	3.47466	0	2.22	0	4.45	0	2334	7470	0	12.2	1	10.4876	12.91	0.000310121	1.61	2	5	0	-9.02057	4	2.75784
Mn	-4.444	-1.061	3.45857	-9.15925	2	2.05	7.35	198	1.61	7.8	0.97	15.64	12.2127	78	1800	217	26.32	1519	120	0.99	0.23	0	5	12.91	0.479	0	0	132	3.47466	0	2.22	0	4.45	0	2334	7470	0	12.2	1	10.4876	12.91	0.000310121	1.61	2	5	0	-9.02057	4	2.75784
Mn	-4.444	-1.061	3.45857	-9.15925	2	2.05	7.35	198	1.61	7.8	0.97	15.64	12.2127	78	1800	217	26.32	1519	120	0.99	0.23	0	5	12.91	0.479	0	0	132	3.47466	0	2.22	0	4.45	0	2334	7470	0	12.2	1	10.4876	12.91	0.000310121	1.61	2	5	0	-9.02057	4	2.75784
Mn	-4.444	-1.061	3.45857	-9.15925	2	2.05	7.35	198	1.61	7.8	0.97	15.64	12.2127	78	1800	217	26.32	1519	120	0.99	0.23	0	5	12.91	0.479	0	0	132	3.47466	0	2.22	0	4.45	0	2334	7470	0	12.2	1	10.4876	12.91	0.000310121	1.61	2	5	0	-9.02057	4	2.75784
Mn	-4.444	-1.061	3.45857	-9.15925	4	2.05	7.35	198	1.61	7.8	0.67	51.21	12.2127	78	1800	217	26.32	1519	120	0.99	0.23	0	5	12.91	0.479	0	0	132	3.47466	0	2.22	0	4.45	0	2334	7470	0	12.2	1	10.4876	12.91	0.000310121	1.61	2	5	0	-9.02057	4	2.75784
Mn	-4.444	-1.061	3.45857	-9.15925	2	2.05	7.35	198	1.61	7.8	0.97	15.64	12.2127	78	1800	217	26.32	1519	120	0.99	0.23	0	5	12.91	0.479	0	0	132	3.47466	0	2.22	0	4.45	0	2334	7470	0	12.2	1	10.4876	12.91	0.000310121	1.61	2	5	0	-9.02057	4	2.75784
Mn	-4.444	-1.061	3.45857	-9.15925	2	2.05	7.35	198	1.61	7.8	0.97	15.64	12.2127	78	1800	217	26.32	1519	120	0.99	0.23	0	5	12.91	0.479	0	0	132	3.47466	0	2.22	0	4.45	0	2334	7470	0	12.2	1	10.4876	12.91	0.000310121	1.61	2	5	0	-9.02057	4	2.75784
Mn	-4.444	-1.061	3.45857	-9.15925	4	2.05	7.35	198	1.61	7.8	0.67	51.21	12.2127	78	1800	217	26.32	1519	120	0.99	0.23	0	5	12.91	0.479	0	0	132	3.47466	0	2.22	0	4.45	0	2334	7470	0	12.2	1	10.4876	12.91	0.000310121	1.61	2	5	0	-9.02057	4	2.75784
Mn	-4.444	-1.061	3.45857	-9.15925	2	2.05	7.35	198	1.61	7.8	0.97	15.64	12.2127	78	1800	217	26.32	1519	120	0.99	0.23	0	5	12.91	0.479	0	0	132	3.47466	0	2.22	0	4.45	0	2334	7470	0	12.2	1	10.4876	12.91	0.000310121	1.61	2	5	0	-9.02057	4	2.75784
Tc	-3.935	-0.87	4.13743	-10.3585	4	2.16	8.63	78	1.83	51	0.785	41	14.151	64.50420054200542	3781.2021857923496	194	24.962780327868856	2430	129.03490683229813	1.16	0.455	0	5	33.29	0.3962699453551912	0	53	136	3.85165	0	2.65	0	5.3	0	4538	11500	0	14.22	1	14.285	33.29	0	1.81	2	5	0	-10.3552	5	3.05706
Tc	-3.935	-0.87	4.13743	-10.3585	4	2.16	8.63	78	1.83	51	0.785	41	14.151	64.50420054200542	3781.2021857923496	194	24.962780327868856	2430	129.03490683229813	1.16	0.455	0	5	33.29	0.3962699453551912	0	53	136	3.85165	0	2.65	0	5.3	0	4538	11500	0	14.22	1	14.285	33.29	0	1.81	2	5	0	-10.3552	5	3.05706
Tc	-3.935	-0.87	4.13743	-10.3585	4	2.16	8.63	78	1.83	51	0.785	41	14.151	64.50420054200542	3781.2021857923496	194	24.962780327868856	2430	129.03490683229813	1.16	0.455	0	5	33.29	0.3962699453551912	0	53	136	3.85165	0	2.65	0	5.3	0	4538	11500	0	14.22	1	14.285	33.29	0	1.81	2	5	0	-10.3552	5	3.05706
Tc	-3.935	-0.87	4.13743	-10.3585	4	2.16	8.63	78	1.83	51	0.785	41	14.151	64.50420054200542	3781.2021857923496	194	24.962780327868856	2430	129.03490683229813	1.16	0.455	0	5	33.29	0.3962699453551912	0	53	136	3.85165	0	2.65	0	5.3	0	4538	11500	0	14.22	1	14.285	33.29	0	1.81	2	5	0	-10.3552	5	3.05706
Re	-5.384	-5.355	4.01254	-12.4439	4	2.16	8.86	463	1.88	48	0.77	39.1	14.7103	178	3300	194	25.48	3459	370	1.19	0.565	0	5	34.08	0.137	0	14.5	137	3.88462	0	2.68	0	5.2	0	5869	21020	0	14.71	1	14.655	34.08	0	1.85	2	5	14	-12.417	6	3.08323
Re	-5.384	-5.355	4.01254	-12.4439	4	2.16	8.86	463	1.88	48	0.77	39.1	14.7103	178	3300	194	25.48	3459	370	1.19	0.565	0	5	34.08	0.137	0	14.5	137	3.88462	0	2.68	0	5.2	0	5869	21020	0	14.71	1	14.655	34.08	0	1.85	2	5	14	-12.417	6	3.08323
Re	-5.384	-5.355	4.01254	-12.4439	4	2.16	8.86	463	1.88	48	0.77	39.1	14.7103	178	3300	194	25.48	3459	370	1.19	0.565	0	5	34.08	0.137	0	14.5	137	3.88462	0	2.68	0	5.2	0	5869	21020	0	14.71	1	14.655	34.08	0	1.85	2	5	14	-12.417	6	3.08323
Re	-5.384	-5.355	4.01254	-12.4439	4	2.16	8.86	463	1.88	48	0.77	39.1	14.7103	178	3300	194	25.48	3459	370	1.19	0.565	0	5	34.08	0.137	0	14.5	137	3.88462	0	2.68	0	5.2	0	5869	21020	0	14.71	1	14.655	34.08	0	1.85	2	5	14	-12.417	6	3.08323
Re	-5.384	-5.355	4.01254	-12.4439	4	2.16	8.86	463	1.88	48	0.77	39.1	14.7103	178	3300	194	25.48	3459	370	1.19	0.565	0	5	34.08	0.137	0	14.5	137	3.88462	0	2.68	0	5.2	0	5869	21020	0	14.71	1	14.655	34.08	0	1.85	2	5	14	-12.417	6	3.08323
Re	-5.384	-5.355	4.01254	-12.4439	4	2.16	8.86	463	1.88	48	0.77	39.1	14.7103	178	3300	194	25.48	3459	370	1.19	0.565	0	5	34.08	0.137	0	14.5	137	3.88462	0	2.68	0	5.2	0	5869	21020	0	14.71	1	14.655	34.08	0	1.85	2	5	14	-12.417	6	3.08323
Re	-5.384	-5.355	4.01254	-12.4439	4	2.16	8.86	463	1.88	48	0.77	39.1	14.7103	178	3300	194	25.48	3459	370	1.19	0.565	0	5	34.08	0.137	0	14.5	137	3.88462	0	2.68	0	5.2	0	5869	21020	0	14.71	1	14.655	34.08	0	1.85	2	5	14	-12.417	6	3.08323
Re	-5.384	-5.355	4.01254	-12.4439	4	2.16	8.86	463	1.88	48	0.77	39.1	14.7103	178	3300	194	25.48	3459	370	1.19	0.565	0	5	34.08	0.137	0	14.5	137	3.88462	0	2.68	0	5.2	0	5869	21020	0	14.71	1	14.655	34.08	0	1.85	2	5	14	-12.417	6	3.08323
Re	-5.384	-5.355	4.01254	-12.4439	4	2.16	8.86	463	1.88	48	0.77	39.1	14.7103	178	3300	194	25.48	3459	370	1.19	0.565	0	5	34.08	0.137	0	14.5	137	3.88462	0	2.68	0	5.2	0	5869	21020	0	14.71	1	14.655	34.08	0	1.85	2	5	14	-12.417	6	3.08323
Re	-5.384	-5.355	4.01254	-12.4439	4	2.16	8.86	463	1.88	48	0.77	39.1	14.7103	178	3300	194	25.48	3459	370	1.19	0.565	0	5	34.08	0.137	0	14.5	137	3.88462	0	2.68	0	5.2	0	5869	21020	0	14.71	1	14.655	34.08	0	1.85	2	5	14	-12.417	6	3.08323
Re	-5.384	-5.355	4.01254	-12.4439	4	2.16	8.86	463	1.88	48	0.77	39.1	14.7103	178	3300	194	25.48	3459	370	1.19	0.565	0	5	34.08	0.137	0	14.5	137	3.88462	0	2.68	0	5.2	0	5869	21020	0	14.71	1	14.655	34.08	0	1.85	2	5	14	-12.417	6	3.08323
Re	-5.384	-5.355	4.01254	-12.4439	4	2.16	8.86	463	1.88	48	0.77	39.1	14.7103	178	3300	194	25.48	3459	370	1.19	0.565	0	5	34.08	0.137	0	14.5	137	3.88462	0	2.68	0	5.2	0	5869	21020	0	14.71	1	14.655	34.08	0	1.85	2	5	14	-12.417	6	3.08323
Re	-5.384	-5.355	4.01254	-12.4439	4	2.16	8.86	463	1.88	48	0.77	39.1	14.7103	178	3300	194	25.48	3459	370	1.19	0.565	0	5	34.08	0.137	0	14.5	137	3.88462	0	2.68	0	5.2	0	5869	21020	0	14.71	1	14.655	34.08	0	1.85	2	5	14	-12.417	6	3.08323
Re	-5.384	-5.355	4.01254	-12.4439	4	2.16	8.86	463	1.88	48	0.77	39.1	14.7103	178	3300	194	25.48	3459	370	1.19	0.565	0	5	34.08	0.137	0	14.5	137	3.88462	0	2.68	0	5.2	0	5869	21020	0	14.71	1	14.655	34.08	0	1.85	2	5	14	-12.417	6	3.08323
Re	-5.384	-5.355	4.01254	-12.4439	4	2.16	8.86	463	1.88	48	0.77	39.1	14.7103	178	3300	194	25.48	3459	370	1.19	0.565	0	5	34.08	0.137	0	14.5	137	3.88462	0	2.68	0	5.2	0	5869	21020	0	14.71	1	14.655	34.08	0	1.85	2	5	14	-12.417	6	3.08323
Re	-5.384	-5.355	4.01254	-12.4439	4	2.16	8.86	463	1.88	48	0.77	39.1	14.7103	178	3300	194	25.48	3459	370	1.19	0.565	0	5	34.08	0.137	0	14.5	137	3.88462	0	2.68	0	5.2	0	5869	21020	0	14.71	1	14.655	34.08	0	1.85	2	5	14	-12.417	6	3.08323
Re	-5.384	-5.355	4.01254	-12.4439	4	2.16	8.86	463	1.88	48	0.77	39.1	14.7103	178	3300	194	25.48	3459	370	1.19	0.565	0	5	34.08	0.137	0	14.5	137	3.88462	0	2.68	0	5.2	0	5869	21020	0	14.71	1	14.655	34.08	0	1.85	2	5	14	-12.417	6	3.08323
Fe	-4.434	-0.943	4.01617	-8.45983	3	2.04	7.09	211	1.56	80	0.785	30.651	11.7774	82	1400	229	25.1	1811	170	0.95	0.22	0	4	13.81	0.449	0	15.7	125	3.50122	0	2.11	0	4.93	0	3134	7874	0	11.78	1	10.73	13.81	2.11066	1.77	2	4	0	-8.28548	4	2.77892
Fe	-4.434	-0.943	4.01617	-8.45983	3	2.04	7.09	211	1.56	80	0.785	30.651	11.7774	82	1400	229	25.1	1811	170	0.95	0.22	0	4	13.81	0.449	0	15.7	125	3.50122	0	2.11	0	4.93	0	3134	7874	0	11.78	1	10.73	13.81	2.11066	1.77	2	4	0	-8.28548	4	2.77892
Fe	-4.434	-0.943	4.01617	-8.45983	3	2.04	7.09	211	1.56	80	0.785	30.651	11.7774	82	1400	229	25.1	1811	170	0.95	0.22	0	4	13.81	0.449	0	15.7	125	3.50122	0	2.11	0	4.93	0	3134	7874	0	11.78	1	10.73	13.81	2.11066	1.77	2	4	0	-8.28548	4	2.77892
Fe	-4.434	-0.943	4.01617	-8.45983	3	2.04	7.09	211	1.56	80	0.785	30.651	11.7774	82	1400	229	25.1	1811	170	0.95	0.22	0	4	13.81	0.449	0	15.7	125	3.50122	0	2.11	0	4.93	0	3134	7874	0	11.78	1	10.73	13.81	2.11066	1.77	2	4	0	-8.28548	4	2.77892
Fe	-4.434	-0.943	4.01617	-8.45983	3	2.04	7.09	211	1.56	80	0.785	30.651	11.7774	82	1400	229	25.1	1811	170	0.95	0.22	0	4	13.81	0.449	0	15.7	125	3.50122	0	2.11	0	4.93	0	3134	7874	0	11.78	1	10.73	13.81	2.11066	1.77	2	4	0	-8.28548	4	2.77892
Fe	-4.434	-0.943	4.01617	-8.45983	3	2.04	7.09	211	1.56	80	0.785	30.651	11.7774	82	1400	229	25.1	1811	170	0.95	0.22	0	4	13.81	0.449	0	15.7	125	3.50122	0	2.11	0	4.93	0	3134	7874	0	11.78	1	10.73	13.81	2.11066	1.77	2	4	0	-8.28548	4	2.77892
Fe	-4.434	-0.943	4.01617	-8.45983	3	2.04	7.09	211	1.56	80	0.785	30.651	11.7774	82	1400	229	25.1	1811	170	0.95	0.22	0	4	13.81	0.449	0	15.7	125	3.50122	0	2.11	0	4.93	0	3134	7874	0	11.78	1	10.73	13.81	2.11066	1.77	2	4	0	-8.28548	4	2.77892
Fe	-4.434	-0.943	4.01617	-8.45983	3	2.04	7.09	211	1.56	80	0.785	30.651	11.7774	82	1400	229	25.1	1811	170	0.95	0.22	0	4	13.81	0.449	0	15.7	125	3.50122	0	2.11	0	4.93	0	3134	7874	0	11.78	1	10.73	13.81	2.11066	1.77	2	4	0	-8.28548	4	2.77892
Fe	-4.434	-0.943	4.01617	-8.45983	2	2.04	7.09	211	1.56	80	0.92	16.1992	11.7774	82	1400	229	25.1	1811	170	0.95	0.22	0	4	13.81	0.449	0	15.7	125	3.50122	0	2.11	0	4.93	0	3134	7874	0	11.78	1	10.73	13.81	2.11066	1.77	2	4	0	-8.28548	4	2.77892
Fe	-4.434	-0.943	4.01617	-8.45983	2	2.04	7.09	211	1.56	80	0.92	16.1992	11.7774	82	1400	229	25.1	1811	170	0.95	0.22	0	4	13.81	0.449	0	15.7	125	3.50122	0	2.11	0	4.93	0	3134	7874	0	11.78	1	10.73	13.81	2.11066	1.77	2	4	0	-8.28548	4	2.77892
Fe	-4.434	-0.943	4.01617	-8.45983	3	2.04	7.09	211	1.56	80	0.785	30.651	11.7774	82	1400	229	25.1	1811	170	0.95	0.22	0	4	13.81	0.449	0	15.7	125	3.50122	0	2.11	0	4.93	0	3134	7874	0	11.78	1	10.73	13.81	2.11066	1.77	2	4	0	-8.28548	4	2.77892
Fe	-4.434	-0.943	4.01617	-8.45983	3	2.04	7.09	211	1.56	80	0.785	30.651	11.7774	82	1400	229	25.1	1811	170	0.95	0.22	0	4	13.81	0.449	0	15.7	125	3.50122	0	2.11	0	4.93	0	3134	7874	0	11.78	1	10.73	13.81	2.11066	1.77	2	4	0	-8.28548	4	2.77892
Fe	-4.434	-0.943	4.01617	-8.45983	2	2.04	7.09	211	1.56	80	0.92	16.1992	11.7774	82	1400	229	25.1	1811	170	0.95	0.22	0	4	13.81	0.449	0	15.7	125	3.50122	0	2.11	0	4.93	0	3134	7874	0	11.78	1	10.73	13.81	2.11066	1.77	2	4	0	-8.28548	4	2.77892
Fe	-4.434	-0.943	4.01617	-8.45983	2	2.04	7.09	211	1.56	80	0.92	16.1992	11.7774	82	1400	229	25.1	1811	170	0.95	0.22	0	4	13.81	0.449	0	15.7	125	3.50122	0	2.11	0	4.93	0	3134	7874	0	11.78	1	10.73	13.81	2.11066	1.77	2	4	0	-8.28548	4	2.77892
Fe	-4.434	-0.943	4.01617	-8.45983	3	2.04	7.09	211	1.56	80	0.785	30.651	11.7774	82	1400	229	25.1	1811	170	0.95	0.22	0	4	13.81	0.449	0	15.7	125	3.50122	0	2.11	0	4.93	0	3134	7874	0	11.78	1	10.73	13.81	2.11066	1.77	2	4	0	-8.28548	4	2.77892
Fe	-4.434	-0.943	4.01617	-8.45983	2	2.04	7.09	211	1.56	80	0.92	16.1992	11.7774	82	1400	229	25.1	1811	170	0.95	0.22	0	4	13.81	0.449	0	15.7	125	3.50122	0	2.11	0	4.93	0	3134	7874	0	11.78	1	10.73	13.81	2.11066	1.77	2	4	0	-8.28548	4	2.77892
Fe	-4.434	-0.943	4.01617	-8.45983	2	2.04	7.09	211	1.56	80	0.92	16.1992	11.7774	82	1400	229	25.1	1811	170	0.95	0.22	0	4	13.81	0.449	0	15.7	125	3.50122	0	2.11	0	4.93	0	3134	7874	0	11.78	1	10.73	13.81	2.11066	1.77	2	4	0	-8.28548	4	2.77892
Fe	-4.434	-0.943	4.01617	-8.45983	2	2.04	7.09	211	1.56	80	0.92	16.1992	11.7774	82	1400	229	25.1	1811	170	0.95	0.22	0	4	13.81	0.449	0	15.7	125	3.50122	0	2.11	0	4.93	0	3134	7874	0	11.78	1	10.73	13.81	2.11066	1.77	2	4	0	-8.28548	4	2.77892
Fe	-4.434	-0.943	4.01617	-8.45983	3	2.04	7.09	211	1.56	80	0.785	30.651	11.7774	82	1400	229	25.1	1811	170	0.95	0.22	0	4	13.81	0.449	0	15.7	125	3.50122	0	2.11	0	4.93	0	3134	7874	0	11.78	1	10.73	13.81	2.11066	1.77	2	4	0	-8.28548	4	2.77892
Fe	-4.434	-0.943	4.01617	-8.45983	3	2.04	7.09	211	1.56	80	0.785	30.651	11.7774	82	1400	229	25.1	1811	170	0.95	0.22	0	4	13.81	0.449	0	15.7	125	3.50122	0	2.11	0	4.93	0	3134	7874	0	11.78	1	10.73	13.81	2.11066	1.77	2	4	0	-8.28548	4	2.77892
Fe	-4.434	-0.943	4.01617	-8.45983	3	2.04	7.09	211	1.56	80	0.785	30.651	11.7774	82	1400	229	25.1	1811	170	0.95	0.22	0	4	13.81	0.449	0	15.7	125	3.50122	0	2.11	0	4.93	0	3134	7874	0	11.78	1	10.73	13.81	2.11066	1.77	2	4	0	-8.28548	4	2.77892
Fe	-4.434	-0.943	4.01617	-8.45983	2	2.04	7.09	211	1.56	80	0.92	16.1992	11.7774	82	1400	229	25.1	1811	170	0.95	0.22	0	4	13.81	0.449	0	15.7	125	3.50122	0	2.11	0	4.93	0	3134	7874	0	11.78	1	10.73	13.81	2.11066	1.77	2	4	0	-8.28548	4	2.77892
Fe	-4.434	-0.943	4.01617	-8.45983	2	2.04	7.09	211	1.56	80	0.92	16.1992	11.7774	82	1400	229	25.1	1811	170	0.95	0.22	0	4	13.81	0.449	0	15.7	125	3.50122	0	2.11	0	4.93	0	3134	7874	0	11.78	1	10.73	13.81	2.11066	1.77	2	4	0	-8.28548	4	2.77892
Fe	-4.434	-0.943	4.01617	-8.45983	2	2.04	7.09	211	1.56	80	0.92	16.1992	11.7774	82	1400	229	25.1	1811	170	0.95	0.22	0	4	13.81	0.449	0	15.7	125	3.50122	0	2.11	0	4.93	0	3134	7874	0	11.78	1	10.73	13.81	2.11066	1.77	2	4	0	-8.28548	4	2.77892
Fe	-4.434	-0.943	4.01617	-8.45983	2	2.04	7.09	211	1.56	80	0.92	16.1992	11.7774	82	1400	229	25.1	1811	170	0.95	0.22	0	4	13.81	0.449	0	15.7	125	3.50122	0	2.11	0	4.93	0	3134	7874	0	11.78	1	10.73	13.81	2.11066	1.77	2	4	0	-8.28548	4	2.77892
Fe	-4.434	-0.943	4.01617	-8.45983	3	2.04	7.09	211	1.56	80	0.785	30.651	11.7774	82	1400	229	25.1	1811	170	0.95	0.22	0	4	13.81	0.449	0	15.7	125	3.50122	0	2.11	0	4.93	0	3134	7874	0	11.78	1	10.73	13.81	2.11066	1.77	2	4	0	-8.28548	4	2.77892
Fe	-4.434	-0.943	4.01617	-8.45983	2	2.04	7.09	211	1.56	80	0.92	16.1992	11.7774	82	1400	229	25.1	1811	170	0.95	0.22	0	4	13.81	0.449	0	15.7	125	3.50122	0	2.11	0	4.93	0	3134	7874	0	11.78	1	10.73	13.81	2.11066	1.77	2	4	0	-8.28548	4	2.77892
Fe	-4.434	-0.943	4.01617	-8.45983	3	2.04	7.09	211	1.56	80	0.785	30.651	11.7774	82	1400	229	25.1	1811	170	0.95	0.22	0	4	13.81	0.449	0	15.7	125	3.50122	0	2.11	0	4.93	0	3134	7874	0	11.78	1	10.73	13.81	2.11066	1.77	2	4	0	-8.28548	4	2.77892
Fe	-4.434	-0.943	4.01617	-8.45983	2	2.04	7.09	211	1.56	80	0.92	16.1992	11.7774	82	1400	229	25.1	1811	170	0.95	0.22	0	4	13.81	0.449	0	15.7	125	3.50122	0	2.11	0	4.93	0	3134	7874	0	11.78	1	10.73	13.81	2.11066	1.77	2	4	0	-8.28548	4	2.77892
Ru	-3.584	-0.596	4.20843	-9.27635	3	2.13	8.17	447	1.78	120	0.82	28.47	13.5679	173	8000	194	24.06	2607	220	1.145	0.45	0	4	38.59	0.238	0	101.3	134	3.7807	0	2.605	0	5.4	0	4423	12370	0	14.03	1	13.51	38.59	0	1.83	1	3	0	-9.19463	5	3.00074
Ru	-3.584	-0.596	4.20843	-9.27635	3	2.13	8.17	447	1.78	120	0.82	28.47	13.5679	173	8000	194	24.06	2607	220	1.145	0.45	0	4	38.59	0.238	0	101.3	134	3.7807	0	2.605	0	5.4	0	4423	12370	0	14.03	1	13.51	38.59	0	1.83	1	3	0	-9.19463	5	3.00074
Ru	-3.584	-0.596	4.20843	-9.27635	3	2.13	8.17	447	1.78	120	0.82	28.47	13.5679	173	8000	194	24.06	2607	220	1.145	0.45	0	4	38.59	0.238	0	101.3	134	3.7807	0	2.605	0	5.4	0	4423	12370	0	14.03	1	13.51	38.59	0	1.83	1	3	0	-9.19463	5	3.00074
Ru	-3.584	-0.596	4.20843	-9.27635	3	2.13	8.17	447	1.78	120	0.82	28.47	13.5679	173	8000	194	24.06	2607	220	1.145	0.45	0	4	38.59	0.238	0	101.3	134	3.7807	0	2.605	0	5.4	0	4423	12370	0	14.03	1	13.51	38.59	0	1.83	1	3	0	-9.19463	5	3.00074
Ru	-3.584	-0.596	4.20843	-9.27635	4	2.13	8.17	447	1.78	120	0.76	45	13.5679	173	8000	194	24.06	2607	220	1.145	0.45	0	4	38.59	0.238	0	101.3	134	3.7807	0	2.605	0	5.4	0	4423	12370	0	14.03	1	13.51	38.59	0	1.83	1	3	0	-9.19463	5	3.00074
Ru	-3.584	-0.596	4.20843	-9.27635	4	2.13	8.17	447	1.78	120	0.76	45	13.5679	173	8000	194	24.06	2607	220	1.145	0.45	0	4	38.59	0.238	0	101.3	134	3.7807	0	2.605	0	5.4	0	4423	12370	0	14.03	1	13.51	38.59	0	1.83	1	3	0	-9.19463	5	3.00074
Ru	-3.584	-0.596	4.20843	-9.27635	3	2.13	8.17	447	1.78	120	0.82	28.47	13.5679	173	8000	194	24.06	2607	220	1.145	0.45	0	4	38.59	0.238	0	101.3	134	3.7807	0	2.605	0	5.4	0	4423	12370	0	14.03	1	13.51	38.59	0	1.83	1	3	0	-9.19463	5	3.00074
Ru	-3.584	-0.596	4.20843	-9.27635	4	2.13	8.17	447	1.78	120	0.76	45	13.5679	173	8000	194	24.06	2607	220	1.145	0.45	0	4	38.59	0.238	0	101.3	134	3.7807	0	2.605	0	5.4	0	4423	12370	0	14.03	1	13.51	38.59	0	1.83	1	3	0	-9.19463	5	3.00074
Ru	-3.584	-0.596	4.20843	-9.27635	4	2.13	8.17	447	1.78	120	0.76	45	13.5679	173	8000	194	24.06	2607	220	1.145	0.45	0	4	38.59	0.238	0	101.3	134	3.7807	0	2.605	0	5.4	0	4423	12370	0	14.03	1	13.51	38.59	0	1.83	1	3	0	-9.19463	5	3.00074
Ru	-3.584	-0.596	4.20843	-9.27635	3	2.13	8.17	447	1.78	120	0.82	28.47	13.5679	173	8000	194	24.06	2607	220	1.145	0.45	0	4	38.59	0.238	0	101.3	134	3.7807	0	2.605	0	5.4	0	4423	12370	0	14.03	1	13.51	38.59	0	1.83	1	3	0	-9.19463	5	3.00074
Ru	-3.584	-0.596	4.20843	-9.27635	4	2.13	8.17	447	1.78	120	0.76	45	13.5679	173	8000	194	24.06	2607	220	1.145	0.45	0	4	38.59	0.238	0	101.3	134	3.7807	0	2.605	0	5.4	0	4423	12370	0	14.03	1	13.51	38.59	0	1.83	1	3	0	-9.19463	5	3.00074
Ru	-3.584	-0.596	4.20843	-9.27635	3	2.13	8.17	447	1.78	120	0.82	28.47	13.5679	173	8000	194	24.06	2607	220	1.145	0.45	0	4	38.59	0.238	0	101.3	134	3.7807	0	2.605	0	5.4	0	4423	12370	0	14.03	1	13.51	38.59	0	1.83	1	3	0	-9.19463	5	3.00074
Ru	-3.584	-0.596	4.20843	-9.27635	4	2.13	8.17	447	1.78	120	0.76	45	13.5679	173	8000	194	24.06	2607	220	1.145	0.45	0	4	38.59	0.238	0	101.3	134	3.7807	0	2.605	0	5.4	0	4423	12370	0	14.03	1	13.51	38.59	0	1.83	1	3	0	-9.19463	5	3.00074
Ru	-3.584	-0.596	4.20843	-9.27635	4	2.13	8.17	447	1.78	120	0.76	45	13.5679	173	8000	194	24.06	2607	220	1.145	0.45	0	4	38.59	0.238	0	101.3	134	3.7807	0	2.605	0	5.4	0	4423	12370	0	14.03	1	13.51	38.59	0	1.83	1	3	0	-9.19463	5	3.00074
Ru	-3.584	-0.596	4.20843	-9.27635	3	2.13	8.17	447	1.78	120	0.82	28.47	13.5679	173	8000	194	24.06	2607	220	1.145	0.45	0	4	38.59	0.238	0	101.3	134	3.7807	0	2.605	0	5.4	0	4423	12370	0	14.03	1	13.51	38.59	0	1.83	1	3	0	-9.19463	5	3.00074
Ru	-3.584	-0.596	4.20843	-9.27635	3	2.13	8.17	447	1.78	120	0.82	28.47	13.5679	173	8000	194	24.06	2607	220	1.145	0.45	0	4	38.59	0.238	0	101.3	134	3.7807	0	2.605	0	5.4	0	4423	12370	0	14.03	1	13.51	38.59	0	1.83	1	3	0	-9.19463	5	3.00074
Ru	-3.584	-0.596	4.20843	-9.27635	3	2.13	8.17	447	1.78	120	0.82	28.47	13.5679	173	8000	194	24.06	2607	220	1.145	0.45	0	4	38.59	0.238	0	101.3	134	3.7807	0	2.605	0	5.4	0	4423	12370	0	14.03	1	13.51	38.59	0	1.83	1	3	0	-9.19463	5	3.00074
Ru	-3.584	-0.596	4.20843	-9.27635	4	2.13	8.17	447	1.78	120	0.76	45	13.5679	173	8000	194	24.06	2607	220	1.145	0.45	0	4	38.59	0.238	0	101.3	134	3.7807	0	2.605	0	5.4	0	4423	12370	0	14.03	1	13.51	38.59	0	1.83	1	3	0	-9.19463	5	3.00074
Ru	-3.584	-0.596	4.20843	-9.27635	4	2.13	8.17	447	1.78	120	0.76	45	13.5679	173	8000	194	24.06	2607	220	1.145	0.45	0	4	38.59	0.238	0	101.3	134	3.7807	0	2.605	0	5.4	0	4423	12370	0	14.03	1	13.51	38.59	0	1.83	1	3	0	-9.19463	5	3.00074
Ru	-3.584	-0.596	4.20843	-9.27635	4	2.13	8.17	447	1.78	120	0.76	45	13.5679	173	8000	194	24.06	2607	220	1.145	0.45	0	4	38.59	0.238	0	101.3	134	3.7807	0	2.605	0	5.4	0	4423	12370	0	14.03	1	13.51	38.59	0	1.83	1	3	0	-9.19463	5	3.00074
Ru	-3.584	-0.596	4.20843	-9.27635	3	2.13	8.17	447	1.78	120	0.82	28.47	13.5679	173	8000	194	24.06	2607	220	1.145	0.45	0	4	38.59	0.238	0	101.3	134	3.7807	0	2.605	0	5.4	0	4423	12370	0	14.03	1	13.51	38.59	0	1.83	1	3	0	-9.19463	5	3.00074
Ru	-3.584	-0.596	4.20843	-9.27635	4	2.13	8.17	447	1.78	120	0.76	45	13.5679	173	8000	194	24.06	2607	220	1.145	0.45	0	4	38.59	0.238	0	101.3	134	3.7807	0	2.605	0	5.4	0	4423	12370	0	14.03	1	13.51	38.59	0	1.83	1	3	0	-9.19463	5	3.00074
Ru	-3.584	-0.596	4.20843	-9.27635	4	2.13	8.17	447	1.78	120	0.76	45	13.5679	173	8000	194	24.06	2607	220	1.145	0.45	0	4	38.59	0.238	0	101.3	134	3.7807	0	2.605	0	5.4	0	4423	12370	0	14.03	1	13.51	38.59	0	1.83	1	3	0	-9.19463	5	3.00074
Ru	-3.584	-0.596	4.20843	-9.27635	4	2.13	8.17	447	1.78	120	0.76	45	13.5679	173	8000	194	24.06	2607	220	1.145	0.45	0	4	38.59	0.238	0	101.3	134	3.7807	0	2.605	0	5.4	0	4423	12370	0	14.03	1	13.51	38.59	0	1.83	1	3	0	-9.19463	5	3.00074
Ru	-3.584	-0.596	4.20843	-9.27635	3	2.13	8.17	447	1.78	120	0.82	28.47	13.5679	173	8000	194	24.06	2607	220	1.145	0.45	0	4	38.59	0.238	0	101.3	134	3.7807	0	2.605	0	5.4	0	4423	12370	0	14.03	1	13.51	38.59	0	1.83	1	3	0	-9.19463	5	3.00074
Ru	-3.584	-0.596	4.20843	-9.27635	3	2.13	8.17	447	1.78	120	0.82	28.47	13.5679	173	8000	194	24.06	2607	220	1.145	0.45	0	4	38.59	0.238	0	101.3	134	3.7807	0	2.605	0	5.4	0	4423	12370	0	14.03	1	13.51	38.59	0	1.83	1	3	0	-9.19463	5	3.00074
Ru	-3.584	-0.596	4.20843	-9.27635	3	2.13	8.17	447	1.78	120	0.82	28.47	13.5679	173	8000	194	24.06	2607	220	1.145	0.45	0	4	38.59	0.238	0	101.3	134	3.7807	0	2.605	0	5.4	0	4423	12370	0	14.03	1	13.51	38.59	0	1.83	1	3	0	-9.19463	5	3.00074
Ru	-3.584	-0.596	4.20843	-9.27635	4	2.13	8.17	447	1.78	120	0.76	45	13.5679	173	8000	194	24.06	2607	220	1.145	0.45	0	4	38.59	0.238	0	101.3	134	3.7807	0	2.605	0	5.4	0	4423	12370	0	14.03	1	13.51	38.59	0	1.83	1	3	0	-9.19463	5	3.00074
Ru	-3.584	-0.596	4.20843	-9.27635	3	2.13	8.17	447	1.78	120	0.82	28.47	13.5679	173	8000	194	24.06	2607	220	1.145	0.45	0	4	38.59	0.238	0	101.3	134	3.7807	0	2.605	0	5.4	0	4423	12370	0	14.03	1	13.51	38.59	0	1.83	1	3	0	-9.19463	5	3.00074
Ru	-3.584	-0.596	4.20843	-9.27635	3	2.13	8.17	447	1.78	120	0.82	28.47	13.5679	173	8000	194	24.06	2607	220	1.145	0.45	0	4	38.59	0.238	0	101.3	134	3.7807	0	2.605	0	5.4	0	4423	12370	0	14.03	1	13.51	38.59	0	1.83	1	3	0	-9.19463	5	3.00074
Ru	-3.584	-0.596	4.20843	-9.27635	4	2.13	8.17	447	1.78	120	0.76	45	13.5679	173	8000	194	24.06	2607	220	1.145	0.45	0	4	38.59	0.238	0	101.3	134	3.7807	0	2.605	0	5.4	0	4423	12370	0	14.03	1	13.51	38.59	0	1.83	1	3	0	-9.19463	5	3.00074
Os	-6.041	-1.216	4.89921	-11.2198	4	2.16	8.42	78	1.85	88	0.77	41	13.9837	222	9100	194	24.7	3306	129.03490683229813	1.17	0.543	0	4	57.85	0.13	0	106.1	135	3.83404	0	2.65	0	5.4	0	5285	22590	0	13.8	1	14.09	57.85	0	1.85	2	4	14	-11.2207	6	3.04308
Os	-6.041	-1.216	4.89921	-11.2198	4	2.16	8.42	78	1.85	88	0.77	41	13.9837	222	9100	194	24.7	3306	129.03490683229813	1.17	0.543	0	4	57.85	0.13	0	106.1	135	3.83404	0	2.65	0	5.4	0	5285	22590	0	13.8	1	14.09	57.85	0	1.85	2	4	14	-11.2207	6	3.04308
Os	-6.041	-1.216	4.89921	-11.2198	4	2.16	8.42	78	1.85	88	0.77	41	13.9837	222	9100	194	24.7	3306	129.03490683229813	1.17	0.543	0	4	57.85	0.13	0	106.1	135	3.83404	0	2.65	0	5.4	0	5285	22590	0	13.8	1	14.09	57.85	0	1.85	2	4	14	-11.2207	6	3.04308
Os	-6.041	-1.216	4.89921	-11.2198	4	2.16	8.42	78	1.85	88	0.77	41	13.9837	222	9100	194	24.7	3306	129.03490683229813	1.17	0.543	0	4	57.85	0.13	0	106.1	135	3.83404	0	2.65	0	5.4	0	5285	22590	0	13.8	1	14.09	57.85	0	1.85	2	4	14	-11.2207	6	3.04308
Os	-6.041	-1.216	4.89921	-11.2198	4	2.16	8.42	78	1.85	88	0.77	41	13.9837	222	9100	194	24.7	3306	129.03490683229813	1.17	0.543	0	4	57.85	0.13	0	106.1	135	3.83404	0	2.65	0	5.4	0	5285	22590	0	13.8	1	14.09	57.85	0	1.85	2	4	14	-11.2207	6	3.04308
Os	-6.041	-1.216	4.89921	-11.2198	4	2.16	8.42	78	1.85	88	0.77	41	13.9837	222	9100	194	24.7	3306	129.03490683229813	1.17	0.543	0	4	57.85	0.13	0	106.1	135	3.83404	0	2.65	0	5.4	0	5285	22590	0	13.8	1	14.09	57.85	0	1.85	2	4	14	-11.2207	6	3.04308
Os	-6.041	-1.216	4.89921	-11.2198	4	2.16	8.42	78	1.85	88	0.77	41	13.9837	222	9100	194	24.7	3306	129.03490683229813	1.17	0.543	0	4	57.85	0.13	0	106.1	135	3.83404	0	2.65	0	5.4	0	5285	22590	0	13.8	1	14.09	57.85	0	1.85	2	4	14	-11.2207	6	3.04308
Os	-6.041	-1.216	4.89921	-11.2198	4	2.16	8.42	78	1.85	88	0.77	41	13.9837	222	9100	194	24.7	3306	129.03490683229813	1.17	0.543	0	4	57.85	0.13	0	106.1	135	3.83404	0	2.65	0	5.4	0	5285	22590	0	13.8	1	14.09	57.85	0	1.85	2	4	14	-11.2207	6	3.04308
Os	-6.041	-1.216	4.89921	-11.2198	4	2.16	8.42	78	1.85	88	0.77	41	13.9837	222	9100	194	24.7	3306	129.03490683229813	1.17	0.543	0	4	57.85	0.13	0	106.1	135	3.83404	0	2.65	0	5.4	0	5285	22590	0	13.8	1	14.09	57.85	0	1.85	2	4	14	-11.2207	6	3.04308
Os	-6.041	-1.216	4.89921	-11.2198	4	2.16	8.42	78	1.85	88	0.77	41	13.9837	222	9100	194	24.7	3306	129.03490683229813	1.17	0.543	0	4	57.85	0.13	0	106.1	135	3.83404	0	2.65	0	5.4	0	5285	22590	0	13.8	1	14.09	57.85	0	1.85	2	4	14	-11.2207	6	3.04308
Os	-6.041	-1.216	4.89921	-11.2198	4	2.16	8.42	78	1.85	88	0.77	41	13.9837	222	9100	194	24.7	3306	129.03490683229813	1.17	0.543	0	4	57.85	0.13	0	106.1	135	3.83404	0	2.65	0	5.4	0	5285	22590	0	13.8	1	14.09	57.85	0	1.85	2	4	14	-11.2207	6	3.04308
Os	-6.041	-1.216	4.89921	-11.2198	4	2.16	8.42	78	1.85	88	0.77	41	13.9837	222	9100	194	24.7	3306	129.03490683229813	1.17	0.543	0	4	57.85	0.13	0	106.1	135	3.83404	0	2.65	0	5.4	0	5285	22590	0	13.8	1	14.09	57.85	0	1.85	2	4	14	-11.2207	6	3.04308
Os	-6.041	-1.216	4.89921	-11.2198	4	2.16	8.42	78	1.85	88	0.77	41	13.9837	222	9100	194	24.7	3306	129.03490683229813	1.17	0.543	0	4	57.85	0.13	0	106.1	135	3.83404	0	2.65	0	5.4	0	5285	22590	0	13.8	1	14.09	57.85	0	1.85	2	4	14	-11.2207	6	3.04308
Os	-6.041	-1.216	4.89921	-11.2198	4	2.16	8.42	78	1.85	88	0.77	41	13.9837	222	9100	194	24.7	3306	129.03490683229813	1.17	0.543	0	4	57.85	0.13	0	106.1	135	3.83404	0	2.65	0	5.4	0	5285	22590	0	13.8	1	14.09	57.85	0	1.85	2	4	14	-11.2207	6	3.04308
Os	-6.041	-1.216	4.89921	-11.2198	4	2.16	8.42	78	1.85	88	0.77	41	13.9837	222	9100	194	24.7	3306	129.03490683229813	1.17	0.543	0	4	57.85	0.13	0	106.1	135	3.83404	0	2.65	0	5.4	0	5285	22590	0	13.8	1	14.09	57.85	0	1.85	2	4	14	-11.2207	6	3.04308
Os	-6.041	-1.216	4.89921	-11.2198	4	2.16	8.42	78	1.85	88	0.77	41	13.9837	222	9100	194	24.7	3306	129.03490683229813	1.17	0.543	0	4	57.85	0.13	0	106.1	135	3.83404	0	2.65	0	5.4	0	5285	22590	0	13.8	1	14.09	57.85	0	1.85	2	4	14	-11.2207	6	3.04308
Os	-6.041	-1.216	4.89921	-11.2198	4	2.16	8.42	78	1.85	88	0.77	41	13.9837	222	9100	194	24.7	3306	129.03490683229813	1.17	0.543	0	4	57.85	0.13	0	106.1	135	3.83404	0	2.65	0	5.4	0	5285	22590	0	13.8	1	14.09	57.85	0	1.85	2	4	14	-11.2207	6	3.04308
Co	-4.436	-0.84	4.26077	-7.10999	3	2	6.67	209	1.52	100	0.75	33.5	10.9959	75	2700	194	24.81	1768	180	0.92	0.21	0	3	16.2	0.421	0	63.7	125	3.44766	0	2.02	0	5.1	0	3200	8900	0	11.12	1	10.245	16.2	1.54847	1.75	2	3	0	-7.08039	4	2.73641
Co	-4.436	-0.84	4.26077	-7.10999	3	2	6.67	209	1.52	100	0.75	33.5	10.9959	75	2700	194	24.81	1768	180	0.92	0.21	0	3	16.2	0.421	0	63.7	125	3.44766	0	2.02	0	5.1	0	3200	8900	0	11.12	1	10.245	16.2	1.54847	1.75	2	3	0	-7.08039	4	2.73641
Co	-4.436	-0.84	4.26077	-7.10999	3	2	6.67	209	1.52	100	0.75	33.5	10.9959	75	2700	194	24.81	1768	180	0.92	0.21	0	3	16.2	0.421	0	63.7	125	3.44766	0	2.02	0	5.1	0	3200	8900	0	11.12	1	10.245	16.2	1.54847	1.75	2	3	0	-7.08039	4	2.73641
Co	-4.436	-0.84	4.26077	-7.10999	3	2	6.67	209	1.52	100	0.75	33.5	10.9959	75	2700	194	24.81	1768	180	0.92	0.21	0	3	16.2	0.421	0	63.7	125	3.44766	0	2.02	0	5.1	0	3200	8900	0	11.12	1	10.245	16.2	1.54847	1.75	2	3	0	-7.08039	4	2.73641
Co	-4.436	-0.84	4.26077	-7.10999	3	2	6.67	209	1.52	100	0.75	33.5	10.9959	75	2700	194	24.81	1768	180	0.92	0.21	0	3	16.2	0.421	0	63.7	125	3.44766	0	2.02	0	5.1	0	3200	8900	0	11.12	1	10.245	16.2	1.54847	1.75	2	3	0	-7.08039	4	2.73641
Co	-4.436	-0.84	4.26077	-7.10999	3	2	6.67	209	1.52	100	0.75	33.5	10.9959	75	2700	194	24.81	1768	180	0.92	0.21	0	3	16.2	0.421	0	63.7	125	3.44766	0	2.02	0	5.1	0	3200	8900	0	11.12	1	10.245	16.2	1.54847	1.75	2	3	0	-7.08039	4	2.73641
Co	-4.436	-0.84	4.26077	-7.10999	3	2	6.67	209	1.52	100	0.75	33.5	10.9959	75	2700	194	24.81	1768	180	0.92	0.21	0	3	16.2	0.421	0	63.7	125	3.44766	0	2.02	0	5.1	0	3200	8900	0	11.12	1	10.245	16.2	1.54847	1.75	2	3	0	-7.08039	4	2.73641
Co	-4.436	-0.84	4.26077	-7.10999	2	2	6.67	209	1.52	100	0.885	17.0844	10.9959	75	2700	194	24.81	1768	180	0.92	0.21	0	3	16.2	0.421	0	63.7	125	3.44766	0	2.02	0	5.1	0	3200	8900	0	11.12	1	10.245	16.2	1.54847	1.75	2	3	0	-7.08039	4	2.73641
Co	-4.436	-0.84	4.26077	-7.10999	2	2	6.67	209	1.52	100	0.885	17.0844	10.9959	75	2700	194	24.81	1768	180	0.92	0.21	0	3	16.2	0.421	0	63.7	125	3.44766	0	2.02	0	5.1	0	3200	8900	0	11.12	1	10.245	16.2	1.54847	1.75	2	3	0	-7.08039	4	2.73641
Co	-4.436	-0.84	4.26077	-7.10999	3	2	6.67	209	1.52	100	0.75	33.5	10.9959	75	2700	194	24.81	1768	180	0.92	0.21	0	3	16.2	0.421	0	63.7	125	3.44766	0	2.02	0	5.1	0	3200	8900	0	11.12	1	10.245	16.2	1.54847	1.75	2	3	0	-7.08039	4	2.73641
Co	-4.436	-0.84	4.26077	-7.10999	3	2	6.67	209	1.52	100	0.75	33.5	10.9959	75	2700	194	24.81	1768	180	0.92	0.21	0	3	16.2	0.421	0	63.7	125	3.44766	0	2.02	0	5.1	0	3200	8900	0	11.12	1	10.245	16.2	1.54847	1.75	2	3	0	-7.08039	4	2.73641
Co	-4.436	-0.84	4.26077	-7.10999	2	2	6.67	209	1.52	100	0.885	17.0844	10.9959	75	2700	194	24.81	1768	180	0.92	0.21	0	3	16.2	0.421	0	63.7	125	3.44766	0	2.02	0	5.1	0	3200	8900	0	11.12	1	10.245	16.2	1.54847	1.75	2	3	0	-7.08039	4	2.73641
Co	-4.436	-0.84	4.26077	-7.10999	2	2	6.67	209	1.52	100	0.885	17.0844	10.9959	75	2700	194	24.81	1768	180	0.92	0.21	0	3	16.2	0.421	0	63.7	125	3.44766	0	2.02	0	5.1	0	3200	8900	0	11.12	1	10.245	16.2	1.54847	1.75	2	3	0	-7.08039	4	2.73641
Co	-4.436	-0.84	4.26077	-7.10999	2	2	6.67	209	1.52	100	0.885	17.0844	10.9959	75	2700	194	24.81	1768	180	0.92	0.21	0	3	16.2	0.421	0	63.7	125	3.44766	0	2.02	0	5.1	0	3200	8900	0	11.12	1	10.245	16.2	1.54847	1.75	2	3	0	-7.08039	4	2.73641
Co	-4.436	-0.84	4.26077	-7.10999	3	2	6.67	209	1.52	100	0.75	33.5	10.9959	75	2700	194	24.81	1768	180	0.92	0.21	0	3	16.2	0.421	0	63.7	125	3.44766	0	2.02	0	5.1	0	3200	8900	0	11.12	1	10.245	16.2	1.54847	1.75	2	3	0	-7.08039	4	2.73641
Co	-4.436	-0.84	4.26077	-7.10999	2	2	6.67	209	1.52	100	0.885	17.0844	10.9959	75	2700	194	24.81	1768	180	0.92	0.21	0	3	16.2	0.421	0	63.7	125	3.44766	0	2.02	0	5.1	0	3200	8900	0	11.12	1	10.245	16.2	1.54847	1.75	2	3	0	-7.08039	4	2.73641
Co	-4.436	-0.84	4.26077	-7.10999	2	2	6.67	209	1.52	100	0.885	17.0844	10.9959	75	2700	194	24.81	1768	180	0.92	0.21	0	3	16.2	0.421	0	63.7	125	3.44766	0	2.02	0	5.1	0	3200	8900	0	11.12	1	10.245	16.2	1.54847	1.75	2	3	0	-7.08039	4	2.73641
Co	-4.436	-0.84	4.26077	-7.10999	2	2	6.67	209	1.52	100	0.885	17.0844	10.9959	75	2700	194	24.81	1768	180	0.92	0.21	0	3	16.2	0.421	0	63.7	125	3.44766	0	2.02	0	5.1	0	3200	8900	0	11.12	1	10.245	16.2	1.54847	1.75	2	3	0	-7.08039	4	2.73641
Co	-4.436	-0.84	4.26077	-7.10999	2	2	6.67	209	1.52	100	0.885	17.0844	10.9959	75	2700	194	24.81	1768	180	0.92	0.21	0	3	16.2	0.421	0	63.7	125	3.44766	0	2.02	0	5.1	0	3200	8900	0	11.12	1	10.245	16.2	1.54847	1.75	2	3	0	-7.08039	4	2.73641
Co	-4.436	-0.84	4.26077	-7.10999	3	2	6.67	209	1.52	100	0.75	33.5	10.9959	75	2700	194	24.81	1768	180	0.92	0.21	0	3	16.2	0.421	0	63.7	125	3.44766	0	2.02	0	5.1	0	3200	8900	0	11.12	1	10.245	16.2	1.54847	1.75	2	3	0	-7.08039	4	2.73641
Co	-4.436	-0.84	4.26077	-7.10999	3	2	6.67	209	1.52	100	0.75	33.5	10.9959	75	2700	194	24.81	1768	180	0.92	0.21	0	3	16.2	0.421	0	63.7	125	3.44766	0	2.02	0	5.1	0	3200	8900	0	11.12	1	10.245	16.2	1.54847	1.75	2	3	0	-7.08039	4	2.73641
Co	-4.436	-0.84	4.26077	-7.10999	3	2	6.67	209	1.52	100	0.75	33.5	10.9959	75	2700	194	24.81	1768	180	0.92	0.21	0	3	16.2	0.421	0	63.7	125	3.44766	0	2.02	0	5.1	0	3200	8900	0	11.12	1	10.245	16.2	1.54847	1.75	2	3	0	-7.08039	4	2.73641
Co	-4.436	-0.84	4.26077	-7.10999	2	2	6.67	209	1.52	100	0.885	17.0844	10.9959	75	2700	194	24.81	1768	180	0.92	0.21	0	3	16.2	0.421	0	63.7	125	3.44766	0	2.02	0	5.1	0	3200	8900	0	11.12	1	10.245	16.2	1.54847	1.75	2	3	0	-7.08039	4	2.73641
Co	-4.436	-0.84	4.26077	-7.10999	2	2	6.67	209	1.52	100	0.885	17.0844	10.9959	75	2700	194	24.81	1768	180	0.92	0.21	0	3	16.2	0.421	0	63.7	125	3.44766	0	2.02	0	5.1	0	3200	8900	0	11.12	1	10.245	16.2	1.54847	1.75	2	3	0	-7.08039	4	2.73641
Co	-4.436	-0.84	4.26077	-7.10999	2	2	6.67	209	1.52	100	0.885	17.0844	10.9959	75	2700	194	24.81	1768	180	0.92	0.21	0	3	16.2	0.421	0	63.7	125	3.44766	0	2.02	0	5.1	0	3200	8900	0	11.12	1	10.245	16.2	1.54847	1.75	2	3	0	-7.08039	4	2.73641
Co	-4.436	-0.84	4.26077	-7.10999	2	2	6.67	209	1.52	100	0.885	17.0844	10.9959	75	2700	194	24.81	1768	180	0.92	0.21	0	3	16.2	0.421	0	63.7	125	3.44766	0	2.02	0	5.1	0	3200	8900	0	11.12	1	10.245	16.2	1.54847	1.75	2	3	0	-7.08039	4	2.73641
Co	-4.436	-0.84	4.26077	-7.10999	3	2	6.67	209	1.52	100	0.75	33.5	10.9959	75	2700	194	24.81	1768	180	0.92	0.21	0	3	16.2	0.421	0	63.7	125	3.44766	0	2.02	0	5.1	0	3200	8900	0	11.12	1	10.245	16.2	1.54847	1.75	2	3	0	-7.08039	4	2.73641
Co	-4.436	-0.84	4.26077	-7.10999	2	2	6.67	209	1.52	100	0.885	17.0844	10.9959	75	2700	194	24.81	1768	180	0.92	0.21	0	3	16.2	0.421	0	63.7	125	3.44766	0	2.02	0	5.1	0	3200	8900	0	11.12	1	10.245	16.2	1.54847	1.75	2	3	0	-7.08039	4	2.73641
Co	-4.436	-0.84	4.26077	-7.10999	3	2	6.67	209	1.52	100	0.75	33.5	10.9959	75	2700	194	24.81	1768	180	0.92	0.21	0	3	16.2	0.421	0	63.7	125	3.44766	0	2.02	0	5.1	0	3200	8900	0	11.12	1	10.245	16.2	1.54847	1.75	2	3	0	-7.08039	4	2.73641
Co	-4.436	-0.84	4.26077	-7.10999	2	2	6.67	209	1.52	100	0.885	17.0844	10.9959	75	2700	194	24.81	1768	180	0.92	0.21	0	3	16.2	0.421	0	63.7	125	3.44766	0	2.02	0	5.1	0	3200	8900	0	11.12	1	10.245	16.2	1.54847	1.75	2	3	0	-7.08039	4	2.73641
Rh	-3.589	-3.365	4.2986	-7.357	3	2.1	8.28	275	1.73	150	0.805	31.06	13.7255	150	8000	225	24.98	2237	380	1.11	0.42	0	3	26.59	0.243	0	109.7	132	3.79278	0	2.52	0	5.4	0	3968	12450	0	11.58	1	13.64	26.59	0	1.76	1	2	0	-7.25365	5	3.01033
Rh	-3.589	-3.365	4.2986	-7.357	3	2.1	8.28	275	1.73	150	0.805	31.06	13.7255	150	8000	225	24.98	2237	380	1.11	0.42	0	3	26.59	0.243	0	109.7	132	3.79278	0	2.52	0	5.4	0	3968	12450	0	11.58	1	13.64	26.59	0	1.76	1	2	0	-7.25365	5	3.01033
Rh	-3.589	-3.365	4.2986	-7.357	3	2.1	8.28	275	1.73	150	0.805	31.06	13.7255	150	8000	225	24.98	2237	380	1.11	0.42	0	3	26.59	0.243	0	109.7	132	3.79278	0	2.52	0	5.4	0	3968	12450	0	11.58	1	13.64	26.59	0	1.76	1	2	0	-7.25365	5	3.01033
Rh	-3.589	-3.365	4.2986	-7.357	3	2.1	8.28	275	1.73	150	0.805	31.06	13.7255	150	8000	225	24.98	2237	380	1.11	0.42	0	3	26.59	0.243	0	109.7	132	3.79278	0	2.52	0	5.4	0	3968	12450	0	11.58	1	13.64	26.59	0	1.76	1	2	0	-7.25365	5	3.01033
Rh	-3.589	-3.365	4.2986	-7.357	3	2.1	8.28	275	1.73	150	0.805	31.06	13.7255	150	8000	225	24.98	2237	380	1.11	0.42	0	3	26.59	0.243	0	109.7	132	3.79278	0	2.52	0	5.4	0	3968	12450	0	11.58	1	13.64	26.59	0	1.76	1	2	0	-7.25365	5	3.01033
Rh	-3.589	-3.365	4.2986	-7.357	3	2.1	8.28	275	1.73	150	0.805	31.06	13.7255	150	8000	225	24.98	2237	380	1.11	0.42	0	3	26.59	0.243	0	109.7	132	3.79278	0	2.52	0	5.4	0	3968	12450	0	11.58	1	13.64	26.59	0	1.76	1	2	0	-7.25365	5	3.01033
Rh	-3.589	-3.365	4.2986	-7.357	3	2.1	8.28	275	1.73	150	0.805	31.06	13.7255	150	8000	225	24.98	2237	380	1.11	0.42	0	3	26.59	0.243	0	109.7	132	3.79278	0	2.52	0	5.4	0	3968	12450	0	11.58	1	13.64	26.59	0	1.76	1	2	0	-7.25365	5	3.01033
Rh	-3.589	-3.365	4.2986	-7.357	3	2.1	8.28	275	1.73	150	0.805	31.06	13.7255	150	8000	225	24.98	2237	380	1.11	0.42	0	3	26.59	0.243	0	109.7	132	3.79278	0	2.52	0	5.4	0	3968	12450	0	11.58	1	13.64	26.59	0	1.76	1	2	0	-7.25365	5	3.01033
Rh	-3.589	-3.365	4.2986	-7.357	3	2.1	8.28	275	1.73	150	0.805	31.06	13.7255	150	8000	225	24.98	2237	380	1.11	0.42	0	3	26.59	0.243	0	109.7	132	3.79278	0	2.52	0	5.4	0	3968	12450	0	11.58	1	13.64	26.59	0	1.76	1	2	0	-7.25365	5	3.01033
Rh	-3.589	-3.365	4.2986	-7.357	3	2.1	8.28	275	1.73	150	0.805	31.06	13.7255	150	8000	225	24.98	2237	380	1.11	0.42	0	3	26.59	0.243	0	109.7	132	3.79278	0	2.52	0	5.4	0	3968	12450	0	11.58	1	13.64	26.59	0	1.76	1	2	0	-7.25365	5	3.01033
Rh	-3.589	-3.365	4.2986	-7.357	3	2.1	8.28	275	1.73	150	0.805	31.06	13.7255	150	8000	225	24.98	2237	380	1.11	0.42	0	3	26.59	0.243	0	109.7	132	3.79278	0	2.52	0	5.4	0	3968	12450	0	11.58	1	13.64	26.59	0	1.76	1	2	0	-7.25365	5	3.01033
Rh	-3.589	-3.365	4.2986	-7.357	3	2.1	8.28	275	1.73	150	0.805	31.06	13.7255	150	8000	225	24.98	2237	380	1.11	0.42	0	3	26.59	0.243	0	109.7	132	3.79278	0	2.52	0	5.4	0	3968	12450	0	11.58	1	13.64	26.59	0	1.76	1	2	0	-7.25365	5	3.01033
Rh	-3.589	-3.365	4.2986	-7.357	3	2.1	8.28	275	1.73	150	0.805	31.06	13.7255	150	8000	225	24.98	2237	380	1.11	0.42	0	3	26.59	0.243	0	109.7	132	3.79278	0	2.52	0	5.4	0	3968	12450	0	11.58	1	13.64	26.59	0	1.76	1	2	0	-7.25365	5	3.01033
Rh	-3.589	-3.365	4.2986	-7.357	3	2.1	8.28	275	1.73	150	0.805	31.06	13.7255	150	8000	225	24.98	2237	380	1.11	0.42	0	3	26.59	0.243	0	109.7	132	3.79278	0	2.52	0	5.4	0	3968	12450	0	11.58	1	13.64	26.59	0	1.76	1	2	0	-7.25365	5	3.01033
Rh	-3.589	-3.365	4.2986	-7.357	3	2.1	8.28	275	1.73	150	0.805	31.06	13.7255	150	8000	225	24.98	2237	380	1.11	0.42	0	3	26.59	0.243	0	109.7	132	3.79278	0	2.52	0	5.4	0	3968	12450	0	11.58	1	13.64	26.59	0	1.76	1	2	0	-7.25365	5	3.01033
Rh	-3.589	-3.365	4.2986	-7.357	3	2.1	8.28	275	1.73	150	0.805	31.06	13.7255	150	8000	225	24.98	2237	380	1.11	0.42	0	3	26.59	0.243	0	109.7	132	3.79278	0	2.52	0	5.4	0	3968	12450	0	11.58	1	13.64	26.59	0	1.76	1	2	0	-7.25365	5	3.01033
Rh	-3.589	-3.365	4.2986	-7.357	3	2.1	8.28	275	1.73	150	0.805	31.06	13.7255	150	8000	225	24.98	2237	380	1.11	0.42	0	3	26.59	0.243	0	109.7	132	3.79278	0	2.52	0	5.4	0	3968	12450	0	11.58	1	13.64	26.59	0	1.76	1	2	0	-7.25365	5	3.01033
Rh	-3.589	-3.365	4.2986	-7.357	3	2.1	8.28	275	1.73	150	0.805	31.06	13.7255	150	8000	225	24.98	2237	380	1.11	0.42	0	3	26.59	0.243	0	109.7	132	3.79278	0	2.52	0	5.4	0	3968	12450	0	11.58	1	13.64	26.59	0	1.76	1	2	0	-7.25365	5	3.01033
Ir	-5.659	-0.955	5.33244	-8.86383	3	2.13	8.52	528	1.8	150	0.82	28	14.1486	210	9100	225	25.1	2739	320	1.16	0.526	0	3	41.12	0.131	0	151	136	3.8449	0	2.628	0	5.55	0	4701	22560	0	13.88	1	14.21	41.12	0	1.83	2	3	14	-8.84851	6	3.0517
Ir	-5.659	-0.955	5.33244	-8.86383	3	2.13	8.52	528	1.8	150	0.82	28	14.1486	210	9100	225	25.1	2739	320	1.16	0.526	0	3	41.12	0.131	0	151	136	3.8449	0	2.628	0	5.55	0	4701	22560	0	13.88	1	14.21	41.12	0	1.83	2	3	14	-8.84851	6	3.0517
Ir	-5.659	-0.955	5.33244	-8.86383	3	2.13	8.52	528	1.8	150	0.82	28	14.1486	210	9100	225	25.1	2739	320	1.16	0.526	0	3	41.12	0.131	0	151	136	3.8449	0	2.628	0	5.55	0	4701	22560	0	13.88	1	14.21	41.12	0	1.83	2	3	14	-8.84851	6	3.0517
Ir	-5.659	-0.955	5.33244	-8.86383	3	2.13	8.52	528	1.8	150	0.82	28	14.1486	210	9100	225	25.1	2739	320	1.16	0.526	0	3	41.12	0.131	0	151	136	3.8449	0	2.628	0	5.55	0	4701	22560	0	13.88	1	14.21	41.12	0	1.83	2	3	14	-8.84851	6	3.0517
Ir	-5.659	-0.955	5.33244	-8.86383	4	2.13	8.52	528	1.8	150	0.765	40	14.1486	210	9100	225	25.1	2739	320	1.16	0.526	0	3	41.12	0.131	0	151	136	3.8449	0	2.628	0	5.55	0	4701	22560	0	13.88	1	14.21	41.12	0	1.83	2	3	14	-8.84851	6	3.0517
Ir	-5.659	-0.955	5.33244	-8.86383	4	2.13	8.52	528	1.8	150	0.765	40	14.1486	210	9100	225	25.1	2739	320	1.16	0.526	0	3	41.12	0.131	0	151	136	3.8449	0	2.628	0	5.55	0	4701	22560	0	13.88	1	14.21	41.12	0	1.83	2	3	14	-8.84851	6	3.0517
Ir	-5.659	-0.955	5.33244	-8.86383	3	2.13	8.52	528	1.8	150	0.82	28	14.1486	210	9100	225	25.1	2739	320	1.16	0.526	0	3	41.12	0.131	0	151	136	3.8449	0	2.628	0	5.55	0	4701	22560	0	13.88	1	14.21	41.12	0	1.83	2	3	14	-8.84851	6	3.0517
Ir	-5.659	-0.955	5.33244	-8.86383	4	2.13	8.52	528	1.8	150	0.765	40	14.1486	210	9100	225	25.1	2739	320	1.16	0.526	0	3	41.12	0.131	0	151	136	3.8449	0	2.628	0	5.55	0	4701	22560	0	13.88	1	14.21	41.12	0	1.83	2	3	14	-8.84851	6	3.0517
Ir	-5.659	-0.955	5.33244	-8.86383	4	2.13	8.52	528	1.8	150	0.765	40	14.1486	210	9100	225	25.1	2739	320	1.16	0.526	0	3	41.12	0.131	0	151	136	3.8449	0	2.628	0	5.55	0	4701	22560	0	13.88	1	14.21	41.12	0	1.83	2	3	14	-8.84851	6	3.0517
Ir	-5.659	-0.955	5.33244	-8.86383	3	2.13	8.52	528	1.8	150	0.82	28	14.1486	210	9100	225	25.1	2739	320	1.16	0.526	0	3	41.12	0.131	0	151	136	3.8449	0	2.628	0	5.55	0	4701	22560	0	13.88	1	14.21	41.12	0	1.83	2	3	14	-8.84851	6	3.0517
Ir	-5.659	-0.955	5.33244	-8.86383	4	2.13	8.52	528	1.8	150	0.765	40	14.1486	210	9100	225	25.1	2739	320	1.16	0.526	0	3	41.12	0.131	0	151	136	3.8449	0	2.628	0	5.55	0	4701	22560	0	13.88	1	14.21	41.12	0	1.83	2	3	14	-8.84851	6	3.0517
Ir	-5.659	-0.955	5.33244	-8.86383	3	2.13	8.52	528	1.8	150	0.82	28	14.1486	210	9100	225	25.1	2739	320	1.16	0.526	0	3	41.12	0.131	0	151	136	3.8449	0	2.628	0	5.55	0	4701	22560	0	13.88	1	14.21	41.12	0	1.83	2	3	14	-8.84851	6	3.0517
Ir	-5.659	-0.955	5.33244	-8.86383	4	2.13	8.52	528	1.8	150	0.765	40	14.1486	210	9100	225	25.1	2739	320	1.16	0.526	0	3	41.12	0.131	0	151	136	3.8449	0	2.628	0	5.55	0	4701	22560	0	13.88	1	14.21	41.12	0	1.83	2	3	14	-8.84851	6	3.0517
Ir	-5.659	-0.955	5.33244	-8.86383	4	2.13	8.52	528	1.8	150	0.765	40	14.1486	210	9100	225	25.1	2739	320	1.16	0.526	0	3	41.12	0.131	0	151	136	3.8449	0	2.628	0	5.55	0	4701	22560	0	13.88	1	14.21	41.12	0	1.83	2	3	14	-8.84851	6	3.0517
Ir	-5.659	-0.955	5.33244	-8.86383	3	2.13	8.52	528	1.8	150	0.82	28	14.1486	210	9100	225	25.1	2739	320	1.16	0.526	0	3	41.12	0.131	0	151	136	3.8449	0	2.628	0	5.55	0	4701	22560	0	13.88	1	14.21	41.12	0	1.83	2	3	14	-8.84851	6	3.0517
Ir	-5.659	-0.955	5.33244	-8.86383	3	2.13	8.52	528	1.8	150	0.82	28	14.1486	210	9100	225	25.1	2739	320	1.16	0.526	0	3	41.12	0.131	0	151	136	3.8449	0	2.628	0	5.55	0	4701	22560	0	13.88	1	14.21	41.12	0	1.83	2	3	14	-8.84851	6	3.0517
Ir	-5.659	-0.955	5.33244	-8.86383	4	2.13	8.52	528	1.8	150	0.765	40	14.1486	210	9100	225	25.1	2739	320	1.16	0.526	0	3	41.12	0.131	0	151	136	3.8449	0	2.628	0	5.55	0	4701	22560	0	13.88	1	14.21	41.12	0	1.83	2	3	14	-8.84851	6	3.0517
Ir	-5.659	-0.955	5.33244	-8.86383	4	2.13	8.52	528	1.8	150	0.765	40	14.1486	210	9100	225	25.1	2739	320	1.16	0.526	0	3	41.12	0.131	0	151	136	3.8449	0	2.628	0	5.55	0	4701	22560	0	13.88	1	14.21	41.12	0	1.83	2	3	14	-8.84851	6	3.0517
Ir	-5.659	-0.955	5.33244	-8.86383	4	2.13	8.52	528	1.8	150	0.765	40	14.1486	210	9100	225	25.1	2739	320	1.16	0.526	0	3	41.12	0.131	0	151	136	3.8449	0	2.628	0	5.55	0	4701	22560	0	13.88	1	14.21	41.12	0	1.83	2	3	14	-8.84851	6	3.0517
Ir	-5.659	-0.955	5.33244	-8.86383	3	2.13	8.52	528	1.8	150	0.82	28	14.1486	210	9100	225	25.1	2739	320	1.16	0.526	0	3	41.12	0.131	0	151	136	3.8449	0	2.628	0	5.55	0	4701	22560	0	13.88	1	14.21	41.12	0	1.83	2	3	14	-8.84851	6	3.0517
Ir	-5.659	-0.955	5.33244	-8.86383	4	2.13	8.52	528	1.8	150	0.765	40	14.1486	210	9100	225	25.1	2739	320	1.16	0.526	0	3	41.12	0.131	0	151	136	3.8449	0	2.628	0	5.55	0	4701	22560	0	13.88	1	14.21	41.12	0	1.83	2	3	14	-8.84851	6	3.0517
Ir	-5.659	-0.955	5.33244	-8.86383	4	2.13	8.52	528	1.8	150	0.765	40	14.1486	210	9100	225	25.1	2739	320	1.16	0.526	0	3	41.12	0.131	0	151	136	3.8449	0	2.628	0	5.55	0	4701	22560	0	13.88	1	14.21	41.12	0	1.83	2	3	14	-8.84851	6	3.0517
Ir	-5.659	-0.955	5.33244	-8.86383	4	2.13	8.52	528	1.8	150	0.765	40	14.1486	210	9100	225	25.1	2739	320	1.16	0.526	0	3	41.12	0.131	0	151	136	3.8449	0	2.628	0	5.55	0	4701	22560	0	13.88	1	14.21	41.12	0	1.83	2	3	14	-8.84851	6	3.0517
Ir	-5.659	-0.955	5.33244	-8.86383	3	2.13	8.52	528	1.8	150	0.82	28	14.1486	210	9100	225	25.1	2739	320	1.16	0.526	0	3	41.12	0.131	0	151	136	3.8449	0	2.628	0	5.55	0	4701	22560	0	13.88	1	14.21	41.12	0	1.83	2	3	14	-8.84851	6	3.0517
Ir	-5.659	-0.955	5.33244	-8.86383	3	2.13	8.52	528	1.8	150	0.82	28	14.1486	210	9100	225	25.1	2739	320	1.16	0.526	0	3	41.12	0.131	0	151	136	3.8449	0	2.628	0	5.55	0	4701	22560	0	13.88	1	14.21	41.12	0	1.83	2	3	14	-8.84851	6	3.0517
Ir	-5.659	-0.955	5.33244	-8.86383	3	2.13	8.52	528	1.8	150	0.82	28	14.1486	210	9100	225	25.1	2739	320	1.16	0.526	0	3	41.12	0.131	0	151	136	3.8449	0	2.628	0	5.55	0	4701	22560	0	13.88	1	14.21	41.12	0	1.83	2	3	14	-8.84851	6	3.0517
Ir	-5.659	-0.955	5.33244	-8.86383	3	2.13	8.52	528	1.8	150	0.82	28	14.1486	210	9100	225	25.1	2739	320	1.16	0.526	0	3	41.12	0.131	0	151	136	3.8449	0	2.628	0	5.55	0	4701	22560	0	13.88	1	14.21	41.12	0	1.83	2	3	14	-8.84851	6	3.0517
Ir	-5.659	-0.955	5.33244	-8.86383	4	2.13	8.52	528	1.8	150	0.765	40	14.1486	210	9100	225	25.1	2739	320	1.16	0.526	0	3	41.12	0.131	0	151	136	3.8449	0	2.628	0	5.55	0	4701	22560	0	13.88	1	14.21	41.12	0	1.83	2	3	14	-8.84851	6	3.0517
Ir	-5.659	-0.955	5.33244	-8.86383	3	2.13	8.52	528	1.8	150	0.82	28	14.1486	210	9100	225	25.1	2739	320	1.16	0.526	0	3	41.12	0.131	0	151	136	3.8449	0	2.628	0	5.55	0	4701	22560	0	13.88	1	14.21	41.12	0	1.83	2	3	14	-8.84851	6	3.0517
Ir	-5.659	-0.955	5.33244	-8.86383	3	2.13	8.52	528	1.8	150	0.82	28	14.1486	210	9100	225	25.1	2739	320	1.16	0.526	0	3	41.12	0.131	0	151	136	3.8449	0	2.628	0	5.55	0	4701	22560	0	13.88	1	14.21	41.12	0	1.83	2	3	14	-8.84851	6	3.0517
Ir	-5.659	-0.955	5.33244	-8.86383	4	2.13	8.52	528	1.8	150	0.765	40	14.1486	210	9100	225	25.1	2739	320	1.16	0.526	0	3	41.12	0.131	0	151	136	3.8449	0	2.628	0	5.55	0	4701	22560	0	13.88	1	14.21	41.12	0	1.83	2	3	14	-8.84851	6	3.0517
Ni	-4.458	-0.747	4.62611	-5.78107	2	1.97	6.59	200	1.49	91	0.74	18.1688	10.9413	76	1500	225	26.07	1728	180	0.96	0.195	0	2	17.48	0.444	0	112	126	3.45605	0	2.18	0	5.2	0	3186	8908	0	10.86	1	10.32	17.48	0.595395	1.75	2	2	0	-5.54632	4	2.74307
Ni	-4.458	-0.747	4.62611	-5.78107	2	1.97	6.59	200	1.49	91	0.74	18.1688	10.9413	76	1500	225	26.07	1728	180	0.96	0.195	0	2	17.48	0.444	0	112	126	3.45605	0	2.18	0	5.2	0	3186	8908	0	10.86	1	10.32	17.48	0.595395	1.75	2	2	0	-5.54632	4	2.74307
Ni	-4.458	-0.747	4.62611	-5.78107	2	1.97	6.59	200	1.49	91	0.74	18.1688	10.9413	76	1500	225	26.07	1728	180	0.96	0.195	0	2	17.48	0.444	0	112	126	3.45605	0	2.18	0	5.2	0	3186	8908	0	10.86	1	10.32	17.48	0.595395	1.75	2	2	0	-5.54632	4	2.74307
Ni	-4.458	-0.747	4.62611	-5.78107	2	1.97	6.59	200	1.49	91	0.74	18.1688	10.9413	76	1500	225	26.07	1728	180	0.96	0.195	0	2	17.48	0.444	0	112	126	3.45605	0	2.18	0	5.2	0	3186	8908	0	10.86	1	10.32	17.48	0.595395	1.75	2	2	0	-5.54632	4	2.74307
Ni	-4.458	-0.747	4.62611	-5.78107	2	1.97	6.59	200	1.49	91	0.74	18.1688	10.9413	76	1500	225	26.07	1728	180	0.96	0.195	0	2	17.48	0.444	0	112	126	3.45605	0	2.18	0	5.2	0	3186	8908	0	10.86	1	10.32	17.48	0.595395	1.75	2	2	0	-5.54632	4	2.74307
Ni	-4.458	-0.747	4.62611	-5.78107	2	1.97	6.59	200	1.49	91	0.74	18.1688	10.9413	76	1500	225	26.07	1728	180	0.96	0.195	0	2	17.48	0.444	0	112	126	3.45605	0	2.18	0	5.2	0	3186	8908	0	10.86	1	10.32	17.48	0.595395	1.75	2	2	0	-5.54632	4	2.74307
Ni	-4.458	-0.747	4.62611	-5.78107	2	1.97	6.59	200	1.49	91	0.74	18.1688	10.9413	76	1500	225	26.07	1728	180	0.96	0.195	0	2	17.48	0.444	0	112	126	3.45605	0	2.18	0	5.2	0	3186	8908	0	10.86	1	10.32	17.48	0.595395	1.75	2	2	0	-5.54632	4	2.74307
Ni	-4.458	-0.747	4.62611	-5.78107	2	1.97	6.59	200	1.49	91	0.74	18.1688	10.9413	76	1500	225	26.07	1728	180	0.96	0.195	0	2	17.48	0.444	0	112	126	3.45605	0	2.18	0	5.2	0	3186	8908	0	10.86	1	10.32	17.48	0.595395	1.75	2	2	0	-5.54632	4	2.74307
Ni	-4.458	-0.747	4.62611	-5.78107	2	1.97	6.59	200	1.49	91	0.74	18.1688	10.9413	76	1500	225	26.07	1728	180	0.96	0.195	0	2	17.48	0.444	0	112	126	3.45605	0	2.18	0	5.2	0	3186	8908	0	10.86	1	10.32	17.48	0.595395	1.75	2	2	0	-5.54632	4	2.74307
Ni	-4.458	-0.747	4.62611	-5.78107	2	1.97	6.59	200	1.49	91	0.74	18.1688	10.9413	76	1500	225	26.07	1728	180	0.96	0.195	0	2	17.48	0.444	0	112	126	3.45605	0	2.18	0	5.2	0	3186	8908	0	10.86	1	10.32	17.48	0.595395	1.75	2	2	0	-5.54632	4	2.74307
Ni	-4.458	-0.747	4.62611	-5.78107	2	1.97	6.59	200	1.49	91	0.74	18.1688	10.9413	76	1500	225	26.07	1728	180	0.96	0.195	0	2	17.48	0.444	0	112	126	3.45605	0	2.18	0	5.2	0	3186	8908	0	10.86	1	10.32	17.48	0.595395	1.75	2	2	0	-5.54632	4	2.74307
Ni	-4.458	-0.747	4.62611	-5.78107	2	1.97	6.59	200	1.49	91	0.74	18.1688	10.9413	76	1500	225	26.07	1728	180	0.96	0.195	0	2	17.48	0.444	0	112	126	3.45605	0	2.18	0	5.2	0	3186	8908	0	10.86	1	10.32	17.48	0.595395	1.75	2	2	0	-5.54632	4	2.74307
Ni	-4.458	-0.747	4.62611	-5.78107	2	1.97	6.59	200	1.49	91	0.74	18.1688	10.9413	76	1500	225	26.07	1728	180	0.96	0.195	0	2	17.48	0.444	0	112	126	3.45605	0	2.18	0	5.2	0	3186	8908	0	10.86	1	10.32	17.48	0.595395	1.75	2	2	0	-5.54632	4	2.74307
Ni	-4.458	-0.747	4.62611	-5.78107	2	1.97	6.59	200	1.49	91	0.74	18.1688	10.9413	76	1500	225	26.07	1728	180	0.96	0.195	0	2	17.48	0.444	0	112	126	3.45605	0	2.18	0	5.2	0	3186	8908	0	10.86	1	10.32	17.48	0.595395	1.75	2	2	0	-5.54632	4	2.74307
Ni	-4.458	-0.747	4.62611	-5.78107	2	1.97	6.59	200	1.49	91	0.74	18.1688	10.9413	76	1500	225	26.07	1728	180	0.96	0.195	0	2	17.48	0.444	0	112	126	3.45605	0	2.18	0	5.2	0	3186	8908	0	10.86	1	10.32	17.48	0.595395	1.75	2	2	0	-5.54632	4	2.74307
Ni	-4.458	-0.747	4.62611	-5.78107	2	1.97	6.59	200	1.49	91	0.74	18.1688	10.9413	76	1500	225	26.07	1728	180	0.96	0.195	0	2	17.48	0.444	0	112	126	3.45605	0	2.18	0	5.2	0	3186	8908	0	10.86	1	10.32	17.48	0.595395	1.75	2	2	0	-5.54632	4	2.74307
Ni	-4.458	-0.747	4.62611	-5.78107	2	1.97	6.59	200	1.49	91	0.74	18.1688	10.9413	76	1500	225	26.07	1728	180	0.96	0.195	0	2	17.48	0.444	0	112	126	3.45605	0	2.18	0	5.2	0	3186	8908	0	10.86	1	10.32	17.48	0.595395	1.75	2	2	0	-5.54632	4	2.74307
Pd	-4.022	-3.348	4.44836	-5.18262	4	2.1	8.56	121	1.69	72	0.755	46	14.6984	44	8000	225	25.98	1828.05	180	1.08	0.4	0	0	16.74	0.244	0	53.7	142	3.86285	0	2.45	0	5.45	0	3236	12023	0	14.72	1	14.41	16.74	0	1.67	0	0	0	-5.13777	5	3.06595
Pd	-4.022	-3.348	4.44836	-5.18262	4	2.1	8.56	121	1.69	72	0.755	46	14.6984	44	8000	225	25.98	1828.05	180	1.08	0.4	0	0	16.74	0.244	0	53.7	142	3.86285	0	2.45	0	5.45	0	3236	12023	0	14.72	1	14.41	16.74	0	1.67	0	0	0	-5.13777	5	3.06595
Pd	-4.022	-3.348	4.44836	-5.18262	4	2.1	8.56	121	1.69	72	0.755	46	14.6984	44	8000	225	25.98	1828.05	180	1.08	0.4	0	0	16.74	0.244	0	53.7	142	3.86285	0	2.45	0	5.45	0	3236	12023	0	14.72	1	14.41	16.74	0	1.67	0	0	0	-5.13777	5	3.06595
Pd	-4.022	-3.348	4.44836	-5.18262	4	2.1	8.56	121	1.69	72	0.755	46	14.6984	44	8000	225	25.98	1828.05	180	1.08	0.4	0	0	16.74	0.244	0	53.7	142	3.86285	0	2.45	0	5.45	0	3236	12023	0	14.72	1	14.41	16.74	0	1.67	0	0	0	-5.13777	5	3.06595
Pd	-4.022	-3.348	4.44836	-5.18262	4	2.1	8.56	121	1.69	72	0.755	46	14.6984	44	8000	225	25.98	1828.05	180	1.08	0.4	0	0	16.74	0.244	0	53.7	142	3.86285	0	2.45	0	5.45	0	3236	12023	0	14.72	1	14.41	16.74	0	1.67	0	0	0	-5.13777	5	3.06595
Pd	-4.022	-3.348	4.44836	-5.18262	4	2.1	8.56	121	1.69	72	0.755	46	14.6984	44	8000	225	25.98	1828.05	180	1.08	0.4	0	0	16.74	0.244	0	53.7	142	3.86285	0	2.45	0	5.45	0	3236	12023	0	14.72	1	14.41	16.74	0	1.67	0	0	0	-5.13777	5	3.06595
Pd	-4.022	-3.348	4.44836	-5.18262	4	2.1	8.56	121	1.69	72	0.755	46	14.6984	44	8000	225	25.98	1828.05	180	1.08	0.4	0	0	16.74	0.244	0	53.7	142	3.86285	0	2.45	0	5.45	0	3236	12023	0	14.72	1	14.41	16.74	0	1.67	0	0	0	-5.13777	5	3.06595
Pd	-4.022	-3.348	4.44836	-5.18262	2	2.1	8.56	121	1.69	72	1	19.43	14.6984	44	8000	225	25.98	1828.05	180	1.08	0.4	0	0	16.74	0.244	0	53.7	142	3.86285	0	2.45	0	5.45	0	3236	12023	0	14.72	1	14.41	16.74	0	1.67	0	0	0	-5.13777	5	3.06595
Pd	-4.022	-3.348	4.44836	-5.18262	4	2.1	8.56	121	1.69	72	0.755	46	14.6984	44	8000	225	25.98	1828.05	180	1.08	0.4	0	0	16.74	0.244	0	53.7	142	3.86285	0	2.45	0	5.45	0	3236	12023	0	14.72	1	14.41	16.74	0	1.67	0	0	0	-5.13777	5	3.06595
Pd	-4.022	-3.348	4.44836	-5.18262	2	2.1	8.56	121	1.69	72	1	19.43	14.6984	44	8000	225	25.98	1828.05	180	1.08	0.4	0	0	16.74	0.244	0	53.7	142	3.86285	0	2.45	0	5.45	0	3236	12023	0	14.72	1	14.41	16.74	0	1.67	0	0	0	-5.13777	5	3.06595
Pd	-4.022	-3.348	4.44836	-5.18262	4	2.1	8.56	121	1.69	72	0.755	46	14.6984	44	8000	225	25.98	1828.05	180	1.08	0.4	0	0	16.74	0.244	0	53.7	142	3.86285	0	2.45	0	5.45	0	3236	12023	0	14.72	1	14.41	16.74	0	1.67	0	0	0	-5.13777	5	3.06595
Pd	-4.022	-3.348	4.44836	-5.18262	2	2.1	8.56	121	1.69	72	1	19.43	14.6984	44	8000	225	25.98	1828.05	180	1.08	0.4	0	0	16.74	0.244	0	53.7	142	3.86285	0	2.45	0	5.45	0	3236	12023	0	14.72	1	14.41	16.74	0	1.67	0	0	0	-5.13777	5	3.06595
Pd	-4.022	-3.348	4.44836	-5.18262	4	2.1	8.56	121	1.69	72	0.755	46	14.6984	44	8000	225	25.98	1828.05	180	1.08	0.4	0	0	16.74	0.244	0	53.7	142	3.86285	0	2.45	0	5.45	0	3236	12023	0	14.72	1	14.41	16.74	0	1.67	0	0	0	-5.13777	5	3.06595
Pd	-4.022	-3.348	4.44836	-5.18262	2	2.1	8.56	121	1.69	72	1	19.43	14.6984	44	8000	225	25.98	1828.05	180	1.08	0.4	0	0	16.74	0.244	0	53.7	142	3.86285	0	2.45	0	5.45	0	3236	12023	0	14.72	1	14.41	16.74	0	1.67	0	0	0	-5.13777	5	3.06595
Pd	-4.022	-3.348	4.44836	-5.18262	2	2.1	8.56	121	1.69	72	1	19.43	14.6984	44	8000	225	25.98	1828.05	180	1.08	0.4	0	0	16.74	0.244	0	53.7	142	3.86285	0	2.45	0	5.45	0	3236	12023	0	14.72	1	14.41	16.74	0	1.67	0	0	0	-5.13777	5	3.06595
Pd	-4.022	-3.348	4.44836	-5.18262	2	2.1	8.56	121	1.69	72	1	19.43	14.6984	44	8000	225	25.98	1828.05	180	1.08	0.4	0	0	16.74	0.244	0	53.7	142	3.86285	0	2.45	0	5.45	0	3236	12023	0	14.72	1	14.41	16.74	0	1.67	0	0	0	-5.13777	5	3.06595
Pd	-4.022	-3.348	4.44836	-5.18262	2	2.1	8.56	121	1.69	72	1	19.43	14.6984	44	8000	225	25.98	1828.05	180	1.08	0.4	0	0	16.74	0.244	0	53.7	142	3.86285	0	2.45	0	5.45	0	3236	12023	0	14.72	1	14.41	16.74	0	1.67	0	0	0	-5.13777	5	3.06595
Pd	-4.022	-3.348	4.44836	-5.18262	4	2.1	8.56	121	1.69	72	0.755	46	14.6984	44	8000	225	25.98	1828.05	180	1.08	0.4	0	0	16.74	0.244	0	53.7	142	3.86285	0	2.45	0	5.45	0	3236	12023	0	14.72	1	14.41	16.74	0	1.67	0	0	0	-5.13777	5	3.06595
Pd	-4.022	-3.348	4.44836	-5.18262	2	2.1	8.56	121	1.69	72	1	19.43	14.6984	44	8000	225	25.98	1828.05	180	1.08	0.4	0	0	16.74	0.244	0	53.7	142	3.86285	0	2.45	0	5.45	0	3236	12023	0	14.72	1	14.41	16.74	0	1.67	0	0	0	-5.13777	5	3.06595
Pd	-4.022	-3.348	4.44836	-5.18262	2	2.1	8.56	121	1.69	72	1	19.43	14.6984	44	8000	225	25.98	1828.05	180	1.08	0.4	0	0	16.74	0.244	0	53.7	142	3.86285	0	2.45	0	5.45	0	3236	12023	0	14.72	1	14.41	16.74	0	1.67	0	0	0	-5.13777	5	3.06595
Pd	-4.022	-3.348	4.44836	-5.18262	4	2.1	8.56	121	1.69	72	0.755	46	14.6984	44	8000	225	25.98	1828.05	180	1.08	0.4	0	0	16.74	0.244	0	53.7	142	3.86285	0	2.45	0	5.45	0	3236	12023	0	14.72	1	14.41	16.74	0	1.67	0	0	0	-5.13777	5	3.06595
Pd	-4.022	-3.348	4.44836	-5.18262	2	2.1	8.56	121	1.69	72	1	19.43	14.6984	44	8000	225	25.98	1828.05	180	1.08	0.4	0	0	16.74	0.244	0	53.7	142	3.86285	0	2.45	0	5.45	0	3236	12023	0	14.72	1	14.41	16.74	0	1.67	0	0	0	-5.13777	5	3.06595
Pt	-5.277	-0.692	5.56408	-6.05683	4	2.13	9.09	168	1.77	72	0.765	43	15.3605	61	9100	225	25.86	2041.4	230	1.24	0.51	0	2	22.175	0.133	0	205.3	139	3.91661	0	2.7	0	5.65	0	4098	21090	0	15.1	1	15.02	22.175	0	1.78	1	1	14	-6.02851	6	3.10861
Pt	-5.277	-0.692	5.56408	-6.05683	4	2.13	9.09	168	1.77	72	0.765	43	15.3605	61	9100	225	25.86	2041.4	230	1.24	0.51	0	2	22.175	0.133	0	205.3	139	3.91661	0	2.7	0	5.65	0	4098	21090	0	15.1	1	15.02	22.175	0	1.78	1	1	14	-6.02851	6	3.10861
Pt	-5.277	-0.692	5.56408	-6.05683	4	2.13	9.09	168	1.77	72	0.765	43	15.3605	61	9100	225	25.86	2041.4	230	1.24	0.51	0	2	22.175	0.133	0	205.3	139	3.91661	0	2.7	0	5.65	0	4098	21090	0	15.1	1	15.02	22.175	0	1.78	1	1	14	-6.02851	6	3.10861
Pt	-5.277	-0.692	5.56408	-6.05683	4	2.13	9.09	168	1.77	72	0.765	43	15.3605	61	9100	225	25.86	2041.4	230	1.24	0.51	0	2	22.175	0.133	0	205.3	139	3.91661	0	2.7	0	5.65	0	4098	21090	0	15.1	1	15.02	22.175	0	1.78	1	1	14	-6.02851	6	3.10861
Pt	-5.277	-0.692	5.56408	-6.05683	4	2.13	9.09	168	1.77	72	0.765	43	15.3605	61	9100	225	25.86	2041.4	230	1.24	0.51	0	2	22.175	0.133	0	205.3	139	3.91661	0	2.7	0	5.65	0	4098	21090	0	15.1	1	15.02	22.175	0	1.78	1	1	14	-6.02851	6	3.10861
Pt	-5.277	-0.692	5.56408	-6.05683	4	2.13	9.09	168	1.77	72	0.765	43	15.3605	61	9100	225	25.86	2041.4	230	1.24	0.51	0	2	22.175	0.133	0	205.3	139	3.91661	0	2.7	0	5.65	0	4098	21090	0	15.1	1	15.02	22.175	0	1.78	1	1	14	-6.02851	6	3.10861
Pt	-5.277	-0.692	5.56408	-6.05683	4	2.13	9.09	168	1.77	72	0.765	43	15.3605	61	9100	225	25.86	2041.4	230	1.24	0.51	0	2	22.175	0.133	0	205.3	139	3.91661	0	2.7	0	5.65	0	4098	21090	0	15.1	1	15.02	22.175	0	1.78	1	1	14	-6.02851	6	3.10861
Pt	-5.277	-0.692	5.56408	-6.05683	2	2.13	9.09	168	1.77	72	0.94	18.56	15.3605	61	9100	225	25.86	2041.4	230	1.24	0.51	0	2	22.175	0.133	0	205.3	139	3.91661	0	2.7	0	5.65	0	4098	21090	0	15.1	1	15.02	22.175	0	1.78	1	1	14	-6.02851	6	3.10861
Pt	-5.277	-0.692	5.56408	-6.05683	4	2.13	9.09	168	1.77	72	0.765	43	15.3605	61	9100	225	25.86	2041.4	230	1.24	0.51	0	2	22.175	0.133	0	205.3	139	3.91661	0	2.7	0	5.65	0	4098	21090	0	15.1	1	15.02	22.175	0	1.78	1	1	14	-6.02851	6	3.10861
Pt	-5.277	-0.692	5.56408	-6.05683	2	2.13	9.09	168	1.77	72	0.94	18.56	15.3605	61	9100	225	25.86	2041.4	230	1.24	0.51	0	2	22.175	0.133	0	205.3	139	3.91661	0	2.7	0	5.65	0	4098	21090	0	15.1	1	15.02	22.175	0	1.78	1	1	14	-6.02851	6	3.10861
Pt	-5.277	-0.692	5.56408	-6.05683	4	2.13	9.09	168	1.77	72	0.765	43	15.3605	61	9100	225	25.86	2041.4	230	1.24	0.51	0	2	22.175	0.133	0	205.3	139	3.91661	0	2.7	0	5.65	0	4098	21090	0	15.1	1	15.02	22.175	0	1.78	1	1	14	-6.02851	6	3.10861
Pt	-5.277	-0.692	5.56408	-6.05683	2	2.13	9.09	168	1.77	72	0.94	18.56	15.3605	61	9100	225	25.86	2041.4	230	1.24	0.51	0	2	22.175	0.133	0	205.3	139	3.91661	0	2.7	0	5.65	0	4098	21090	0	15.1	1	15.02	22.175	0	1.78	1	1	14	-6.02851	6	3.10861
Pt	-5.277	-0.692	5.56408	-6.05683	4	2.13	9.09	168	1.77	72	0.765	43	15.3605	61	9100	225	25.86	2041.4	230	1.24	0.51	0	2	22.175	0.133	0	205.3	139	3.91661	0	2.7	0	5.65	0	4098	21090	0	15.1	1	15.02	22.175	0	1.78	1	1	14	-6.02851	6	3.10861
Pt	-5.277	-0.692	5.56408	-6.05683	2	2.13	9.09	168	1.77	72	0.94	18.56	15.3605	61	9100	225	25.86	2041.4	230	1.24	0.51	0	2	22.175	0.133	0	205.3	139	3.91661	0	2.7	0	5.65	0	4098	21090	0	15.1	1	15.02	22.175	0	1.78	1	1	14	-6.02851	6	3.10861
Pt	-5.277	-0.692	5.56408	-6.05683	2	2.13	9.09	168	1.77	72	0.94	18.56	15.3605	61	9100	225	25.86	2041.4	230	1.24	0.51	0	2	22.175	0.133	0	205.3	139	3.91661	0	2.7	0	5.65	0	4098	21090	0	15.1	1	15.02	22.175	0	1.78	1	1	14	-6.02851	6	3.10861
Pt	-5.277	-0.692	5.56408	-6.05683	2	2.13	9.09	168	1.77	72	0.94	18.56	15.3605	61	9100	225	25.86	2041.4	230	1.24	0.51	0	2	22.175	0.133	0	205.3	139	3.91661	0	2.7	0	5.65	0	4098	21090	0	15.1	1	15.02	22.175	0	1.78	1	1	14	-6.02851	6	3.10861
Pt	-5.277	-0.692	5.56408	-6.05683	2	2.13	9.09	168	1.77	72	0.94	18.56	15.3605	61	9100	225	25.86	2041.4	230	1.24	0.51	0	2	22.175	0.133	0	205.3	139	3.91661	0	2.7	0	5.65	0	4098	21090	0	15.1	1	15.02	22.175	0	1.78	1	1	14	-6.02851	6	3.10861
Pt	-5.277	-0.692	5.56408	-6.05683	4	2.13	9.09	168	1.77	72	0.765	43	15.3605	61	9100	225	25.86	2041.4	230	1.24	0.51	0	2	22.175	0.133	0	205.3	139	3.91661	0	2.7	0	5.65	0	4098	21090	0	15.1	1	15.02	22.175	0	1.78	1	1	14	-6.02851	6	3.10861
Pt	-5.277	-0.692	5.56408	-6.05683	2	2.13	9.09	168	1.77	72	0.94	18.56	15.3605	61	9100	225	25.86	2041.4	230	1.24	0.51	0	2	22.175	0.133	0	205.3	139	3.91661	0	2.7	0	5.65	0	4098	21090	0	15.1	1	15.02	22.175	0	1.78	1	1	14	-6.02851	6	3.10861
Pt	-5.277	-0.692	5.56408	-6.05683	2	2.13	9.09	168	1.77	72	0.94	18.56	15.3605	61	9100	225	25.86	2041.4	230	1.24	0.51	0	2	22.175	0.133	0	205.3	139	3.91661	0	2.7	0	5.65	0	4098	21090	0	15.1	1	15.02	22.175	0	1.78	1	1	14	-6.02851	6	3.10861
Pt	-5.277	-0.692	5.56408	-6.05683	4	2.13	9.09	168	1.77	72	0.765	43	15.3605	61	9100	225	25.86	2041.4	230	1.24	0.51	0	2	22.175	0.133	0	205.3	139	3.91661	0	2.7	0	5.65	0	4098	21090	0	15.1	1	15.02	22.175	0	1.78	1	1	14	-6.02851	6	3.10861
Pt	-5.277	-0.692	5.56408	-6.05683	2	2.13	9.09	168	1.77	72	0.94	18.56	15.3605	61	9100	225	25.86	2041.4	230	1.24	0.51	0	2	22.175	0.133	0	205.3	139	3.91661	0	2.7	0	5.65	0	4098	21090	0	15.1	1	15.02	22.175	0	1.78	1	1	14	-6.02851	6	3.10861
Cu	-4.613	-0.692	4.47686	-4.0993	2	1.96	7.11	130	1.45	400	0.87	20.2924	11.8299	48	1500	225	24.44	1357.77	140	0.88	0.185	0	1	13.6	0.385	0	118.4	126	3.53782	0	2.04	0	4.45	0	3200	8920	0	11.81	1	11.07	13.6	0	1.47	1	0	0	-3.68065	4	2.80797
Cu	-4.613	-0.692	4.47686	-4.0993	2	1.96	7.11	130	1.45	400	0.87	20.2924	11.8299	48	1500	225	24.44	1357.77	140	0.88	0.185	0	1	13.6	0.385	0	118.4	126	3.53782	0	2.04	0	4.45	0	3200	8920	0	11.81	1	11.07	13.6	0	1.47	1	0	0	-3.68065	4	2.80797
Cu	-4.613	-0.692	4.47686	-4.0993	2	1.96	7.11	130	1.45	400	0.87	20.2924	11.8299	48	1500	225	24.44	1357.77	140	0.88	0.185	0	1	13.6	0.385	0	118.4	126	3.53782	0	2.04	0	4.45	0	3200	8920	0	11.81	1	11.07	13.6	0	1.47	1	0	0	-3.68065	4	2.80797
Cu	-4.613	-0.692	4.47686	-4.0993	2	1.96	7.11	130	1.45	400	0.87	20.2924	11.8299	48	1500	225	24.44	1357.77	140	0.88	0.185	0	1	13.6	0.385	0	118.4	126	3.53782	0	2.04	0	4.45	0	3200	8920	0	11.81	1	11.07	13.6	0	1.47	1	0	0	-3.68065	4	2.80797
Cu	-4.613	-0.692	4.47686	-4.0993	2	1.96	7.11	130	1.45	400	0.87	20.2924	11.8299	48	1500	225	24.44	1357.77	140	0.88	0.185	0	1	13.6	0.385	0	118.4	126	3.53782	0	2.04	0	4.45	0	3200	8920	0	11.81	1	11.07	13.6	0	1.47	1	0	0	-3.68065	4	2.80797
Cu	-4.613	-0.692	4.47686	-4.0993	2	1.96	7.11	130	1.45	400	0.87	20.2924	11.8299	48	1500	225	24.44	1357.77	140	0.88	0.185	0	1	13.6	0.385	0	118.4	126	3.53782	0	2.04	0	4.45	0	3200	8920	0	11.81	1	11.07	13.6	0	1.47	1	0	0	-3.68065	4	2.80797
Cu	-4.613	-0.692	4.47686	-4.0993	2	1.96	7.11	130	1.45	400	0.87	20.2924	11.8299	48	1500	225	24.44	1357.77	140	0.88	0.185	0	1	13.6	0.385	0	118.4	126	3.53782	0	2.04	0	4.45	0	3200	8920	0	11.81	1	11.07	13.6	0	1.47	1	0	0	-3.68065	4	2.80797
Cu	-4.613	-0.692	4.47686	-4.0993	2	1.96	7.11	130	1.45	400	0.87	20.2924	11.8299	48	1500	225	24.44	1357.77	140	0.88	0.185	0	1	13.6	0.385	0	118.4	126	3.53782	0	2.04	0	4.45	0	3200	8920	0	11.81	1	11.07	13.6	0	1.47	1	0	0	-3.68065	4	2.80797
Cu	-4.613	-0.692	4.47686	-4.0993	2	1.96	7.11	130	1.45	400	0.87	20.2924	11.8299	48	1500	225	24.44	1357.77	140	0.88	0.185	0	1	13.6	0.385	0	118.4	126	3.53782	0	2.04	0	4.45	0	3200	8920	0	11.81	1	11.07	13.6	0	1.47	1	0	0	-3.68065	4	2.80797
Cu	-4.613	-0.692	4.47686	-4.0993	2	1.96	7.11	130	1.45	400	0.87	20.2924	11.8299	48	1500	225	24.44	1357.77	140	0.88	0.185	0	1	13.6	0.385	0	118.4	126	3.53782	0	2.04	0	4.45	0	3200	8920	0	11.81	1	11.07	13.6	0	1.47	1	0	0	-3.68065	4	2.80797
Cu	-4.613	-0.692	4.47686	-4.0993	2	1.96	7.11	130	1.45	400	0.87	20.2924	11.8299	48	1500	225	24.44	1357.77	140	0.88	0.185	0	1	13.6	0.385	0	118.4	126	3.53782	0	2.04	0	4.45	0	3200	8920	0	11.81	1	11.07	13.6	0	1.47	1	0	0	-3.68065	4	2.80797
Cu	-4.613	-0.692	4.47686	-4.0993	2	1.96	7.11	130	1.45	400	0.87	20.2924	11.8299	48	1500	225	24.44	1357.77	140	0.88	0.185	0	1	13.6	0.385	0	118.4	126	3.53782	0	2.04	0	4.45	0	3200	8920	0	11.81	1	11.07	13.6	0	1.47	1	0	0	-3.68065	4	2.80797
Cu	-4.613	-0.692	4.47686	-4.0993	2	1.96	7.11	130	1.45	400	0.87	20.2924	11.8299	48	1500	225	24.44	1357.77	140	0.88	0.185	0	1	13.6	0.385	0	118.4	126	3.53782	0	2.04	0	4.45	0	3200	8920	0	11.81	1	11.07	13.6	0	1.47	1	0	0	-3.68065	4	2.80797
Cu	-4.613	-0.692	4.47686	-4.0993	2	1.96	7.11	130	1.45	400	0.87	20.2924	11.8299	48	1500	225	24.44	1357.77	140	0.88	0.185	0	1	13.6	0.385	0	118.4	126	3.53782	0	2.04	0	4.45	0	3200	8920	0	11.81	1	11.07	13.6	0	1.47	1	0	0	-3.68065	4	2.80797
Cu	-4.613	-0.692	4.47686	-4.0993	2	1.96	7.11	130	1.45	400	0.87	20.2924	11.8299	48	1500	225	24.44	1357.77	140	0.88	0.185	0	1	13.6	0.385	0	118.4	126	3.53782	0	2.04	0	4.45	0	3200	8920	0	11.81	1	11.07	13.6	0	1.47	1	0	0	-3.68065	4	2.80797
Cu	-4.613	-0.692	4.47686	-4.0993	2	1.96	7.11	130	1.45	400	0.87	20.2924	11.8299	48	1500	225	24.44	1357.77	140	0.88	0.185	0	1	13.6	0.385	0	118.4	126	3.53782	0	2.04	0	4.45	0	3200	8920	0	11.81	1	11.07	13.6	0	1.47	1	0	0	-3.68065	4	2.80797
Cu	-4.613	-0.692	4.47686	-4.0993	2	1.96	7.11	130	1.45	400	0.87	20.2924	11.8299	48	1500	225	24.44	1357.77	140	0.88	0.185	0	1	13.6	0.385	0	118.4	126	3.53782	0	2.04	0	4.45	0	3200	8920	0	11.81	1	11.07	13.6	0	1.47	1	0	0	-3.68065	4	2.80797
Ag	-4.405	-0.729	4.43955	-2.83174	1	2.11	10.27	83	1.65	430	1.29	7.57623	17.0756	30	1400	225	25.35	1234.93	100	1.045	0.385	0	1	11.3	0.235	0	125.6	144	4.02731	0	2.375	0	4.35	0	2435	10490	0	17.05	1	16.33	11.3	0	1.36	1	0	0	-2.76539	5	3.19648
Ag	-4.405	-0.729	4.43955	-2.83174	1	2.11	10.27	83	1.65	430	1.29	7.57623	17.0756	30	1400	225	25.35	1234.93	100	1.045	0.385	0	1	11.3	0.235	0	125.6	144	4.02731	0	2.375	0	4.35	0	2435	10490	0	17.05	1	16.33	11.3	0	1.36	1	0	0	-2.76539	5	3.19648
Ag	-4.405	-0.729	4.43955	-2.83174	1	2.11	10.27	83	1.65	430	1.29	7.57623	17.0756	30	1400	225	25.35	1234.93	100	1.045	0.385	0	1	11.3	0.235	0	125.6	144	4.02731	0	2.375	0	4.35	0	2435	10490	0	17.05	1	16.33	11.3	0	1.36	1	0	0	-2.76539	5	3.19648
Ag	-4.405	-0.729	4.43955	-2.83174	1	2.11	10.27	83	1.65	430	1.29	7.57623	17.0756	30	1400	225	25.35	1234.93	100	1.045	0.385	0	1	11.3	0.235	0	125.6	144	4.02731	0	2.375	0	4.35	0	2435	10490	0	17.05	1	16.33	11.3	0	1.36	1	0	0	-2.76539	5	3.19648
Ag	-4.405	-0.729	4.43955	-2.83174	1	2.11	10.27	83	1.65	430	1.29	7.57623	17.0756	30	1400	225	25.35	1234.93	100	1.045	0.385	0	1	11.3	0.235	0	125.6	144	4.02731	0	2.375	0	4.35	0	2435	10490	0	17.05	1	16.33	11.3	0	1.36	1	0	0	-2.76539	5	3.19648
Ag	-4.405	-0.729	4.43955	-2.83174	1	2.11	10.27	83	1.65	430	1.29	7.57623	17.0756	30	1400	225	25.35	1234.93	100	1.045	0.385	0	1	11.3	0.235	0	125.6	144	4.02731	0	2.375	0	4.35	0	2435	10490	0	17.05	1	16.33	11.3	0	1.36	1	0	0	-2.76539	5	3.19648
Au	-5.76	-0.764	5.76722	-3.27381	3	2.14	10.21	78	1.74	320	0.99	30	16.9471	27	1000	225	25.418	1337.33	220	1.21	0.488	0	1	12.55	0.129	0	222.8	143	4.0575	0	2.66	0	5.15	0	3129	19300	0	16.96	1	16.7	12.55	0	1.57	1	0	14	-3.20969	6	3.22044
Au	-5.76	-0.764	5.76722	-3.27381	3	2.14	10.21	78	1.74	320	0.99	30	16.9471	27	1000	225	25.418	1337.33	220	1.21	0.488	0	1	12.55	0.129	0	222.8	143	4.0575	0	2.66	0	5.15	0	3129	19300	0	16.96	1	16.7	12.55	0	1.57	1	0	14	-3.20969	6	3.22044
Au	-5.76	-0.764	5.76722	-3.27381	3	2.14	10.21	78	1.74	320	0.99	30	16.9471	27	1000	225	25.418	1337.33	220	1.21	0.488	0	1	12.55	0.129	0	222.8	143	4.0575	0	2.66	0	5.15	0	3129	19300	0	16.96	1	16.7	12.55	0	1.57	1	0	14	-3.20969	6	3.22044
Au	-5.76	-0.764	5.76722	-3.27381	3	2.14	10.21	78	1.74	320	0.99	30	16.9471	27	1000	225	25.418	1337.33	220	1.21	0.488	0	1	12.55	0.129	0	222.8	143	4.0575	0	2.66	0	5.15	0	3129	19300	0	16.96	1	16.7	12.55	0	1.57	1	0	14	-3.20969	6	3.22044
Au	-5.76	-0.764	5.76722	-3.27381	3	2.14	10.21	78	1.74	320	0.99	30	16.9471	27	1000	225	25.418	1337.33	220	1.21	0.488	0	1	12.55	0.129	0	222.8	143	4.0575	0	2.66	0	5.15	0	3129	19300	0	16.96	1	16.7	12.55	0	1.57	1	0	14	-3.20969	6	3.22044
Au	-5.76	-0.764	5.76722	-3.27381	3	2.14	10.21	78	1.74	320	0.99	30	16.9471	27	1000	225	25.418	1337.33	220	1.21	0.488	0	1	12.55	0.129	0	222.8	143	4.0575	0	2.66	0	5.15	0	3129	19300	0	16.96	1	16.7	12.55	0	1.57	1	0	14	-3.20969	6	3.22044
Au	-5.76	-0.764	5.76722	-3.27381	3	2.14	10.21	78	1.74	320	0.99	30	16.9471	27	1000	225	25.418	1337.33	220	1.21	0.488	0	1	12.55	0.129	0	222.8	143	4.0575	0	2.66	0	5.15	0	3129	19300	0	16.96	1	16.7	12.55	0	1.57	1	0	14	-3.20969	6	3.22044
Au	-5.76	-0.764	5.76722	-3.27381	3	2.14	10.21	78	1.74	320	0.99	30	16.9471	27	1000	225	25.418	1337.33	220	1.21	0.488	0	1	12.55	0.129	0	222.8	143	4.0575	0	2.66	0	5.15	0	3129	19300	0	16.96	1	16.7	12.55	0	1.57	1	0	14	-3.20969	6	3.22044
Au	-5.76	-0.764	5.76722	-3.27381	3	2.14	10.21	78	1.74	320	0.99	30	16.9471	27	1000	225	25.418	1337.33	220	1.21	0.488	0	1	12.55	0.129	0	222.8	143	4.0575	0	2.66	0	5.15	0	3129	19300	0	16.96	1	16.7	12.55	0	1.57	1	0	14	-3.20969	6	3.22044
Au	-5.76	-0.764	5.76722	-3.27381	3	2.14	10.21	78	1.74	320	0.99	30	16.9471	27	1000	225	25.418	1337.33	220	1.21	0.488	0	1	12.55	0.129	0	222.8	143	4.0575	0	2.66	0	5.15	0	3129	19300	0	16.96	1	16.7	12.55	0	1.57	1	0	14	-3.20969	6	3.22044
Au	-5.76	-0.764	5.76722	-3.27381	3	2.14	10.21	78	1.74	320	0.99	30	16.9471	27	1000	225	25.418	1337.33	220	1.21	0.488	0	1	12.55	0.129	0	222.8	143	4.0575	0	2.66	0	5.15	0	3129	19300	0	16.96	1	16.7	12.55	0	1.57	1	0	14	-3.20969	6	3.22044
Au	-5.76	-0.764	5.76722	-3.27381	3	2.14	10.21	78	1.74	320	0.99	30	16.9471	27	1000	225	25.418	1337.33	220	1.21	0.488	0	1	12.55	0.129	0	222.8	143	4.0575	0	2.66	0	5.15	0	3129	19300	0	16.96	1	16.7	12.55	0	1.57	1	0	14	-3.20969	6	3.22044
Au	-5.76	-0.764	5.76722	-3.27381	3	2.14	10.21	78	1.74	320	0.99	30	16.9471	27	1000	225	25.418	1337.33	220	1.21	0.488	0	1	12.55	0.129	0	222.8	143	4.0575	0	2.66	0	5.15	0	3129	19300	0	16.96	1	16.7	12.55	0	1.57	1	0	14	-3.20969	6	3.22044
Au	-5.76	-0.764	5.76722	-3.27381	3	2.14	10.21	78	1.74	320	0.99	30	16.9471	27	1000	225	25.418	1337.33	220	1.21	0.488	0	1	12.55	0.129	0	222.8	143	4.0575	0	2.66	0	5.15	0	3129	19300	0	16.96	1	16.7	12.55	0	1.57	1	0	14	-3.20969	6	3.22044
Au	-5.76	-0.764	5.76722	-3.27381	3	2.14	10.21	78	1.74	320	0.99	30	16.9471	27	1000	225	25.418	1337.33	220	1.21	0.488	0	1	12.55	0.129	0	222.8	143	4.0575	0	2.66	0	5.15	0	3129	19300	0	16.96	1	16.7	12.55	0	1.57	1	0	14	-3.20969	6	3.22044
Au	-5.76	-0.764	5.76722	-3.27381	3	2.14	10.21	78	1.74	320	0.99	30	16.9471	27	1000	225	25.418	1337.33	220	1.21	0.488	0	1	12.55	0.129	0	222.8	143	4.0575	0	2.66	0	5.15	0	3129	19300	0	16.96	1	16.7	12.55	0	1.57	1	0	14	-3.20969	6	3.22044
Au	-5.76	-0.764	5.76722	-3.27381	3	2.14	10.21	78	1.74	320	0.99	30	16.9471	27	1000	225	25.418	1337.33	220	1.21	0.488	0	1	12.55	0.129	0	222.8	143	4.0575	0	2.66	0	5.15	0	3129	19300	0	16.96	1	16.7	12.55	0	1.57	1	0	14	-3.20969	6	3.22044
Au	-5.76	-0.764	5.76722	-3.27381	3	2.14	10.21	78	1.74	320	0.99	30	16.9471	27	1000	225	25.418	1337.33	220	1.21	0.488	0	1	12.55	0.129	0	222.8	143	4.0575	0	2.66	0	5.15	0	3129	19300	0	16.96	1	16.7	12.55	0	1.57	1	0	14	-3.20969	6	3.22044
Zn	-5.979	-1.113	4.74374	-1.27283	2	2.01	9.16	108	1.42	120	0.88	17.9644	15.2057	43	1900	194	25.39	692.68	70	0.82	0.175	0	0	7.068	0.388	0	0	140	3.82222	0	1.88	0	4.1	0	1180	7140	0	15.19	1	13.96	7.068	0	1.32	2	0	0	-1.24	4	3.03369
Zn	-5.979	-1.113	4.74374	-1.27283	2	2.01	9.16	108	1.42	120	0.88	17.9644	15.2057	43	1900	194	25.39	692.68	70	0.82	0.175	0	0	7.068	0.388	0	0	140	3.82222	0	1.88	0	4.1	0	1180	7140	0	15.19	1	13.96	7.068	0	1.32	2	0	0	-1.24	4	3.03369
Zn	-5.979	-1.113	4.74374	-1.27283	2	2.01	9.16	108	1.42	120	0.88	17.9644	15.2057	43	1900	194	25.39	692.68	70	0.82	0.175	0	0	7.068	0.388	0	0	140	3.82222	0	1.88	0	4.1	0	1180	7140	0	15.19	1	13.96	7.068	0	1.32	2	0	0	-1.24	4	3.03369
Zn	-5.979	-1.113	4.74374	-1.27283	2	2.01	9.16	108	1.42	120	0.88	17.9644	15.2057	43	1900	194	25.39	692.68	70	0.82	0.175	0	0	7.068	0.388	0	0	140	3.82222	0	1.88	0	4.1	0	1180	7140	0	15.19	1	13.96	7.068	0	1.32	2	0	0	-1.24	4	3.03369
Zn	-5.979	-1.113	4.74374	-1.27283	2	2.01	9.16	108	1.42	120	0.88	17.9644	15.2057	43	1900	194	25.39	692.68	70	0.82	0.175	0	0	7.068	0.388	0	0	140	3.82222	0	1.88	0	4.1	0	1180	7140	0	15.19	1	13.96	7.068	0	1.32	2	0	0	-1.24	4	3.03369
Zn	-5.979	-1.113	4.74374	-1.27283	2	2.01	9.16	108	1.42	120	0.88	17.9644	15.2057	43	1900	194	25.39	692.68	70	0.82	0.175	0	0	7.068	0.388	0	0	140	3.82222	0	1.88	0	4.1	0	1180	7140	0	15.19	1	13.96	7.068	0	1.32	2	0	0	-1.24	4	3.03369
Zn	-5.979	-1.113	4.74374	-1.27283	2	2.01	9.16	108	1.42	120	0.88	17.9644	15.2057	43	1900	194	25.39	692.68	70	0.82	0.175	0	0	7.068	0.388	0	0	140	3.82222	0	1.88	0	4.1	0	1180	7140	0	15.19	1	13.96	7.068	0	1.32	2	0	0	-1.24	4	3.03369
Zn	-5.979	-1.113	4.74374	-1.27283	2	2.01	9.16	108	1.42	120	0.88	17.9644	15.2057	43	1900	194	25.39	692.68	70	0.82	0.175	0	0	7.068	0.388	0	0	140	3.82222	0	1.88	0	4.1	0	1180	7140	0	15.19	1	13.96	7.068	0	1.32	2	0	0	-1.24	4	3.03369
Zn	-5.979	-1.113	4.74374	-1.27283	2	2.01	9.16	108	1.42	120	0.88	17.9644	15.2057	43	1900	194	25.39	692.68	70	0.82	0.175	0	0	7.068	0.388	0	0	140	3.82222	0	1.88	0	4.1	0	1180	7140	0	15.19	1	13.96	7.068	0	1.32	2	0	0	-1.24	4	3.03369
Zn	-5.979	-1.113	4.74374	-1.27283	2	2.01	9.16	108	1.42	120	0.88	17.9644	15.2057	43	1900	194	25.39	692.68	70	0.82	0.175	0	0	7.068	0.388	0	0	140	3.82222	0	1.88	0	4.1	0	1180	7140	0	15.19	1	13.96	7.068	0	1.32	2	0	0	-1.24	4	3.03369
Zn	-5.979	-1.113	4.74374	-1.27283	2	2.01	9.16	108	1.42	120	0.88	17.9644	15.2057	43	1900	194	25.39	692.68	70	0.82	0.175	0	0	7.068	0.388	0	0	140	3.82222	0	1.88	0	4.1	0	1180	7140	0	15.19	1	13.96	7.068	0	1.32	2	0	0	-1.24	4	3.03369
Zn	-5.979	-1.113	4.74374	-1.27283	2	2.01	9.16	108	1.42	120	0.88	17.9644	15.2057	43	1900	194	25.39	692.68	70	0.82	0.175	0	0	7.068	0.388	0	0	140	3.82222	0	1.88	0	4.1	0	1180	7140	0	15.19	1	13.96	7.068	0	1.32	2	0	0	-1.24	4	3.03369
Zn	-5.979	-1.113	4.74374	-1.27283	2	2.01	9.16	108	1.42	120	0.88	17.9644	15.2057	43	1900	194	25.39	692.68	70	0.82	0.175	0	0	7.068	0.388	0	0	140	3.82222	0	1.88	0	4.1	0	1180	7140	0	15.19	1	13.96	7.068	0	1.32	2	0	0	-1.24	4	3.03369
Zn	-5.979	-1.113	4.74374	-1.27283	2	2.01	9.16	108	1.42	120	0.88	17.9644	15.2057	43	1900	194	25.39	692.68	70	0.82	0.175	0	0	7.068	0.388	0	0	140	3.82222	0	1.88	0	4.1	0	1180	7140	0	15.19	1	13.96	7.068	0	1.32	2	0	0	-1.24	4	3.03369
Zn	-5.979	-1.113	4.74374	-1.27283	2	2.01	9.16	108	1.42	120	0.88	17.9644	15.2057	43	1900	194	25.39	692.68	70	0.82	0.175	0	0	7.068	0.388	0	0	140	3.82222	0	1.88	0	4.1	0	1180	7140	0	15.19	1	13.96	7.068	0	1.32	2	0	0	-1.24	4	3.03369
Zn	-5.979	-1.113	4.74374	-1.27283	2	2.01	9.16	108	1.42	120	0.88	17.9644	15.2057	43	1900	194	25.39	692.68	70	0.82	0.175	0	0	7.068	0.388	0	0	140	3.82222	0	1.88	0	4.1	0	1180	7140	0	15.19	1	13.96	7.068	0	1.32	2	0	0	-1.24	4	3.03369
Zn	-5.979	-1.113	4.74374	-1.27283	2	2.01	9.16	108	1.42	120	0.88	17.9644	15.2057	43	1900	194	25.39	692.68	70	0.82	0.175	0	0	7.068	0.388	0	0	140	3.82222	0	1.88	0	4.1	0	1180	7140	0	15.19	1	13.96	7.068	0	1.32	2	0	0	-1.24	4	3.03369
Cd	-5.659	-1.181	4.36182	-0.91473	2	2.18	13	50	1.61	97	1.09	16.9083	21.58	19	1300	194	26.02	594.22	42	0.985	0.37	0	0	6.21	0.231	0	0	157	4.27229	0	2.215	0	4.05	0	1040	8650	0	21.59	1	19.495	6.21	0	1.24	2	0	0	-0.812174	5	3.39092
Cd	-5.659	-1.181	4.36182	-0.91473	2	2.18	13	50	1.61	97	1.09	16.9083	21.58	19	1300	194	26.02	594.22	42	0.985	0.37	0	0	6.21	0.231	0	0	157	4.27229	0	2.215	0	4.05	0	1040	8650	0	21.59	1	19.495	6.21	0	1.24	2	0	0	-0.812174	5	3.39092
Cd	-5.659	-1.181	4.36182	-0.91473	2	2.18	13	50	1.61	97	1.09	16.9083	21.58	19	1300	194	26.02	594.22	42	0.985	0.37	0	0	6.21	0.231	0	0	157	4.27229	0	2.215	0	4.05	0	1040	8650	0	21.59	1	19.495	6.21	0	1.24	2	0	0	-0.812174	5	3.39092
Cd	-5.659	-1.181	4.36182	-0.91473	2	2.18	13	50	1.61	97	1.09	16.9083	21.58	19	1300	194	26.02	594.22	42	0.985	0.37	0	0	6.21	0.231	0	0	157	4.27229	0	2.215	0	4.05	0	1040	8650	0	21.59	1	19.495	6.21	0	1.24	2	0	0	-0.812174	5	3.39092
Cd	-5.659	-1.181	4.36182	-0.91473	2	2.18	13	50	1.61	97	1.09	16.9083	21.58	19	1300	194	26.02	594.22	42	0.985	0.37	0	0	6.21	0.231	0	0	157	4.27229	0	2.215	0	4.05	0	1040	8650	0	21.59	1	19.495	6.21	0	1.24	2	0	0	-0.812174	5	3.39092
Cd	-5.659	-1.181	4.36182	-0.91473	2	2.18	13	50	1.61	97	1.09	16.9083	21.58	19	1300	194	26.02	594.22	42	0.985	0.37	0	0	6.21	0.231	0	0	157	4.27229	0	2.215	0	4.05	0	1040	8650	0	21.59	1	19.495	6.21	0	1.24	2	0	0	-0.812174	5	3.39092
Cd	-5.659	-1.181	4.36182	-0.91473	2	2.18	13	50	1.61	97	1.09	16.9083	21.58	19	1300	194	26.02	594.22	42	0.985	0.37	0	0	6.21	0.231	0	0	157	4.27229	0	2.215	0	4.05	0	1040	8650	0	21.59	1	19.495	6.21	0	1.24	2	0	0	-0.812174	5	3.39092
Cd	-5.659	-1.181	4.36182	-0.91473	2	2.18	13	50	1.61	97	1.09	16.9083	21.58	19	1300	194	26.02	594.22	42	0.985	0.37	0	0	6.21	0.231	0	0	157	4.27229	0	2.215	0	4.05	0	1040	8650	0	21.59	1	19.495	6.21	0	1.24	2	0	0	-0.812174	5	3.39092
Cd	-5.659	-1.181	4.36182	-0.91473	2	2.18	13	50	1.61	97	1.09	16.9083	21.58	19	1300	194	26.02	594.22	42	0.985	0.37	0	0	6.21	0.231	0	0	157	4.27229	0	2.215	0	4.05	0	1040	8650	0	21.59	1	19.495	6.21	0	1.24	2	0	0	-0.812174	5	3.39092
Cd	-5.659	-1.181	4.36182	-0.91473	2	2.18	13	50	1.61	97	1.09	16.9083	21.58	19	1300	194	26.02	594.22	42	0.985	0.37	0	0	6.21	0.231	0	0	157	4.27229	0	2.215	0	4.05	0	1040	8650	0	21.59	1	19.495	6.21	0	1.24	2	0	0	-0.812174	5	3.39092
Cd	-5.659	-1.181	4.36182	-0.91473	2	2.18	13	50	1.61	97	1.09	16.9083	21.58	19	1300	194	26.02	594.22	42	0.985	0.37	0	0	6.21	0.231	0	0	157	4.27229	0	2.215	0	4.05	0	1040	8650	0	21.59	1	19.495	6.21	0	1.24	2	0	0	-0.812174	5	3.39092
Cd	-5.659	-1.181	4.36182	-0.91473	2	2.18	13	50	1.61	97	1.09	16.9083	21.58	19	1300	194	26.02	594.22	42	0.985	0.37	0	0	6.21	0.231	0	0	157	4.27229	0	2.215	0	4.05	0	1040	8650	0	21.59	1	19.495	6.21	0	1.24	2	0	0	-0.812174	5	3.39092
Cd	-5.659	-1.181	4.36182	-0.91473	2	2.18	13	50	1.61	97	1.09	16.9083	21.58	19	1300	194	26.02	594.22	42	0.985	0.37	0	0	6.21	0.231	0	0	157	4.27229	0	2.215	0	4.05	0	1040	8650	0	21.59	1	19.495	6.21	0	1.24	2	0	0	-0.812174	5	3.39092
Cd	-5.659	-1.181	4.36182	-0.91473	2	2.18	13	50	1.61	97	1.09	16.9083	21.58	19	1300	194	26.02	594.22	42	0.985	0.37	0	0	6.21	0.231	0	0	157	4.27229	0	2.215	0	4.05	0	1040	8650	0	21.59	1	19.495	6.21	0	1.24	2	0	0	-0.812174	5	3.39092
Cd	-5.659	-1.181	4.36182	-0.91473	2	2.18	13	50	1.61	97	1.09	16.9083	21.58	19	1300	194	26.02	594.22	42	0.985	0.37	0	0	6.21	0.231	0	0	157	4.27229	0	2.215	0	4.05	0	1040	8650	0	21.59	1	19.495	6.21	0	1.24	2	0	0	-0.812174	5	3.39092
Cd	-5.659	-1.181	4.36182	-0.91473	2	2.18	13	50	1.61	97	1.09	16.9083	21.58	19	1300	194	26.02	594.22	42	0.985	0.37	0	0	6.21	0.231	0	0	157	4.27229	0	2.215	0	4.05	0	1040	8650	0	21.59	1	19.495	6.21	0	1.24	2	0	0	-0.812174	5	3.39092
Cd	-5.659	-1.181	4.36182	-0.91473	2	2.18	13	50	1.61	97	1.09	16.9083	21.58	19	1300	194	26.02	594.22	42	0.985	0.37	0	0	6.21	0.231	0	0	157	4.27229	0	2.215	0	4.05	0	1040	8650	0	21.59	1	19.495	6.21	0	1.24	2	0	0	-0.812174	5	3.39092
Hg	-6.815	-1.042	5.12515	-0.27968	1	2.23	14.09	78	1.71	8.3	1.33	10.4375	24.6117	64.50420054200542	3100	166	27.983	234.32	25	1.07	0.475	0	0	2.295	0.14	0	0	152	4.65625	0	2.41	0	4.2	0	629.73	13534	0	23.82	1	25.2376	2.295	0	1.24	2	0	14	-0.250106	6	3.69567
Hg	-6.815	-1.042	5.12515	-0.27968	2	2.23	14.09	78	1.71	8.3	1.16	18.7569	24.6117	64.50420054200542	3100	166	27.983	234.32	25	1.07	0.475	0	0	2.295	0.14	0	0	152	4.65625	0	2.41	0	4.2	0	629.73	13534	0	23.82	1	25.2376	2.295	0	1.24	2	0	14	-0.250106	6	3.69567
Hg	-6.815	-1.042	5.12515	-0.27968	2	2.23	14.09	78	1.71	8.3	1.16	18.7569	24.6117	64.50420054200542	3100	166	27.983	234.32	25	1.07	0.475	0	0	2.295	0.14	0	0	152	4.65625	0	2.41	0	4.2	0	629.73	13534	0	23.82	1	25.2376	2.295	0	1.24	2	0	14	-0.250106	6	3.69567
Hg	-6.815	-1.042	5.12515	-0.27968	2	2.23	14.09	78	1.71	8.3	1.16	18.7569	24.6117	64.50420054200542	3100	166	27.983	234.32	25	1.07	0.475	0	0	2.295	0.14	0	0	152	4.65625	0	2.41	0	4.2	0	629.73	13534	0	23.82	1	25.2376	2.295	0	1.24	2	0	14	-0.250106	6	3.69567
Hg	-6.815	-1.042	5.12515	-0.27968	2	2.23	14.09	78	1.71	8.3	1.16	18.7569	24.6117	64.50420054200542	3100	166	27.983	234.32	25	1.07	0.475	0	0	2.295	0.14	0	0	152	4.65625	0	2.41	0	4.2	0	629.73	13534	0	23.82	1	25.2376	2.295	0	1.24	2	0	14	-0.250106	6	3.69567
Hg	-6.815	-1.042	5.12515	-0.27968	2	2.23	14.09	78	1.71	8.3	1.16	18.7569	24.6117	64.50420054200542	3100	166	27.983	234.32	25	1.07	0.475	0	0	2.295	0.14	0	0	152	4.65625	0	2.41	0	4.2	0	629.73	13534	0	23.82	1	25.2376	2.295	0	1.24	2	0	14	-0.250106	6	3.69567
Hg	-6.815	-1.042	5.12515	-0.27968	1	2.23	14.09	78	1.71	8.3	1.33	10.4375	24.6117	64.50420054200542	3100	166	27.983	234.32	25	1.07	0.475	0	0	2.295	0.14	0	0	152	4.65625	0	2.41	0	4.2	0	629.73	13534	0	23.82	1	25.2376	2.295	0	1.24	2	0	14	-0.250106	6	3.69567
Hg	-6.815	-1.042	5.12515	-0.27968	2	2.23	14.09	78	1.71	8.3	1.16	18.7569	24.6117	64.50420054200542	3100	166	27.983	234.32	25	1.07	0.475	0	0	2.295	0.14	0	0	152	4.65625	0	2.41	0	4.2	0	629.73	13534	0	23.82	1	25.2376	2.295	0	1.24	2	0	14	-0.250106	6	3.69567
Hg	-6.815	-1.042	5.12515	-0.27968	1	2.23	14.09	78	1.71	8.3	1.33	10.4375	24.6117	64.50420054200542	3100	166	27.983	234.32	25	1.07	0.475	0	0	2.295	0.14	0	0	152	4.65625	0	2.41	0	4.2	0	629.73	13534	0	23.82	1	25.2376	2.295	0	1.24	2	0	14	-0.250106	6	3.69567
Hg	-6.815	-1.042	5.12515	-0.27968	2	2.23	14.09	78	1.71	8.3	1.16	18.7569	24.6117	64.50420054200542	3100	166	27.983	234.32	25	1.07	0.475	0	0	2.295	0.14	0	0	152	4.65625	0	2.41	0	4.2	0	629.73	13534	0	23.82	1	25.2376	2.295	0	1.24	2	0	14	-0.250106	6	3.69567
Hg	-6.815	-1.042	5.12515	-0.27968	2	2.23	14.09	78	1.71	8.3	1.16	18.7569	24.6117	64.50420054200542	3100	166	27.983	234.32	25	1.07	0.475	0	0	2.295	0.14	0	0	152	4.65625	0	2.41	0	4.2	0	629.73	13534	0	23.82	1	25.2376	2.295	0	1.24	2	0	14	-0.250106	6	3.69567
Hg	-6.815	-1.042	5.12515	-0.27968	2	2.23	14.09	78	1.71	8.3	1.16	18.7569	24.6117	64.50420054200542	3100	166	27.983	234.32	25	1.07	0.475	0	0	2.295	0.14	0	0	152	4.65625	0	2.41	0	4.2	0	629.73	13534	0	23.82	1	25.2376	2.295	0	1.24	2	0	14	-0.250106	6	3.69567
Hg	-6.815	-1.042	5.12515	-0.27968	2	2.23	14.09	78	1.71	8.3	1.16	18.7569	24.6117	64.50420054200542	3100	166	27.983	234.32	25	1.07	0.475	0	0	2.295	0.14	0	0	152	4.65625	0	2.41	0	4.2	0	629.73	13534	0	23.82	1	25.2376	2.295	0	1.24	2	0	14	-0.250106	6	3.69567
Hg	-6.815	-1.042	5.12515	-0.27968	2	2.23	14.09	78	1.71	8.3	1.16	18.7569	24.6117	64.50420054200542	3100	166	27.983	234.32	25	1.07	0.475	0	0	2.295	0.14	0	0	152	4.65625	0	2.41	0	4.2	0	629.73	13534	0	23.82	1	25.2376	2.295	0	1.24	2	0	14	-0.250106	6	3.69567
Hg	-6.815	-1.042	5.12515	-0.27968	1	2.23	14.09	78	1.71	8.3	1.33	10.4375	24.6117	64.50420054200542	3100	166	27.983	234.32	25	1.07	0.475	0	0	2.295	0.14	0	0	152	4.65625	0	2.41	0	4.2	0	629.73	13534	0	23.82	1	25.2376	2.295	0	1.24	2	0	14	-0.250106	6	3.69567
Hg	-6.815	-1.042	5.12515	-0.27968	2	2.23	14.09	78	1.71	8.3	1.16	18.7569	24.6117	64.50420054200542	3100	166	27.983	234.32	25	1.07	0.475	0	0	2.295	0.14	0	0	152	4.65625	0	2.41	0	4.2	0	629.73	13534	0	23.82	1	25.2376	2.295	0	1.24	2	0	14	-0.250106	6	3.69567
Hg	-6.815	-1.042	5.12515	-0.27968	2	2.23	14.09	78	1.71	8.3	1.16	18.7569	24.6117	64.50420054200542	3100	166	27.983	234.32	25	1.07	0.475	0	0	2.295	0.14	0	0	152	4.65625	0	2.41	0	4.2	0	629.73	13534	0	23.82	1	25.2376	2.295	0	1.24	2	0	14	-0.250106	6	3.69567
Hg	-6.815	-1.042	5.12515	-0.27968	1	2.23	14.09	78	1.71	8.3	1.33	10.4375	24.6117	64.50420054200542	3100	166	27.983	234.32	25	1.07	0.475	0	0	2.295	0.14	0	0	152	4.65625	0	2.41	0	4.2	0	629.73	13534	0	23.82	1	25.2376	2.295	0	1.24	2	0	14	-0.250106	6	3.69567
Hg	-6.815	-1.042	5.12515	-0.27968	2	2.23	14.09	78	1.71	8.3	1.16	18.7569	24.6117	64.50420054200542	3100	166	27.983	234.32	25	1.07	0.475	0	0	2.295	0.14	0	0	152	4.65625	0	2.41	0	4.2	0	629.73	13534	0	23.82	1	25.2376	2.295	0	1.24	2	0	14	-0.250106	6	3.69567
Hg	-6.815	-1.042	5.12515	-0.27968	2	2.23	14.09	78	1.71	8.3	1.16	18.7569	24.6117	64.50420054200542	3100	166	27.983	234.32	25	1.07	0.475	0	0	2.295	0.14	0	0	152	4.65625	0	2.41	0	4.2	0	629.73	13534	0	23.82	1	25.2376	2.295	0	1.24	2	0	14	-0.250106	6	3.69567
Hg	-6.815	-1.042	5.12515	-0.27968	1	2.23	14.09	78	1.71	8.3	1.33	10.4375	24.6117	64.50420054200542	3100	166	27.983	234.32	25	1.07	0.475	0	0	2.295	0.14	0	0	152	4.65625	0	2.41	0	4.2	0	629.73	13534	0	23.82	1	25.2376	2.295	0	1.24	2	0	14	-0.250106	6	3.69567
Hg	-6.815	-1.042	5.12515	-0.27968	2	2.23	14.09	78	1.71	8.3	1.16	18.7569	24.6117	64.50420054200542	3100	166	27.983	234.32	25	1.07	0.475	0	0	2.295	0.14	0	0	152	4.65625	0	2.41	0	4.2	0	629.73	13534	0	23.82	1	25.2376	2.295	0	1.24	2	0	14	-0.250106	6	3.69567
Hg	-6.815	-1.042	5.12515	-0.27968	2	2.23	14.09	78	1.71	8.3	1.16	18.7569	24.6117	64.50420054200542	3100	166	27.983	234.32	25	1.07	0.475	0	0	2.295	0.14	0	0	152	4.65625	0	2.41	0	4.2	0	629.73	13534	0	23.82	1	25.2376	2.295	0	1.24	2	0	14	-0.250106	6	3.69567
B	-3.606	-0.298	4.287	-6.6785	3	1.92	4.39	78	0.87	27	0.41	37.9306	7.29777	64.50420054200542	2000	166	11.087	2348	320	0.48	0.40748040455120105	1	5	50.2	1.026	0	26.7	88	3.06133	0	0.795	5	5.3	1.524	4273	2460	0	7.75	0	7.1725	50.2	0	1.75	2	0	0	-6.6777	2	2.42978
B	-3.606	-0.298	4.287	-6.6785	3	1.92	4.39	78	0.87	27	0.41	37.9306	7.29777	64.50420054200542	2000	166	11.087	2348	320	0.48	0.40748040455120105	1	5	50.2	1.026	0	26.7	88	3.06133	0	0.795	5	5.3	1.524	4273	2460	0	7.75	0	7.1725	50.2	0	1.75	2	0	0	-6.6777	2	2.42978
B	-3.606	-0.298	4.287	-6.6785	3	1.92	4.39	78	0.87	27	0.41	37.9306	7.29777	64.50420054200542	2000	166	11.087	2348	320	0.48	0.40748040455120105	1	5	50.2	1.026	0	26.7	88	3.06133	0	0.795	5	5.3	1.524	4273	2460	0	7.75	0	7.1725	50.2	0	1.75	2	0	0	-6.6777	2	2.42978
B	-3.606	-0.298	4.287	-6.6785	3	1.92	4.39	78	0.87	27	0.41	37.9306	7.29777	64.50420054200542	2000	166	11.087	2348	320	0.48	0.40748040455120105	1	5	50.2	1.026	0	26.7	88	3.06133	0	0.795	5	5.3	1.524	4273	2460	0	7.75	0	7.1725	50.2	0	1.75	2	0	0	-6.6777	2	2.42978
B	-3.606	-0.298	4.287	-6.6785	3	1.92	4.39	78	0.87	27	0.41	37.9306	7.29777	64.50420054200542	2000	166	11.087	2348	320	0.48	0.40748040455120105	1	5	50.2	1.026	0	26.7	88	3.06133	0	0.795	5	5.3	1.524	4273	2460	0	7.75	0	7.1725	50.2	0	1.75	2	0	0	-6.6777	2	2.42978
B	-3.606	-0.298	4.287	-6.6785	3	1.92	4.39	78	0.87	27	0.41	37.9306	7.29777	64.50420054200542	2000	166	11.087	2348	320	0.48	0.40748040455120105	1	5	50.2	1.026	0	26.7	88	3.06133	0	0.795	5	5.3	1.524	4273	2460	0	7.75	0	7.1725	50.2	0	1.75	2	0	0	-6.6777	2	2.42978
B	-3.606	-0.298	4.287	-6.6785	3	1.92	4.39	78	0.87	27	0.41	37.9306	7.29777	64.50420054200542	2000	166	11.087	2348	320	0.48	0.40748040455120105	1	5	50.2	1.026	0	26.7	88	3.06133	0	0.795	5	5.3	1.524	4273	2460	0	7.75	0	7.1725	50.2	0	1.75	2	0	0	-6.6777	2	2.42978
B	-3.606	-0.298	4.287	-6.6785	3	1.92	4.39	78	0.87	27	0.41	37.9306	7.29777	64.50420054200542	2000	166	11.087	2348	320	0.48	0.40748040455120105	1	5	50.2	1.026	0	26.7	88	3.06133	0	0.795	5	5.3	1.524	4273	2460	0	7.75	0	7.1725	50.2	0	1.75	2	0	0	-6.6777	2	2.42978
B	-3.606	-0.298	4.287	-6.6785	3	1.92	4.39	78	0.87	27	0.41	37.9306	7.29777	64.50420054200542	2000	166	11.087	2348	320	0.48	0.40748040455120105	1	5	50.2	1.026	0	26.7	88	3.06133	0	0.795	5	5.3	1.524	4273	2460	0	7.75	0	7.1725	50.2	0	1.75	2	0	0	-6.6777	2	2.42978
B	-3.606	-0.298	4.287	-6.6785	3	1.92	4.39	78	0.87	27	0.41	37.9306	7.29777	64.50420054200542	2000	166	11.087	2348	320	0.48	0.40748040455120105	1	5	50.2	1.026	0	26.7	88	3.06133	0	0.795	5	5.3	1.524	4273	2460	0	7.75	0	7.1725	50.2	0	1.75	2	0	0	-6.6777	2	2.42978
B	-3.606	-0.298	4.287	-6.6785	3	1.92	4.39	78	0.87	27	0.41	37.9306	7.29777	64.50420054200542	2000	166	11.087	2348	320	0.48	0.40748040455120105	1	5	50.2	1.026	0	26.7	88	3.06133	0	0.795	5	5.3	1.524	4273	2460	0	7.75	0	7.1725	50.2	0	1.75	2	0	0	-6.6777	2	2.42978
B	-3.606	-0.298	4.287	-6.6785	3	1.92	4.39	78	0.87	27	0.41	37.9306	7.29777	64.50420054200542	2000	166	11.087	2348	320	0.48	0.40748040455120105	1	5	50.2	1.026	0	26.7	88	3.06133	0	0.795	5	5.3	1.524	4273	2460	0	7.75	0	7.1725	50.2	0	1.75	2	0	0	-6.6777	2	2.42978
B	-3.606	-0.298	4.287	-6.6785	3	1.92	4.39	78	0.87	27	0.41	37.9306	7.29777	64.50420054200542	2000	166	11.087	2348	320	0.48	0.40748040455120105	1	5	50.2	1.026	0	26.7	88	3.06133	0	0.795	5	5.3	1.524	4273	2460	0	7.75	0	7.1725	50.2	0	1.75	2	0	0	-6.6777	2	2.42978
B	-3.606	-0.298	4.287	-6.6785	3	1.92	4.39	78	0.87	27	0.41	37.9306	7.29777	64.50420054200542	2000	166	11.087	2348	320	0.48	0.40748040455120105	1	5	50.2	1.026	0	26.7	88	3.06133	0	0.795	5	5.3	1.524	4273	2460	0	7.75	0	7.1725	50.2	0	1.75	2	0	0	-6.6777	2	2.42978
B	-3.606	-0.298	4.287	-6.6785	3	1.92	4.39	78	0.87	27	0.41	37.9306	7.29777	64.50420054200542	2000	166	11.087	2348	320	0.48	0.40748040455120105	1	5	50.2	1.026	0	26.7	88	3.06133	0	0.795	5	5.3	1.524	4273	2460	0	7.75	0	7.1725	50.2	0	1.75	2	0	0	-6.6777	2	2.42978
B	-3.606	-0.298	4.287	-6.6785	3	1.92	4.39	78	0.87	27	0.41	37.9306	7.29777	64.50420054200542	2000	166	11.087	2348	320	0.48	0.40748040455120105	1	5	50.2	1.026	0	26.7	88	3.06133	0	0.795	5	5.3	1.524	4273	2460	0	7.75	0	7.1725	50.2	0	1.75	2	0	0	-6.6777	2	2.42978
B	-3.606	-0.298	4.287	-6.6785	3	1.92	4.39	78	0.87	27	0.41	37.9306	7.29777	64.50420054200542	2000	166	11.087	2348	320	0.48	0.40748040455120105	1	5	50.2	1.026	0	26.7	88	3.06133	0	0.795	5	5.3	1.524	4273	2460	0	7.75	0	7.1725	50.2	0	1.75	2	0	0	-6.6777	2	2.42978
Al	-2.711	-0.444	3.22123	-3.7481	3	1.84	10	70	1.18	235	0.675	28.4476	16.5944	26	1000	225	24.2	933.47	76	0.77	0.40748040455120105	0	5	10.71	0.897	0	42.5	141	4.03961	0	1.675	5	4.2	0	2792	2700	0	16.61	0	16.48	10.71	0	1.39	2	0	0	-3.74542	3	3.20624
Al	-2.711	-0.444	3.22123	-3.7481	3	1.84	10	70	1.18	235	0.675	28.4476	16.5944	26	1000	225	24.2	933.47	76	0.77	0.40748040455120105	0	5	10.71	0.897	0	42.5	141	4.03961	0	1.675	5	4.2	0	2792	2700	0	16.61	0	16.48	10.71	0	1.39	2	0	0	-3.74542	3	3.20624
Al	-2.711	-0.444	3.22123	-3.7481	3	1.84	10	70	1.18	235	0.675	28.4476	16.5944	26	1000	225	24.2	933.47	76	0.77	0.40748040455120105	0	5	10.71	0.897	0	42.5	141	4.03961	0	1.675	5	4.2	0	2792	2700	0	16.61	0	16.48	10.71	0	1.39	2	0	0	-3.74542	3	3.20624
Al	-2.711	-0.444	3.22123	-3.7481	3	1.84	10	70	1.18	235	0.675	28.4476	16.5944	26	1000	225	24.2	933.47	76	0.77	0.40748040455120105	0	5	10.71	0.897	0	42.5	141	4.03961	0	1.675	5	4.2	0	2792	2700	0	16.61	0	16.48	10.71	0	1.39	2	0	0	-3.74542	3	3.20624
Al	-2.711	-0.444	3.22123	-3.7481	3	1.84	10	70	1.18	235	0.675	28.4476	16.5944	26	1000	225	24.2	933.47	76	0.77	0.40748040455120105	0	5	10.71	0.897	0	42.5	141	4.03961	0	1.675	5	4.2	0	2792	2700	0	16.61	0	16.48	10.71	0	1.39	2	0	0	-3.74542	3	3.20624
Al	-2.711	-0.444	3.22123	-3.7481	3	1.84	10	70	1.18	235	0.675	28.4476	16.5944	26	1000	225	24.2	933.47	76	0.77	0.40748040455120105	0	5	10.71	0.897	0	42.5	141	4.03961	0	1.675	5	4.2	0	2792	2700	0	16.61	0	16.48	10.71	0	1.39	2	0	0	-3.74542	3	3.20624
Al	-2.711	-0.444	3.22123	-3.7481	3	1.84	10	70	1.18	235	0.675	28.4476	16.5944	26	1000	225	24.2	933.47	76	0.77	0.40748040455120105	0	5	10.71	0.897	0	42.5	141	4.03961	0	1.675	5	4.2	0	2792	2700	0	16.61	0	16.48	10.71	0	1.39	2	0	0	-3.74542	3	3.20624
Al	-2.711	-0.444	3.22123	-3.7481	3	1.84	10	70	1.18	235	0.675	28.4476	16.5944	26	1000	225	24.2	933.47	76	0.77	0.40748040455120105	0	5	10.71	0.897	0	42.5	141	4.03961	0	1.675	5	4.2	0	2792	2700	0	16.61	0	16.48	10.71	0	1.39	2	0	0	-3.74542	3	3.20624
Al	-2.711	-0.444	3.22123	-3.7481	3	1.84	10	70	1.18	235	0.675	28.4476	16.5944	26	1000	225	24.2	933.47	76	0.77	0.40748040455120105	0	5	10.71	0.897	0	42.5	141	4.03961	0	1.675	5	4.2	0	2792	2700	0	16.61	0	16.48	10.71	0	1.39	2	0	0	-3.74542	3	3.20624
Al	-2.711	-0.444	3.22123	-3.7481	3	1.84	10	70	1.18	235	0.675	28.4476	16.5944	26	1000	225	24.2	933.47	76	0.77	0.40748040455120105	0	5	10.71	0.897	0	42.5	141	4.03961	0	1.675	5	4.2	0	2792	2700	0	16.61	0	16.48	10.71	0	1.39	2	0	0	-3.74542	3	3.20624
Al	-2.711	-0.444	3.22123	-3.7481	3	1.84	10	70	1.18	235	0.675	28.4476	16.5944	26	1000	225	24.2	933.47	76	0.77	0.40748040455120105	0	5	10.71	0.897	0	42.5	141	4.03961	0	1.675	5	4.2	0	2792	2700	0	16.61	0	16.48	10.71	0	1.39	2	0	0	-3.74542	3	3.20624
Al	-2.711	-0.444	3.22123	-3.7481	3	1.84	10	70	1.18	235	0.675	28.4476	16.5944	26	1000	225	24.2	933.47	76	0.77	0.40748040455120105	0	5	10.71	0.897	0	42.5	141	4.03961	0	1.675	5	4.2	0	2792	2700	0	16.61	0	16.48	10.71	0	1.39	2	0	0	-3.74542	3	3.20624
Al	-2.711	-0.444	3.22123	-3.7481	3	1.84	10	70	1.18	235	0.675	28.4476	16.5944	26	1000	225	24.2	933.47	76	0.77	0.40748040455120105	0	5	10.71	0.897	0	42.5	141	4.03961	0	1.675	5	4.2	0	2792	2700	0	16.61	0	16.48	10.71	0	1.39	2	0	0	-3.74542	3	3.20624
Al	-2.711	-0.444	3.22123	-3.7481	3	1.84	10	70	1.18	235	0.675	28.4476	16.5944	26	1000	225	24.2	933.47	76	0.77	0.40748040455120105	0	5	10.71	0.897	0	42.5	141	4.03961	0	1.675	5	4.2	0	2792	2700	0	16.61	0	16.48	10.71	0	1.39	2	0	0	-3.74542	3	3.20624
Al	-2.711	-0.444	3.22123	-3.7481	3	1.84	10	70	1.18	235	0.675	28.4476	16.5944	26	1000	225	24.2	933.47	76	0.77	0.40748040455120105	0	5	10.71	0.897	0	42.5	141	4.03961	0	1.675	5	4.2	0	2792	2700	0	16.61	0	16.48	10.71	0	1.39	2	0	0	-3.74542	3	3.20624
Al	-2.711	-0.444	3.22123	-3.7481	3	1.84	10	70	1.18	235	0.675	28.4476	16.5944	26	1000	225	24.2	933.47	76	0.77	0.40748040455120105	0	5	10.71	0.897	0	42.5	141	4.03961	0	1.675	5	4.2	0	2792	2700	0	16.61	0	16.48	10.71	0	1.39	2	0	0	-3.74542	3	3.20624
Al	-2.711	-0.444	3.22123	-3.7481	3	1.84	10	70	1.18	235	0.675	28.4476	16.5944	26	1000	225	24.2	933.47	76	0.77	0.40748040455120105	0	5	10.71	0.897	0	42.5	141	4.03961	0	1.675	5	4.2	0	2792	2700	0	16.61	0	16.48	10.71	0	1.39	2	0	0	-3.74542	3	3.20624
Al	-2.711	-0.444	3.22123	-3.7481	3	1.84	10	70	1.18	235	0.675	28.4476	16.5944	26	1000	225	24.2	933.47	76	0.77	0.40748040455120105	0	5	10.71	0.897	0	42.5	141	4.03961	0	1.675	5	4.2	0	2792	2700	0	16.61	0	16.48	10.71	0	1.39	2	0	0	-3.74542	3	3.20624
Ga	-2.577	-0.493	3.15489	-3.03723	3	1.87	11.8	78	1.36	29	0.76	30.7258	19.6105	64.50420054200542	1900	64	26.03	302.91	129.03490683229813	0.76	0.17	0	5	5.585	0.373	0	28.9	134	4.22521	0	1.695	5	4.1	0	2477	5904	0	19.6	0	18.8575	5.585	0	1.31	2	0	0	-3.01226	4	3.35355
Ga	-2.577	-0.493	3.15489	-3.03723	3	1.87	11.8	78	1.36	29	0.76	30.7258	19.6105	64.50420054200542	1900	64	26.03	302.91	129.03490683229813	0.76	0.17	0	5	5.585	0.373	0	28.9	134	4.22521	0	1.695	5	4.1	0	2477	5904	0	19.6	0	18.8575	5.585	0	1.31	2	0	0	-3.01226	4	3.35355
Ga	-2.577	-0.493	3.15489	-3.03723	3	1.87	11.8	78	1.36	29	0.76	30.7258	19.6105	64.50420054200542	1900	64	26.03	302.91	129.03490683229813	0.76	0.17	0	5	5.585	0.373	0	28.9	134	4.22521	0	1.695	5	4.1	0	2477	5904	0	19.6	0	18.8575	5.585	0	1.31	2	0	0	-3.01226	4	3.35355
Ga	-2.577	-0.493	3.15489	-3.03723	3	1.87	11.8	78	1.36	29	0.76	30.7258	19.6105	64.50420054200542	1900	64	26.03	302.91	129.03490683229813	0.76	0.17	0	5	5.585	0.373	0	28.9	134	4.22521	0	1.695	5	4.1	0	2477	5904	0	19.6	0	18.8575	5.585	0	1.31	2	0	0	-3.01226	4	3.35355
Ga	-2.577	-0.493	3.15489	-3.03723	3	1.87	11.8	78	1.36	29	0.76	30.7258	19.6105	64.50420054200542	1900	64	26.03	302.91	129.03490683229813	0.76	0.17	0	5	5.585	0.373	0	28.9	134	4.22521	0	1.695	5	4.1	0	2477	5904	0	19.6	0	18.8575	5.585	0	1.31	2	0	0	-3.01226	4	3.35355
Ga	-2.577	-0.493	3.15489	-3.03723	3	1.87	11.8	78	1.36	29	0.76	30.7258	19.6105	64.50420054200542	1900	64	26.03	302.91	129.03490683229813	0.76	0.17	0	5	5.585	0.373	0	28.9	134	4.22521	0	1.695	5	4.1	0	2477	5904	0	19.6	0	18.8575	5.585	0	1.31	2	0	0	-3.01226	4	3.35355
Ga	-2.577	-0.493	3.15489	-3.03723	3	1.87	11.8	78	1.36	29	0.76	30.7258	19.6105	64.50420054200542	1900	64	26.03	302.91	129.03490683229813	0.76	0.17	0	5	5.585	0.373	0	28.9	134	4.22521	0	1.695	5	4.1	0	2477	5904	0	19.6	0	18.8575	5.585	0	1.31	2	0	0	-3.01226	4	3.35355
Ga	-2.577	-0.493	3.15489	-3.03723	3	1.87	11.8	78	1.36	29	0.76	30.7258	19.6105	64.50420054200542	1900	64	26.03	302.91	129.03490683229813	0.76	0.17	0	5	5.585	0.373	0	28.9	134	4.22521	0	1.695	5	4.1	0	2477	5904	0	19.6	0	18.8575	5.585	0	1.31	2	0	0	-3.01226	4	3.35355
Ga	-2.577	-0.493	3.15489	-3.03723	3	1.87	11.8	78	1.36	29	0.76	30.7258	19.6105	64.50420054200542	1900	64	26.03	302.91	129.03490683229813	0.76	0.17	0	5	5.585	0.373	0	28.9	134	4.22521	0	1.695	5	4.1	0	2477	5904	0	19.6	0	18.8575	5.585	0	1.31	2	0	0	-3.01226	4	3.35355
Ga	-2.577	-0.493	3.15489	-3.03723	3	1.87	11.8	78	1.36	29	0.76	30.7258	19.6105	64.50420054200542	1900	64	26.03	302.91	129.03490683229813	0.76	0.17	0	5	5.585	0.373	0	28.9	134	4.22521	0	1.695	5	4.1	0	2477	5904	0	19.6	0	18.8575	5.585	0	1.31	2	0	0	-3.01226	4	3.35355
Ga	-2.577	-0.493	3.15489	-3.03723	3	1.87	11.8	78	1.36	29	0.76	30.7258	19.6105	64.50420054200542	1900	64	26.03	302.91	129.03490683229813	0.76	0.17	0	5	5.585	0.373	0	28.9	134	4.22521	0	1.695	5	4.1	0	2477	5904	0	19.6	0	18.8575	5.585	0	1.31	2	0	0	-3.01226	4	3.35355
Ga	-2.577	-0.493	3.15489	-3.03723	3	1.87	11.8	78	1.36	29	0.76	30.7258	19.6105	64.50420054200542	1900	64	26.03	302.91	129.03490683229813	0.76	0.17	0	5	5.585	0.373	0	28.9	134	4.22521	0	1.695	5	4.1	0	2477	5904	0	19.6	0	18.8575	5.585	0	1.31	2	0	0	-3.01226	4	3.35355
Ga	-2.577	-0.493	3.15489	-3.03723	3	1.87	11.8	78	1.36	29	0.76	30.7258	19.6105	64.50420054200542	1900	64	26.03	302.91	129.03490683229813	0.76	0.17	0	5	5.585	0.373	0	28.9	134	4.22521	0	1.695	5	4.1	0	2477	5904	0	19.6	0	18.8575	5.585	0	1.31	2	0	0	-3.01226	4	3.35355
Ga	-2.577	-0.493	3.15489	-3.03723	3	1.87	11.8	78	1.36	29	0.76	30.7258	19.6105	64.50420054200542	1900	64	26.03	302.91	129.03490683229813	0.76	0.17	0	5	5.585	0.373	0	28.9	134	4.22521	0	1.695	5	4.1	0	2477	5904	0	19.6	0	18.8575	5.585	0	1.31	2	0	0	-3.01226	4	3.35355
Ga	-2.577	-0.493	3.15489	-3.03723	3	1.87	11.8	78	1.36	29	0.76	30.7258	19.6105	64.50420054200542	1900	64	26.03	302.91	129.03490683229813	0.76	0.17	0	5	5.585	0.373	0	28.9	134	4.22521	0	1.695	5	4.1	0	2477	5904	0	19.6	0	18.8575	5.585	0	1.31	2	0	0	-3.01226	4	3.35355
Ga	-2.577	-0.493	3.15489	-3.03723	3	1.87	11.8	78	1.36	29	0.76	30.7258	19.6105	64.50420054200542	1900	64	26.03	302.91	129.03490683229813	0.76	0.17	0	5	5.585	0.373	0	28.9	134	4.22521	0	1.695	5	4.1	0	2477	5904	0	19.6	0	18.8575	5.585	0	1.31	2	0	0	-3.01226	4	3.35355
Ga	-2.577	-0.493	3.15489	-3.03723	3	1.87	11.8	78	1.36	29	0.76	30.7258	19.6105	64.50420054200542	1900	64	26.03	302.91	129.03490683229813	0.76	0.17	0	5	5.585	0.373	0	28.9	134	4.22521	0	1.695	5	4.1	0	2477	5904	0	19.6	0	18.8575	5.585	0	1.31	2	0	0	-3.01226	4	3.35355
Ga	-2.577	-0.493	3.15489	-3.03723	3	1.87	11.8	78	1.36	29	0.76	30.7258	19.6105	64.50420054200542	1900	64	26.03	302.91	129.03490683229813	0.76	0.17	0	5	5.585	0.373	0	28.9	134	4.22521	0	1.695	5	4.1	0	2477	5904	0	19.6	0	18.8575	5.585	0	1.31	2	0	0	-3.01226	4	3.35355
In	-2.516	-0.492	3.04866	-2.72488	3	1.93	15.76	11	1.56	82	0.94	28.0441	26.0827	64.50420054200542	2000	139	26.74	429.75	129.03490683229813	0.94	0.36	0	5	3.291	0.233	0	28.9	155	4.59533	0	2.05	5	3.9	0	2345	7310	0	26.14	0	24.26	3.291	0	1.17	2	0	0	-2.6668	5	3.64732
In	-2.516	-0.492	3.04866	-2.72488	3	1.93	15.76	11	1.56	82	0.94	28.0441	26.0827	64.50420054200542	2000	139	26.74	429.75	129.03490683229813	0.94	0.36	0	5	3.291	0.233	0	28.9	155	4.59533	0	2.05	5	3.9	0	2345	7310	0	26.14	0	24.26	3.291	0	1.17	2	0	0	-2.6668	5	3.64732
In	-2.516	-0.492	3.04866	-2.72488	3	1.93	15.76	11	1.56	82	0.94	28.0441	26.0827	64.50420054200542	2000	139	26.74	429.75	129.03490683229813	0.94	0.36	0	5	3.291	0.233	0	28.9	155	4.59533	0	2.05	5	3.9	0	2345	7310	0	26.14	0	24.26	3.291	0	1.17	2	0	0	-2.6668	5	3.64732
In	-2.516	-0.492	3.04866	-2.72488	3	1.93	15.76	11	1.56	82	0.94	28.0441	26.0827	64.50420054200542	2000	139	26.74	429.75	129.03490683229813	0.94	0.36	0	5	3.291	0.233	0	28.9	155	4.59533	0	2.05	5	3.9	0	2345	7310	0	26.14	0	24.26	3.291	0	1.17	2	0	0	-2.6668	5	3.64732
In	-2.516	-0.492	3.04866	-2.72488	3	1.93	15.76	11	1.56	82	0.94	28.0441	26.0827	64.50420054200542	2000	139	26.74	429.75	129.03490683229813	0.94	0.36	0	5	3.291	0.233	0	28.9	155	4.59533	0	2.05	5	3.9	0	2345	7310	0	26.14	0	24.26	3.291	0	1.17	2	0	0	-2.6668	5	3.64732
In	-2.516	-0.492	3.04866	-2.72488	3	1.93	15.76	11	1.56	82	0.94	28.0441	26.0827	64.50420054200542	2000	139	26.74	429.75	129.03490683229813	0.94	0.36	0	5	3.291	0.233	0	28.9	155	4.59533	0	2.05	5	3.9	0	2345	7310	0	26.14	0	24.26	3.291	0	1.17	2	0	0	-2.6668	5	3.64732
In	-2.516	-0.492	3.04866	-2.72488	3	1.93	15.76	11	1.56	82	0.94	28.0441	26.0827	64.50420054200542	2000	139	26.74	429.75	129.03490683229813	0.94	0.36	0	5	3.291	0.233	0	28.9	155	4.59533	0	2.05	5	3.9	0	2345	7310	0	26.14	0	24.26	3.291	0	1.17	2	0	0	-2.6668	5	3.64732
In	-2.516	-0.492	3.04866	-2.72488	3	1.93	15.76	11	1.56	82	0.94	28.0441	26.0827	64.50420054200542	2000	139	26.74	429.75	129.03490683229813	0.94	0.36	0	5	3.291	0.233	0	28.9	155	4.59533	0	2.05	5	3.9	0	2345	7310	0	26.14	0	24.26	3.291	0	1.17	2	0	0	-2.6668	5	3.64732
In	-2.516	-0.492	3.04866	-2.72488	3	1.93	15.76	11	1.56	82	0.94	28.0441	26.0827	64.50420054200542	2000	139	26.74	429.75	129.03490683229813	0.94	0.36	0	5	3.291	0.233	0	28.9	155	4.59533	0	2.05	5	3.9	0	2345	7310	0	26.14	0	24.26	3.291	0	1.17	2	0	0	-2.6668	5	3.64732
In	-2.516	-0.492	3.04866	-2.72488	3	1.93	15.76	11	1.56	82	0.94	28.0441	26.0827	64.50420054200542	2000	139	26.74	429.75	129.03490683229813	0.94	0.36	0	5	3.291	0.233	0	28.9	155	4.59533	0	2.05	5	3.9	0	2345	7310	0	26.14	0	24.26	3.291	0	1.17	2	0	0	-2.6668	5	3.64732
In	-2.516	-0.492	3.04866	-2.72488	3	1.93	15.76	11	1.56	82	0.94	28.0441	26.0827	64.50420054200542	2000	139	26.74	429.75	129.03490683229813	0.94	0.36	0	5	3.291	0.233	0	28.9	155	4.59533	0	2.05	5	3.9	0	2345	7310	0	26.14	0	24.26	3.291	0	1.17	2	0	0	-2.6668	5	3.64732
In	-2.516	-0.492	3.04866	-2.72488	3	1.93	15.76	11	1.56	82	0.94	28.0441	26.0827	64.50420054200542	2000	139	26.74	429.75	129.03490683229813	0.94	0.36	0	5	3.291	0.233	0	28.9	155	4.59533	0	2.05	5	3.9	0	2345	7310	0	26.14	0	24.26	3.291	0	1.17	2	0	0	-2.6668	5	3.64732
In	-2.516	-0.492	3.04866	-2.72488	3	1.93	15.76	11	1.56	82	0.94	28.0441	26.0827	64.50420054200542	2000	139	26.74	429.75	129.03490683229813	0.94	0.36	0	5	3.291	0.233	0	28.9	155	4.59533	0	2.05	5	3.9	0	2345	7310	0	26.14	0	24.26	3.291	0	1.17	2	0	0	-2.6668	5	3.64732
In	-2.516	-0.492	3.04866	-2.72488	3	1.93	15.76	11	1.56	82	0.94	28.0441	26.0827	64.50420054200542	2000	139	26.74	429.75	129.03490683229813	0.94	0.36	0	5	3.291	0.233	0	28.9	155	4.59533	0	2.05	5	3.9	0	2345	7310	0	26.14	0	24.26	3.291	0	1.17	2	0	0	-2.6668	5	3.64732
In	-2.516	-0.492	3.04866	-2.72488	3	1.93	15.76	11	1.56	82	0.94	28.0441	26.0827	64.50420054200542	2000	139	26.74	429.75	129.03490683229813	0.94	0.36	0	5	3.291	0.233	0	28.9	155	4.59533	0	2.05	5	3.9	0	2345	7310	0	26.14	0	24.26	3.291	0	1.17	2	0	0	-2.6668	5	3.64732
In	-2.516	-0.492	3.04866	-2.72488	3	1.93	15.76	11	1.56	82	0.94	28.0441	26.0827	64.50420054200542	2000	139	26.74	429.75	129.03490683229813	0.94	0.36	0	5	3.291	0.233	0	28.9	155	4.59533	0	2.05	5	3.9	0	2345	7310	0	26.14	0	24.26	3.291	0	1.17	2	0	0	-2.6668	5	3.64732
In	-2.516	-0.492	3.04866	-2.72488	3	1.93	15.76	11	1.56	82	0.94	28.0441	26.0827	64.50420054200542	2000	139	26.74	429.75	129.03490683229813	0.94	0.36	0	5	3.291	0.233	0	28.9	155	4.59533	0	2.05	5	3.9	0	2345	7310	0	26.14	0	24.26	3.291	0	1.17	2	0	0	-2.6668	5	3.64732
In	-2.516	-0.492	3.04866	-2.72488	3	1.93	15.76	11	1.56	82	0.94	28.0441	26.0827	64.50420054200542	2000	139	26.74	429.75	129.03490683229813	0.94	0.36	0	5	3.291	0.233	0	28.9	155	4.59533	0	2.05	5	3.9	0	2345	7310	0	26.14	0	24.26	3.291	0	1.17	2	0	0	-2.6668	5	3.64732
Tl	-2.367	-0.561	3.15749	-2.36721	3	1.96	17.22	8	1.56	46	1.025	29.852	28.6409	2.8	6500	194	26.32	577	43	1.015	0.463	0	5	4.142	0.129	0	19.2	172	4.75691	0	2.235	5	3.9	0	1746	11850	0	28.53	0	26.91	4.142	0	1.12	2	0	14	-2.27268	6	3.77556
Tl	-2.367	-0.561	3.15749	-2.36721	3	1.96	17.22	8	1.56	46	1.025	29.852	28.6409	2.8	6500	194	26.32	577	43	1.015	0.463	0	5	4.142	0.129	0	19.2	172	4.75691	0	2.235	5	3.9	0	1746	11850	0	28.53	0	26.91	4.142	0	1.12	2	0	14	-2.27268	6	3.77556
Tl	-2.367	-0.561	3.15749	-2.36721	3	1.96	17.22	8	1.56	46	1.025	29.852	28.6409	2.8	6500	194	26.32	577	43	1.015	0.463	0	5	4.142	0.129	0	19.2	172	4.75691	0	2.235	5	3.9	0	1746	11850	0	28.53	0	26.91	4.142	0	1.12	2	0	14	-2.27268	6	3.77556
Tl	-2.367	-0.561	3.15749	-2.36721	3	1.96	17.22	8	1.56	46	1.025	29.852	28.6409	2.8	6500	194	26.32	577	43	1.015	0.463	0	5	4.142	0.129	0	19.2	172	4.75691	0	2.235	5	3.9	0	1746	11850	0	28.53	0	26.91	4.142	0	1.12	2	0	14	-2.27268	6	3.77556
Tl	-2.367	-0.561	3.15749	-2.36721	3	1.96	17.22	8	1.56	46	1.025	29.852	28.6409	2.8	6500	194	26.32	577	43	1.015	0.463	0	5	4.142	0.129	0	19.2	172	4.75691	0	2.235	5	3.9	0	1746	11850	0	28.53	0	26.91	4.142	0	1.12	2	0	14	-2.27268	6	3.77556
Tl	-2.367	-0.561	3.15749	-2.36721	3	1.96	17.22	8	1.56	46	1.025	29.852	28.6409	2.8	6500	194	26.32	577	43	1.015	0.463	0	5	4.142	0.129	0	19.2	172	4.75691	0	2.235	5	3.9	0	1746	11850	0	28.53	0	26.91	4.142	0	1.12	2	0	14	-2.27268	6	3.77556
Tl	-2.367	-0.561	3.15749	-2.36721	3	1.96	17.22	8	1.56	46	1.025	29.852	28.6409	2.8	6500	194	26.32	577	43	1.015	0.463	0	5	4.142	0.129	0	19.2	172	4.75691	0	2.235	5	3.9	0	1746	11850	0	28.53	0	26.91	4.142	0	1.12	2	0	14	-2.27268	6	3.77556
Tl	-2.367	-0.561	3.15749	-2.36721	3	1.96	17.22	8	1.56	46	1.025	29.852	28.6409	2.8	6500	194	26.32	577	43	1.015	0.463	0	5	4.142	0.129	0	19.2	172	4.75691	0	2.235	5	3.9	0	1746	11850	0	28.53	0	26.91	4.142	0	1.12	2	0	14	-2.27268	6	3.77556
Tl	-2.367	-0.561	3.15749	-2.36721	3	1.96	17.22	8	1.56	46	1.025	29.852	28.6409	2.8	6500	194	26.32	577	43	1.015	0.463	0	5	4.142	0.129	0	19.2	172	4.75691	0	2.235	5	3.9	0	1746	11850	0	28.53	0	26.91	4.142	0	1.12	2	0	14	-2.27268	6	3.77556
Tl	-2.367	-0.561	3.15749	-2.36721	3	1.96	17.22	8	1.56	46	1.025	29.852	28.6409	2.8	6500	194	26.32	577	43	1.015	0.463	0	5	4.142	0.129	0	19.2	172	4.75691	0	2.235	5	3.9	0	1746	11850	0	28.53	0	26.91	4.142	0	1.12	2	0	14	-2.27268	6	3.77556
Tl	-2.367	-0.561	3.15749	-2.36721	3	1.96	17.22	8	1.56	46	1.025	29.852	28.6409	2.8	6500	194	26.32	577	43	1.015	0.463	0	5	4.142	0.129	0	19.2	172	4.75691	0	2.235	5	3.9	0	1746	11850	0	28.53	0	26.91	4.142	0	1.12	2	0	14	-2.27268	6	3.77556
Tl	-2.367	-0.561	3.15749	-2.36721	1	1.96	17.22	8	1.56	46	1.64	6.10829	28.6409	2.8	6500	194	26.32	577	43	1.015	0.463	0	5	4.142	0.129	0	19.2	172	4.75691	0	2.235	5	3.9	0	1746	11850	0	28.53	0	26.91	4.142	0	1.12	2	0	14	-2.27268	6	3.77556
Tl	-2.367	-0.561	3.15749	-2.36721	3	1.96	17.22	8	1.56	46	1.025	29.852	28.6409	2.8	6500	194	26.32	577	43	1.015	0.463	0	5	4.142	0.129	0	19.2	172	4.75691	0	2.235	5	3.9	0	1746	11850	0	28.53	0	26.91	4.142	0	1.12	2	0	14	-2.27268	6	3.77556
Tl	-2.367	-0.561	3.15749	-2.36721	3	1.96	17.22	8	1.56	46	1.025	29.852	28.6409	2.8	6500	194	26.32	577	43	1.015	0.463	0	5	4.142	0.129	0	19.2	172	4.75691	0	2.235	5	3.9	0	1746	11850	0	28.53	0	26.91	4.142	0	1.12	2	0	14	-2.27268	6	3.77556
Tl	-2.367	-0.561	3.15749	-2.36721	3	1.96	17.22	8	1.56	46	1.025	29.852	28.6409	2.8	6500	194	26.32	577	43	1.015	0.463	0	5	4.142	0.129	0	19.2	172	4.75691	0	2.235	5	3.9	0	1746	11850	0	28.53	0	26.91	4.142	0	1.12	2	0	14	-2.27268	6	3.77556
Tl	-2.367	-0.561	3.15749	-2.36721	1	1.96	17.22	8	1.56	46	1.64	6.10829	28.6409	2.8	6500	194	26.32	577	43	1.015	0.463	0	5	4.142	0.129	0	19.2	172	4.75691	0	2.235	5	3.9	0	1746	11850	0	28.53	0	26.91	4.142	0	1.12	2	0	14	-2.27268	6	3.77556
Tl	-2.367	-0.561	3.15749	-2.36721	1	1.96	17.22	8	1.56	46	1.64	6.10829	28.6409	2.8	6500	194	26.32	577	43	1.015	0.463	0	5	4.142	0.129	0	19.2	172	4.75691	0	2.235	5	3.9	0	1746	11850	0	28.53	0	26.91	4.142	0	1.12	2	0	14	-2.27268	6	3.77556
Tl	-2.367	-0.561	3.15749	-2.36721	3	1.96	17.22	8	1.56	46	1.025	29.852	28.6409	2.8	6500	194	26.32	577	43	1.015	0.463	0	5	4.142	0.129	0	19.2	172	4.75691	0	2.235	5	3.9	0	1746	11850	0	28.53	0	26.91	4.142	0	1.12	2	0	14	-2.27268	6	3.77556
Si	-4.081	-0.462	4.76681	-5.4254	4	2.1	12.06	47	1.11	150	0.54	45.1418	20.0164	64.50420054200542	1000	227	19.99	1687	100	0.68	0.40748040455120105	1	4	50.21	0.712	0	133.6	110	4.34024	0	1.42	4	4.7	0.773	3173	2330	0	20.02	0	20.44	50.21	0	1.5	2	0	0	-5.42492	3	3.44485
Si	-4.081	-0.462	4.76681	-5.4254	4	2.1	12.06	47	1.11	150	0.54	45.1418	20.0164	64.50420054200542	1000	227	19.99	1687	100	0.68	0.40748040455120105	1	4	50.21	0.712	0	133.6	110	4.34024	0	1.42	4	4.7	0.773	3173	2330	0	20.02	0	20.44	50.21	0	1.5	2	0	0	-5.42492	3	3.44485
Si	-4.081	-0.462	4.76681	-5.4254	4	2.1	12.06	47	1.11	150	0.54	45.1418	20.0164	64.50420054200542	1000	227	19.99	1687	100	0.68	0.40748040455120105	1	4	50.21	0.712	0	133.6	110	4.34024	0	1.42	4	4.7	0.773	3173	2330	0	20.02	0	20.44	50.21	0	1.5	2	0	0	-5.42492	3	3.44485
Si	-4.081	-0.462	4.76681	-5.4254	4	2.1	12.06	47	1.11	150	0.54	45.1418	20.0164	64.50420054200542	1000	227	19.99	1687	100	0.68	0.40748040455120105	1	4	50.21	0.712	0	133.6	110	4.34024	0	1.42	4	4.7	0.773	3173	2330	0	20.02	0	20.44	50.21	0	1.5	2	0	0	-5.42492	3	3.44485
Si	-4.081	-0.462	4.76681	-5.4254	4	2.1	12.06	47	1.11	150	0.54	45.1418	20.0164	64.50420054200542	1000	227	19.99	1687	100	0.68	0.40748040455120105	1	4	50.21	0.712	0	133.6	110	4.34024	0	1.42	4	4.7	0.773	3173	2330	0	20.02	0	20.44	50.21	0	1.5	2	0	0	-5.42492	3	3.44485
Si	-4.081	-0.462	4.76681	-5.4254	4	2.1	12.06	47	1.11	150	0.54	45.1418	20.0164	64.50420054200542	1000	227	19.99	1687	100	0.68	0.40748040455120105	1	4	50.21	0.712	0	133.6	110	4.34024	0	1.42	4	4.7	0.773	3173	2330	0	20.02	0	20.44	50.21	0	1.5	2	0	0	-5.42492	3	3.44485
Si	-4.081	-0.462	4.76681	-5.4254	4	2.1	12.06	47	1.11	150	0.54	45.1418	20.0164	64.50420054200542	1000	227	19.99	1687	100	0.68	0.40748040455120105	1	4	50.21	0.712	0	133.6	110	4.34024	0	1.42	4	4.7	0.773	3173	2330	0	20.02	0	20.44	50.21	0	1.5	2	0	0	-5.42492	3	3.44485
Si	-4.081	-0.462	4.76681	-5.4254	4	2.1	12.06	47	1.11	150	0.54	45.1418	20.0164	64.50420054200542	1000	227	19.99	1687	100	0.68	0.40748040455120105	1	4	50.21	0.712	0	133.6	110	4.34024	0	1.42	4	4.7	0.773	3173	2330	0	20.02	0	20.44	50.21	0	1.5	2	0	0	-5.42492	3	3.44485
Si	-4.081	-0.462	4.76681	-5.4254	4	2.1	12.06	47	1.11	150	0.54	45.1418	20.0164	64.50420054200542	1000	227	19.99	1687	100	0.68	0.40748040455120105	1	4	50.21	0.712	0	133.6	110	4.34024	0	1.42	4	4.7	0.773	3173	2330	0	20.02	0	20.44	50.21	0	1.5	2	0	0	-5.42492	3	3.44485
Si	-4.081	-0.462	4.76681	-5.4254	4	2.1	12.06	47	1.11	150	0.54	45.1418	20.0164	64.50420054200542	1000	227	19.99	1687	100	0.68	0.40748040455120105	1	4	50.21	0.712	0	133.6	110	4.34024	0	1.42	4	4.7	0.773	3173	2330	0	20.02	0	20.44	50.21	0	1.5	2	0	0	-5.42492	3	3.44485
Si	-4.081	-0.462	4.76681	-5.4254	4	2.1	12.06	47	1.11	150	0.54	45.1418	20.0164	64.50420054200542	1000	227	19.99	1687	100	0.68	0.40748040455120105	1	4	50.21	0.712	0	133.6	110	4.34024	0	1.42	4	4.7	0.773	3173	2330	0	20.02	0	20.44	50.21	0	1.5	2	0	0	-5.42492	3	3.44485
Si	-4.081	-0.462	4.76681	-5.4254	4	2.1	12.06	47	1.11	150	0.54	45.1418	20.0164	64.50420054200542	1000	227	19.99	1687	100	0.68	0.40748040455120105	1	4	50.21	0.712	0	133.6	110	4.34024	0	1.42	4	4.7	0.773	3173	2330	0	20.02	0	20.44	50.21	0	1.5	2	0	0	-5.42492	3	3.44485
Si	-4.081	-0.462	4.76681	-5.4254	4	2.1	12.06	47	1.11	150	0.54	45.1418	20.0164	64.50420054200542	1000	227	19.99	1687	100	0.68	0.40748040455120105	1	4	50.21	0.712	0	133.6	110	4.34024	0	1.42	4	4.7	0.773	3173	2330	0	20.02	0	20.44	50.21	0	1.5	2	0	0	-5.42492	3	3.44485
Si	-4.081	-0.462	4.76681	-5.4254	4	2.1	12.06	47	1.11	150	0.54	45.1418	20.0164	64.50420054200542	1000	227	19.99	1687	100	0.68	0.40748040455120105	1	4	50.21	0.712	0	133.6	110	4.34024	0	1.42	4	4.7	0.773	3173	2330	0	20.02	0	20.44	50.21	0	1.5	2	0	0	-5.42492	3	3.44485
Si	-4.081	-0.462	4.76681	-5.4254	4	2.1	12.06	47	1.11	150	0.54	45.1418	20.0164	64.50420054200542	1000	227	19.99	1687	100	0.68	0.40748040455120105	1	4	50.21	0.712	0	133.6	110	4.34024	0	1.42	4	4.7	0.773	3173	2330	0	20.02	0	20.44	50.21	0	1.5	2	0	0	-5.42492	3	3.44485
Si	-4.081	-0.462	4.76681	-5.4254	4	2.1	12.06	47	1.11	150	0.54	45.1418	20.0164	64.50420054200542	1000	227	19.99	1687	100	0.68	0.40748040455120105	1	4	50.21	0.712	0	133.6	110	4.34024	0	1.42	4	4.7	0.773	3173	2330	0	20.02	0	20.44	50.21	0	1.5	2	0	0	-5.42492	3	3.44485
Si	-4.081	-0.462	4.76681	-5.4254	4	2.1	12.06	47	1.11	150	0.54	45.1418	20.0164	64.50420054200542	1000	227	19.99	1687	100	0.68	0.40748040455120105	1	4	50.21	0.712	0	133.6	110	4.34024	0	1.42	4	4.7	0.773	3173	2330	0	20.02	0	20.44	50.21	0	1.5	2	0	0	-5.42492	3	3.44485
Ge	-3.894	-0.529	4.55045	-4.2881	4	2.11	13.63	78	1.25	60	0.67	45.7155	22.661	64.50420054200542	1900	225	23.222	1211.4	129.03490683229813	0.72	0.16	1	4	36.94	0.32	0	119	114	4.51468	0	1.56	4	4.55	0.383	3093	5323	0	22.23	0	23.005	36.94	0	1.37	2	0	0	-4.61604	4	3.58331
Ge	-3.894	-0.529	4.55045	-4.2881	4	2.11	13.63	78	1.25	60	0.67	45.7155	22.661	64.50420054200542	1900	225	23.222	1211.4	129.03490683229813	0.72	0.16	1	4	36.94	0.32	0	119	114	4.51468	0	1.56	4	4.55	0.383	3093	5323	0	22.23	0	23.005	36.94	0	1.37	2	0	0	-4.61604	4	3.58331
Ge	-3.894	-0.529	4.55045	-4.2881	4	2.11	13.63	78	1.25	60	0.67	45.7155	22.661	64.50420054200542	1900	225	23.222	1211.4	129.03490683229813	0.72	0.16	1	4	36.94	0.32	0	119	114	4.51468	0	1.56	4	4.55	0.383	3093	5323	0	22.23	0	23.005	36.94	0	1.37	2	0	0	-4.61604	4	3.58331
Ge	-3.894	-0.529	4.55045	-4.2881	4	2.11	13.63	78	1.25	60	0.67	45.7155	22.661	64.50420054200542	1900	225	23.222	1211.4	129.03490683229813	0.72	0.16	1	4	36.94	0.32	0	119	114	4.51468	0	1.56	4	4.55	0.383	3093	5323	0	22.23	0	23.005	36.94	0	1.37	2	0	0	-4.61604	4	3.58331
Ge	-3.894	-0.529	4.55045	-4.2881	4	2.11	13.63	78	1.25	60	0.67	45.7155	22.661	64.50420054200542	1900	225	23.222	1211.4	129.03490683229813	0.72	0.16	1	4	36.94	0.32	0	119	114	4.51468	0	1.56	4	4.55	0.383	3093	5323	0	22.23	0	23.005	36.94	0	1.37	2	0	0	-4.61604	4	3.58331
Ge	-3.894	-0.529	4.55045	-4.2881	4	2.11	13.63	78	1.25	60	0.67	45.7155	22.661	64.50420054200542	1900	225	23.222	1211.4	129.03490683229813	0.72	0.16	1	4	36.94	0.32	0	119	114	4.51468	0	1.56	4	4.55	0.383	3093	5323	0	22.23	0	23.005	36.94	0	1.37	2	0	0	-4.61604	4	3.58331
Ge	-3.894	-0.529	4.55045	-4.2881	4	2.11	13.63	78	1.25	60	0.67	45.7155	22.661	64.50420054200542	1900	225	23.222	1211.4	129.03490683229813	0.72	0.16	1	4	36.94	0.32	0	119	114	4.51468	0	1.56	4	4.55	0.383	3093	5323	0	22.23	0	23.005	36.94	0	1.37	2	0	0	-4.61604	4	3.58331
Ge	-3.894	-0.529	4.55045	-4.2881	2	2.11	13.63	78	1.25	60	0.87	15.9346	22.661	64.50420054200542	1900	225	23.222	1211.4	129.03490683229813	0.72	0.16	1	4	36.94	0.32	0	119	114	4.51468	0	1.56	4	4.55	0.383	3093	5323	0	22.23	0	23.005	36.94	0	1.37	2	0	0	-4.61604	4	3.58331
Ge	-3.894	-0.529	4.55045	-4.2881	4	2.11	13.63	78	1.25	60	0.67	45.7155	22.661	64.50420054200542	1900	225	23.222	1211.4	129.03490683229813	0.72	0.16	1	4	36.94	0.32	0	119	114	4.51468	0	1.56	4	4.55	0.383	3093	5323	0	22.23	0	23.005	36.94	0	1.37	2	0	0	-4.61604	4	3.58331
Ge	-3.894	-0.529	4.55045	-4.2881	2	2.11	13.63	78	1.25	60	0.87	15.9346	22.661	64.50420054200542	1900	225	23.222	1211.4	129.03490683229813	0.72	0.16	1	4	36.94	0.32	0	119	114	4.51468	0	1.56	4	4.55	0.383	3093	5323	0	22.23	0	23.005	36.94	0	1.37	2	0	0	-4.61604	4	3.58331
Ge	-3.894	-0.529	4.55045	-4.2881	4	2.11	13.63	78	1.25	60	0.67	45.7155	22.661	64.50420054200542	1900	225	23.222	1211.4	129.03490683229813	0.72	0.16	1	4	36.94	0.32	0	119	114	4.51468	0	1.56	4	4.55	0.383	3093	5323	0	22.23	0	23.005	36.94	0	1.37	2	0	0	-4.61604	4	3.58331
Ge	-3.894	-0.529	4.55045	-4.2881	2	2.11	13.63	78	1.25	60	0.87	15.9346	22.661	64.50420054200542	1900	225	23.222	1211.4	129.03490683229813	0.72	0.16	1	4	36.94	0.32	0	119	114	4.51468	0	1.56	4	4.55	0.383	3093	5323	0	22.23	0	23.005	36.94	0	1.37	2	0	0	-4.61604	4	3.58331
Ge	-3.894	-0.529	4.55045	-4.2881	2	2.11	13.63	78	1.25	60	0.87	15.9346	22.661	64.50420054200542	1900	225	23.222	1211.4	129.03490683229813	0.72	0.16	1	4	36.94	0.32	0	119	114	4.51468	0	1.56	4	4.55	0.383	3093	5323	0	22.23	0	23.005	36.94	0	1.37	2	0	0	-4.61604	4	3.58331
Ge	-3.894	-0.529	4.55045	-4.2881	4	2.11	13.63	78	1.25	60	0.67	45.7155	22.661	64.50420054200542	1900	225	23.222	1211.4	129.03490683229813	0.72	0.16	1	4	36.94	0.32	0	119	114	4.51468	0	1.56	4	4.55	0.383	3093	5323	0	22.23	0	23.005	36.94	0	1.37	2	0	0	-4.61604	4	3.58331
Ge	-3.894	-0.529	4.55045	-4.2881	2	2.11	13.63	78	1.25	60	0.87	15.9346	22.661	64.50420054200542	1900	225	23.222	1211.4	129.03490683229813	0.72	0.16	1	4	36.94	0.32	0	119	114	4.51468	0	1.56	4	4.55	0.383	3093	5323	0	22.23	0	23.005	36.94	0	1.37	2	0	0	-4.61604	4	3.58331
Ge	-3.894	-0.529	4.55045	-4.2881	2	2.11	13.63	78	1.25	60	0.87	15.9346	22.661	64.50420054200542	1900	225	23.222	1211.4	129.03490683229813	0.72	0.16	1	4	36.94	0.32	0	119	114	4.51468	0	1.56	4	4.55	0.383	3093	5323	0	22.23	0	23.005	36.94	0	1.37	2	0	0	-4.61604	4	3.58331
Ge	-3.894	-0.529	4.55045	-4.2881	2	2.11	13.63	78	1.25	60	0.87	15.9346	22.661	64.50420054200542	1900	225	23.222	1211.4	129.03490683229813	0.72	0.16	1	4	36.94	0.32	0	119	114	4.51468	0	1.56	4	4.55	0.383	3093	5323	0	22.23	0	23.005	36.94	0	1.37	2	0	0	-4.61604	4	3.58331
Ge	-3.894	-0.529	4.55045	-4.2881	2	2.11	13.63	78	1.25	60	0.87	15.9346	22.661	64.50420054200542	1900	225	23.222	1211.4	129.03490683229813	0.72	0.16	1	4	36.94	0.32	0	119	114	4.51468	0	1.56	4	4.55	0.383	3093	5323	0	22.23	0	23.005	36.94	0	1.37	2	0	0	-4.61604	4	3.58331
Ge	-3.894	-0.529	4.55045	-4.2881	4	2.11	13.63	78	1.25	60	0.67	45.7155	22.661	64.50420054200542	1900	225	23.222	1211.4	129.03490683229813	0.72	0.16	1	4	36.94	0.32	0	119	114	4.51468	0	1.56	4	4.55	0.383	3093	5323	0	22.23	0	23.005	36.94	0	1.37	2	0	0	-4.61604	4	3.58331
Ge	-3.894	-0.529	4.55045	-4.2881	2	2.11	13.63	78	1.25	60	0.87	15.9346	22.661	64.50420054200542	1900	225	23.222	1211.4	129.03490683229813	0.72	0.16	1	4	36.94	0.32	0	119	114	4.51468	0	1.56	4	4.55	0.383	3093	5323	0	22.23	0	23.005	36.94	0	1.37	2	0	0	-4.61604	4	3.58331
Ge	-3.894	-0.529	4.55045	-4.2881	2	2.11	13.63	78	1.25	60	0.87	15.9346	22.661	64.50420054200542	1900	225	23.222	1211.4	129.03490683229813	0.72	0.16	1	4	36.94	0.32	0	119	114	4.51468	0	1.56	4	4.55	0.383	3093	5323	0	22.23	0	23.005	36.94	0	1.37	2	0	0	-4.61604	4	3.58331
Ge	-3.894	-0.529	4.55045	-4.2881	4	2.11	13.63	78	1.25	60	0.67	45.7155	22.661	64.50420054200542	1900	225	23.222	1211.4	129.03490683229813	0.72	0.16	1	4	36.94	0.32	0	119	114	4.51468	0	1.56	4	4.55	0.383	3093	5323	0	22.23	0	23.005	36.94	0	1.37	2	0	0	-4.61604	4	3.58331
Ge	-3.894	-0.529	4.55045	-4.2881	2	2.11	13.63	78	1.25	60	0.87	15.9346	22.661	64.50420054200542	1900	225	23.222	1211.4	129.03490683229813	0.72	0.16	1	4	36.94	0.32	0	119	114	4.51468	0	1.56	4	4.55	0.383	3093	5323	0	22.23	0	23.005	36.94	0	1.37	2	0	0	-4.61604	4	3.58331
Sn	-3.693	-0.54	4.2732	-4.0094	4	2.17	16.29	50	1.45	67	0.83	40.74	26.9668	18	1600	141	26.99	505.08	58	0.88	0.345	0	4	7.15	0.227	0	107.3	155	5.10626	0	1.88	4	4.15	0	2875	7310	0	27.05	0	33.285	7.15	0	1.24	2	0	0	-3.96105	5	4.05284
Sn	-3.693	-0.54	4.2732	-4.0094	4	2.17	16.29	50	1.45	67	0.83	40.74	26.9668	18	1600	141	26.99	505.08	58	0.88	0.345	0	4	7.15	0.227	0	107.3	155	5.10626	0	1.88	4	4.15	0	2875	7310	0	27.05	0	33.285	7.15	0	1.24	2	0	0	-3.96105	5	4.05284
Sn	-3.693	-0.54	4.2732	-4.0094	4	2.17	16.29	50	1.45	67	0.83	40.74	26.9668	18	1600	141	26.99	505.08	58	0.88	0.345	0	4	7.15	0.227	0	107.3	155	5.10626	0	1.88	4	4.15	0	2875	7310	0	27.05	0	33.285	7.15	0	1.24	2	0	0	-3.96105	5	4.05284
Sn	-3.693	-0.54	4.2732	-4.0094	4	2.17	16.29	50	1.45	67	0.83	40.74	26.9668	18	1600	141	26.99	505.08	58	0.88	0.345	0	4	7.15	0.227	0	107.3	155	5.10626	0	1.88	4	4.15	0	2875	7310	0	27.05	0	33.285	7.15	0	1.24	2	0	0	-3.96105	5	4.05284
Sn	-3.693	-0.54	4.2732	-4.0094	4	2.17	16.29	50	1.45	67	0.83	40.74	26.9668	18	1600	141	26.99	505.08	58	0.88	0.345	0	4	7.15	0.227	0	107.3	155	5.10626	0	1.88	4	4.15	0	2875	7310	0	27.05	0	33.285	7.15	0	1.24	2	0	0	-3.96105	5	4.05284
Sn	-3.693	-0.54	4.2732	-4.0094	4	2.17	16.29	50	1.45	67	0.83	40.74	26.9668	18	1600	141	26.99	505.08	58	0.88	0.345	0	4	7.15	0.227	0	107.3	155	5.10626	0	1.88	4	4.15	0	2875	7310	0	27.05	0	33.285	7.15	0	1.24	2	0	0	-3.96105	5	4.05284
Sn	-3.693	-0.54	4.2732	-4.0094	4	2.17	16.29	50	1.45	67	0.83	40.74	26.9668	18	1600	141	26.99	505.08	58	0.88	0.345	0	4	7.15	0.227	0	107.3	155	5.10626	0	1.88	4	4.15	0	2875	7310	0	27.05	0	33.285	7.15	0	1.24	2	0	0	-3.96105	5	4.05284
Sn	-3.693	-0.54	4.2732	-4.0094	4	2.17	16.29	50	1.45	67	0.83	40.74	26.9668	18	1600	141	26.99	505.08	58	0.88	0.345	0	4	7.15	0.227	0	107.3	155	5.10626	0	1.88	4	4.15	0	2875	7310	0	27.05	0	33.285	7.15	0	1.24	2	0	0	-3.96105	5	4.05284
Sn	-3.693	-0.54	4.2732	-4.0094	4	2.17	16.29	50	1.45	67	0.83	40.74	26.9668	18	1600	141	26.99	505.08	58	0.88	0.345	0	4	7.15	0.227	0	107.3	155	5.10626	0	1.88	4	4.15	0	2875	7310	0	27.05	0	33.285	7.15	0	1.24	2	0	0	-3.96105	5	4.05284
Sn	-3.693	-0.54	4.2732	-4.0094	4	2.17	16.29	50	1.45	67	0.83	40.74	26.9668	18	1600	141	26.99	505.08	58	0.88	0.345	0	4	7.15	0.227	0	107.3	155	5.10626	0	1.88	4	4.15	0	2875	7310	0	27.05	0	33.285	7.15	0	1.24	2	0	0	-3.96105	5	4.05284
Sn	-3.693	-0.54	4.2732	-4.0094	4	2.17	16.29	50	1.45	67	0.83	40.74	26.9668	18	1600	141	26.99	505.08	58	0.88	0.345	0	4	7.15	0.227	0	107.3	155	5.10626	0	1.88	4	4.15	0	2875	7310	0	27.05	0	33.285	7.15	0	1.24	2	0	0	-3.96105	5	4.05284
Sn	-3.693	-0.54	4.2732	-4.0094	4	2.17	16.29	50	1.45	67	0.83	40.74	26.9668	18	1600	141	26.99	505.08	58	0.88	0.345	0	4	7.15	0.227	0	107.3	155	5.10626	0	1.88	4	4.15	0	2875	7310	0	27.05	0	33.285	7.15	0	1.24	2	0	0	-3.96105	5	4.05284
Pb	-3.496	-0.642	3.88972	-3.71506	4	2.02	18.26	16	1.54	35	0.915	42.3326	30.3414	5.6	1800	225	24.7	600.61	46	0.96	0.45	0	4	4.774	0.13	0	35.1	174	4.82659	0	2.09	4	4.1	0	2022	11340	0	30.32	0	28.11	4.774	0	1.15	2	0	14	-3.62903	6	3.83087
Pb	-3.496	-0.642	3.88972	-3.71506	4	2.02	18.26	16	1.54	35	0.915	42.3326	30.3414	5.6	1800	225	24.7	600.61	46	0.96	0.45	0	4	4.774	0.13	0	35.1	174	4.82659	0	2.09	4	4.1	0	2022	11340	0	30.32	0	28.11	4.774	0	1.15	2	0	14	-3.62903	6	3.83087
Pb	-3.496	-0.642	3.88972	-3.71506	4	2.02	18.26	16	1.54	35	0.915	42.3326	30.3414	5.6	1800	225	24.7	600.61	46	0.96	0.45	0	4	4.774	0.13	0	35.1	174	4.82659	0	2.09	4	4.1	0	2022	11340	0	30.32	0	28.11	4.774	0	1.15	2	0	14	-3.62903	6	3.83087
Pb	-3.496	-0.642	3.88972	-3.71506	4	2.02	18.26	16	1.54	35	0.915	42.3326	30.3414	5.6	1800	225	24.7	600.61	46	0.96	0.45	0	4	4.774	0.13	0	35.1	174	4.82659	0	2.09	4	4.1	0	2022	11340	0	30.32	0	28.11	4.774	0	1.15	2	0	14	-3.62903	6	3.83087
Pb	-3.496	-0.642	3.88972	-3.71506	4	2.02	18.26	16	1.54	35	0.915	42.3326	30.3414	5.6	1800	225	24.7	600.61	46	0.96	0.45	0	4	4.774	0.13	0	35.1	174	4.82659	0	2.09	4	4.1	0	2022	11340	0	30.32	0	28.11	4.774	0	1.15	2	0	14	-3.62903	6	3.83087
Pb	-3.496	-0.642	3.88972	-3.71506	4	2.02	18.26	16	1.54	35	0.915	42.3326	30.3414	5.6	1800	225	24.7	600.61	46	0.96	0.45	0	4	4.774	0.13	0	35.1	174	4.82659	0	2.09	4	4.1	0	2022	11340	0	30.32	0	28.11	4.774	0	1.15	2	0	14	-3.62903	6	3.83087
Pb	-3.496	-0.642	3.88972	-3.71506	4	2.02	18.26	16	1.54	35	0.915	42.3326	30.3414	5.6	1800	225	24.7	600.61	46	0.96	0.45	0	4	4.774	0.13	0	35.1	174	4.82659	0	2.09	4	4.1	0	2022	11340	0	30.32	0	28.11	4.774	0	1.15	2	0	14	-3.62903	6	3.83087
Pb	-3.496	-0.642	3.88972	-3.71506	2	2.02	18.26	16	1.54	35	1.33	15.0325	30.3414	5.6	1800	225	24.7	600.61	46	0.96	0.45	0	4	4.774	0.13	0	35.1	174	4.82659	0	2.09	4	4.1	0	2022	11340	0	30.32	0	28.11	4.774	0	1.15	2	0	14	-3.62903	6	3.83087
Pb	-3.496	-0.642	3.88972	-3.71506	4	2.02	18.26	16	1.54	35	0.915	42.3326	30.3414	5.6	1800	225	24.7	600.61	46	0.96	0.45	0	4	4.774	0.13	0	35.1	174	4.82659	0	2.09	4	4.1	0	2022	11340	0	30.32	0	28.11	4.774	0	1.15	2	0	14	-3.62903	6	3.83087
Pb	-3.496	-0.642	3.88972	-3.71506	2	2.02	18.26	16	1.54	35	1.33	15.0325	30.3414	5.6	1800	225	24.7	600.61	46	0.96	0.45	0	4	4.774	0.13	0	35.1	174	4.82659	0	2.09	4	4.1	0	2022	11340	0	30.32	0	28.11	4.774	0	1.15	2	0	14	-3.62903	6	3.83087
Pb	-3.496	-0.642	3.88972	-3.71506	4	2.02	18.26	16	1.54	35	0.915	42.3326	30.3414	5.6	1800	225	24.7	600.61	46	0.96	0.45	0	4	4.774	0.13	0	35.1	174	4.82659	0	2.09	4	4.1	0	2022	11340	0	30.32	0	28.11	4.774	0	1.15	2	0	14	-3.62903	6	3.83087
Pb	-3.496	-0.642	3.88972	-3.71506	2	2.02	18.26	16	1.54	35	1.33	15.0325	30.3414	5.6	1800	225	24.7	600.61	46	0.96	0.45	0	4	4.774	0.13	0	35.1	174	4.82659	0	2.09	4	4.1	0	2022	11340	0	30.32	0	28.11	4.774	0	1.15	2	0	14	-3.62903	6	3.83087
Pb	-3.496	-0.642	3.88972	-3.71506	4	2.02	18.26	16	1.54	35	0.915	42.3326	30.3414	5.6	1800	225	24.7	600.61	46	0.96	0.45	0	4	4.774	0.13	0	35.1	174	4.82659	0	2.09	4	4.1	0	2022	11340	0	30.32	0	28.11	4.774	0	1.15	2	0	14	-3.62903	6	3.83087
Pb	-3.496	-0.642	3.88972	-3.71506	2	2.02	18.26	16	1.54	35	1.33	15.0325	30.3414	5.6	1800	225	24.7	600.61	46	0.96	0.45	0	4	4.774	0.13	0	35.1	174	4.82659	0	2.09	4	4.1	0	2022	11340	0	30.32	0	28.11	4.774	0	1.15	2	0	14	-3.62903	6	3.83087
Pb	-3.496	-0.642	3.88972	-3.71506	2	2.02	18.26	16	1.54	35	1.33	15.0325	30.3414	5.6	1800	225	24.7	600.61	46	0.96	0.45	0	4	4.774	0.13	0	35.1	174	4.82659	0	2.09	4	4.1	0	2022	11340	0	30.32	0	28.11	4.774	0	1.15	2	0	14	-3.62903	6	3.83087
Pb	-3.496	-0.642	3.88972	-3.71506	2	2.02	18.26	16	1.54	35	1.33	15.0325	30.3414	5.6	1800	225	24.7	600.61	46	0.96	0.45	0	4	4.774	0.13	0	35.1	174	4.82659	0	2.09	4	4.1	0	2022	11340	0	30.32	0	28.11	4.774	0	1.15	2	0	14	-3.62903	6	3.83087
Pb	-3.496	-0.642	3.88972	-3.71506	2	2.02	18.26	16	1.54	35	1.33	15.0325	30.3414	5.6	1800	225	24.7	600.61	46	0.96	0.45	0	4	4.774	0.13	0	35.1	174	4.82659	0	2.09	4	4.1	0	2022	11340	0	30.32	0	28.11	4.774	0	1.15	2	0	14	-3.62903	6	3.83087
Pb	-3.496	-0.642	3.88972	-3.71506	4	2.02	18.26	16	1.54	35	0.915	42.3326	30.3414	5.6	1800	225	24.7	600.61	46	0.96	0.45	0	4	4.774	0.13	0	35.1	174	4.82659	0	2.09	4	4.1	0	2022	11340	0	30.32	0	28.11	4.774	0	1.15	2	0	14	-3.62903	6	3.83087
Pb	-3.496	-0.642	3.88972	-3.71506	2	2.02	18.26	16	1.54	35	1.33	15.0325	30.3414	5.6	1800	225	24.7	600.61	46	0.96	0.45	0	4	4.774	0.13	0	35.1	174	4.82659	0	2.09	4	4.1	0	2022	11340	0	30.32	0	28.11	4.774	0	1.15	2	0	14	-3.62903	6	3.83087
Pb	-3.496	-0.642	3.88972	-3.71506	2	2.02	18.26	16	1.54	35	1.33	15.0325	30.3414	5.6	1800	225	24.7	600.61	46	0.96	0.45	0	4	4.774	0.13	0	35.1	174	4.82659	0	2.09	4	4.1	0	2022	11340	0	30.32	0	28.11	4.774	0	1.15	2	0	14	-3.62903	6	3.83087
Pb	-3.496	-0.642	3.88972	-3.71506	4	2.02	18.26	16	1.54	35	0.915	42.3326	30.3414	5.6	1800	225	24.7	600.61	46	0.96	0.45	0	4	4.774	0.13	0	35.1	174	4.82659	0	2.09	4	4.1	0	2022	11340	0	30.32	0	28.11	4.774	0	1.15	2	0	14	-3.62903	6	3.83087
Pb	-3.496	-0.642	3.88972	-3.71506	2	2.02	18.26	16	1.54	35	1.33	15.0325	30.3414	5.6	1800	225	24.7	600.61	46	0.96	0.45	0	4	4.774	0.13	0	35.1	174	4.82659	0	2.09	4	4.1	0	2022	11340	0	30.32	0	28.11	4.774	0	1.15	2	0	14	-3.62903	6	3.83087
P	-5.506	-0.451	5.61	-5.4098	5	1.8	17.02	78	0.98	0.236	0.52	65.0251	28.2141	64.50420054200542	5100	2	23.824	317.3	11	0.6	0.40748040455120105	0	3	18.54	0.769	0	72	102	4.48606	0	1.24	3	5.55	1.625	553.5	1823	0	18.99	0	22.5702	18.54	0	1.65	2	0	0	-5.40051	3	3.56059
P	-5.506	-0.451	5.61	-5.4098	3	1.8	17.02	78	0.98	0.236	0.58	30.2026	28.2141	64.50420054200542	5100	2	23.824	317.3	11	0.6	0.40748040455120105	0	3	18.54	0.769	0	72	102	4.48606	0	1.24	3	5.55	1.625	553.5	1823	0	18.99	0	22.5702	18.54	0	1.65	2	0	0	-5.40051	3	3.56059
P	-5.506	-0.451	5.61	-5.4098	3	1.8	17.02	78	0.98	0.236	0.58	30.2026	28.2141	64.50420054200542	5100	2	23.824	317.3	11	0.6	0.40748040455120105	0	3	18.54	0.769	0	72	102	4.48606	0	1.24	3	5.55	1.625	553.5	1823	0	18.99	0	22.5702	18.54	0	1.65	2	0	0	-5.40051	3	3.56059
P	-5.506	-0.451	5.61	-5.4098	3	1.8	17.02	78	0.98	0.236	0.58	30.2026	28.2141	64.50420054200542	5100	2	23.824	317.3	11	0.6	0.40748040455120105	0	3	18.54	0.769	0	72	102	4.48606	0	1.24	3	5.55	1.625	553.5	1823	0	18.99	0	22.5702	18.54	0	1.65	2	0	0	-5.40051	3	3.56059
P	-5.506	-0.451	5.61	-5.4098	3	1.8	17.02	78	0.98	0.236	0.58	30.2026	28.2141	64.50420054200542	5100	2	23.824	317.3	11	0.6	0.40748040455120105	0	3	18.54	0.769	0	72	102	4.48606	0	1.24	3	5.55	1.625	553.5	1823	0	18.99	0	22.5702	18.54	0	1.65	2	0	0	-5.40051	3	3.56059
P	-5.506	-0.451	5.61	-5.4098	3	1.8	17.02	78	0.98	0.236	0.58	30.2026	28.2141	64.50420054200542	5100	2	23.824	317.3	11	0.6	0.40748040455120105	0	3	18.54	0.769	0	72	102	4.48606	0	1.24	3	5.55	1.625	553.5	1823	0	18.99	0	22.5702	18.54	0	1.65	2	0	0	-5.40051	3	3.56059
P	-5.506	-0.451	5.61	-5.4098	3	1.8	17.02	78	0.98	0.236	0.58	30.2026	28.2141	64.50420054200542	5100	2	23.824	317.3	11	0.6	0.40748040455120105	0	3	18.54	0.769	0	72	102	4.48606	0	1.24	3	5.55	1.625	553.5	1823	0	18.99	0	22.5702	18.54	0	1.65	2	0	0	-5.40051	3	3.56059
P	-5.506	-0.451	5.61	-5.4098	3	1.8	17.02	78	0.98	0.236	0.58	30.2026	28.2141	64.50420054200542	5100	2	23.824	317.3	11	0.6	0.40748040455120105	0	3	18.54	0.769	0	72	102	4.48606	0	1.24	3	5.55	1.625	553.5	1823	0	18.99	0	22.5702	18.54	0	1.65	2	0	0	-5.40051	3	3.56059
P	-5.506	-0.451	5.61	-5.4098	5	1.8	17.02	78	0.98	0.236	0.52	65.0251	28.2141	64.50420054200542	5100	2	23.824	317.3	11	0.6	0.40748040455120105	0	3	18.54	0.769	0	72	102	4.48606	0	1.24	3	5.55	1.625	553.5	1823	0	18.99	0	22.5702	18.54	0	1.65	2	0	0	-5.40051	3	3.56059
P	-5.506	-0.451	5.61	-5.4098	3	1.8	17.02	78	0.98	0.236	0.58	30.2026	28.2141	64.50420054200542	5100	2	23.824	317.3	11	0.6	0.40748040455120105	0	3	18.54	0.769	0	72	102	4.48606	0	1.24	3	5.55	1.625	553.5	1823	0	18.99	0	22.5702	18.54	0	1.65	2	0	0	-5.40051	3	3.56059
P	-5.506	-0.451	5.61	-5.4098	3	1.8	17.02	78	0.98	0.236	0.58	30.2026	28.2141	64.50420054200542	5100	2	23.824	317.3	11	0.6	0.40748040455120105	0	3	18.54	0.769	0	72	102	4.48606	0	1.24	3	5.55	1.625	553.5	1823	0	18.99	0	22.5702	18.54	0	1.65	2	0	0	-5.40051	3	3.56059
P	-5.506	-0.451	5.61	-5.4098	5	1.8	17.02	78	0.98	0.236	0.52	65.0251	28.2141	64.50420054200542	5100	2	23.824	317.3	11	0.6	0.40748040455120105	0	3	18.54	0.769	0	72	102	4.48606	0	1.24	3	5.55	1.625	553.5	1823	0	18.99	0	22.5702	18.54	0	1.65	2	0	0	-5.40051	3	3.56059
P	-5.506	-0.451	5.61	-5.4098	3	1.8	17.02	78	0.98	0.236	0.58	30.2026	28.2141	64.50420054200542	5100	2	23.824	317.3	11	0.6	0.40748040455120105	0	3	18.54	0.769	0	72	102	4.48606	0	1.24	3	5.55	1.625	553.5	1823	0	18.99	0	22.5702	18.54	0	1.65	2	0	0	-5.40051	3	3.56059
P	-5.506	-0.451	5.61	-5.4098	3	1.8	17.02	78	0.98	0.236	0.58	30.2026	28.2141	64.50420054200542	5100	2	23.824	317.3	11	0.6	0.40748040455120105	0	3	18.54	0.769	0	72	102	4.48606	0	1.24	3	5.55	1.625	553.5	1823	0	18.99	0	22.5702	18.54	0	1.65	2	0	0	-5.40051	3	3.56059
P	-5.506	-0.451	5.61	-5.4098	5	1.8	17.02	78	0.98	0.236	0.52	65.0251	28.2141	64.50420054200542	5100	2	23.824	317.3	11	0.6	0.40748040455120105	0	3	18.54	0.769	0	72	102	4.48606	0	1.24	3	5.55	1.625	553.5	1823	0	18.99	0	22.5702	18.54	0	1.65	2	0	0	-5.40051	3	3.56059
P	-5.506	-0.451	5.61	-5.4098	3	1.8	17.02	78	0.98	0.236	0.58	30.2026	28.2141	64.50420054200542	5100	2	23.824	317.3	11	0.6	0.40748040455120105	0	3	18.54	0.769	0	72	102	4.48606	0	1.24	3	5.55	1.625	553.5	1823	0	18.99	0	22.5702	18.54	0	1.65	2	0	0	-5.40051	3	3.56059
P	-5.506	-0.451	5.61	-5.4098	5	1.8	17.02	78	0.98	0.236	0.52	65.0251	28.2141	64.50420054200542	5100	2	23.824	317.3	11	0.6	0.40748040455120105	0	3	18.54	0.769	0	72	102	4.48606	0	1.24	3	5.55	1.625	553.5	1823	0	18.99	0	22.5702	18.54	0	1.65	2	0	0	-5.40051	3	3.56059
P	-5.506	-0.451	5.61	-5.4098	5	1.8	17.02	78	0.98	0.236	0.52	65.0251	28.2141	64.50420054200542	5100	2	23.824	317.3	11	0.6	0.40748040455120105	0	3	18.54	0.769	0	72	102	4.48606	0	1.24	3	5.55	1.625	553.5	1823	0	18.99	0	22.5702	18.54	0	1.65	2	0	0	-5.40051	3	3.56059
P	-5.506	-0.451	5.61	-5.4098	5	1.8	17.02	78	0.98	0.236	0.52	65.0251	28.2141	64.50420054200542	5100	2	23.824	317.3	11	0.6	0.40748040455120105	0	3	18.54	0.769	0	72	102	4.48606	0	1.24	3	5.55	1.625	553.5	1823	0	18.99	0	22.5702	18.54	0	1.65	2	0	0	-5.40051	3	3.56059
P	-5.506	-0.451	5.61	-5.4098	3	1.8	17.02	78	0.98	0.236	0.58	30.2026	28.2141	64.50420054200542	5100	2	23.824	317.3	11	0.6	0.40748040455120105	0	3	18.54	0.769	0	72	102	4.48606	0	1.24	3	5.55	1.625	553.5	1823	0	18.99	0	22.5702	18.54	0	1.65	2	0	0	-5.40051	3	3.56059
P	-5.506	-0.451	5.61	-5.4098	3	1.8	17.02	78	0.98	0.236	0.58	30.2026	28.2141	64.50420054200542	5100	2	23.824	317.3	11	0.6	0.40748040455120105	0	3	18.54	0.769	0	72	102	4.48606	0	1.24	3	5.55	1.625	553.5	1823	0	18.99	0	22.5702	18.54	0	1.65	2	0	0	-5.40051	3	3.56059
P	-5.506	-0.451	5.61	-5.4098	3	1.8	17.02	78	0.98	0.236	0.58	30.2026	28.2141	64.50420054200542	5100	2	23.824	317.3	11	0.6	0.40748040455120105	0	3	18.54	0.769	0	72	102	4.48606	0	1.24	3	5.55	1.625	553.5	1823	0	18.99	0	22.5702	18.54	0	1.65	2	0	0	-5.40051	3	3.56059
P	-5.506	-0.451	5.61	-5.4098	3	1.8	17.02	78	0.98	0.236	0.58	30.2026	28.2141	64.50420054200542	5100	2	23.824	317.3	11	0.6	0.40748040455120105	0	3	18.54	0.769	0	72	102	4.48606	0	1.24	3	5.55	1.625	553.5	1823	0	18.99	0	22.5702	18.54	0	1.65	2	0	0	-5.40051	3	3.56059
P	-5.506	-0.451	5.61	-5.4098	3	1.8	17.02	78	0.98	0.236	0.58	30.2026	28.2141	64.50420054200542	5100	2	23.824	317.3	11	0.6	0.40748040455120105	0	3	18.54	0.769	0	72	102	4.48606	0	1.24	3	5.55	1.625	553.5	1823	0	18.99	0	22.5702	18.54	0	1.65	2	0	0	-5.40051	3	3.56059
P	-5.506	-0.451	5.61	-5.4098	3	1.8	17.02	78	0.98	0.236	0.58	30.2026	28.2141	64.50420054200542	5100	2	23.824	317.3	11	0.6	0.40748040455120105	0	3	18.54	0.769	0	72	102	4.48606	0	1.24	3	5.55	1.625	553.5	1823	0	18.99	0	22.5702	18.54	0	1.65	2	0	0	-5.40051	3	3.56059
As	-5.194	-0.532	5.30912	-4.65807	5	1.85	12.95	8	1.14	50	0.6	62.77	21.724	64.50420054200542	4000	166	24.64	1090	22	0.67	0.155	1	3	24.44	0.329	0	78	115	4.45972	0	1.415	3	4.8	0	887	5727	0	21.52	0	22.175	24.44	0	1.44	2	0	0	-4.65089	4	3.53968
As	-5.194	-0.532	5.30912	-4.65807	3	1.85	12.95	8	1.14	50	0.72	28.349	21.724	64.50420054200542	4000	166	24.64	1090	22	0.67	0.155	1	3	24.44	0.329	0	78	115	4.45972	0	1.415	3	4.8	0	887	5727	0	21.52	0	22.175	24.44	0	1.44	2	0	0	-4.65089	4	3.53968
As	-5.194	-0.532	5.30912	-4.65807	3	1.85	12.95	8	1.14	50	0.72	28.349	21.724	64.50420054200542	4000	166	24.64	1090	22	0.67	0.155	1	3	24.44	0.329	0	78	115	4.45972	0	1.415	3	4.8	0	887	5727	0	21.52	0	22.175	24.44	0	1.44	2	0	0	-4.65089	4	3.53968
As	-5.194	-0.532	5.30912	-4.65807	3	1.85	12.95	8	1.14	50	0.72	28.349	21.724	64.50420054200542	4000	166	24.64	1090	22	0.67	0.155	1	3	24.44	0.329	0	78	115	4.45972	0	1.415	3	4.8	0	887	5727	0	21.52	0	22.175	24.44	0	1.44	2	0	0	-4.65089	4	3.53968
As	-5.194	-0.532	5.30912	-4.65807	3	1.85	12.95	8	1.14	50	0.72	28.349	21.724	64.50420054200542	4000	166	24.64	1090	22	0.67	0.155	1	3	24.44	0.329	0	78	115	4.45972	0	1.415	3	4.8	0	887	5727	0	21.52	0	22.175	24.44	0	1.44	2	0	0	-4.65089	4	3.53968
As	-5.194	-0.532	5.30912	-4.65807	3	1.85	12.95	8	1.14	50	0.72	28.349	21.724	64.50420054200542	4000	166	24.64	1090	22	0.67	0.155	1	3	24.44	0.329	0	78	115	4.45972	0	1.415	3	4.8	0	887	5727	0	21.52	0	22.175	24.44	0	1.44	2	0	0	-4.65089	4	3.53968
As	-5.194	-0.532	5.30912	-4.65807	3	1.85	12.95	8	1.14	50	0.72	28.349	21.724	64.50420054200542	4000	166	24.64	1090	22	0.67	0.155	1	3	24.44	0.329	0	78	115	4.45972	0	1.415	3	4.8	0	887	5727	0	21.52	0	22.175	24.44	0	1.44	2	0	0	-4.65089	4	3.53968
As	-5.194	-0.532	5.30912	-4.65807	5	1.85	12.95	8	1.14	50	0.6	62.77	21.724	64.50420054200542	4000	166	24.64	1090	22	0.67	0.155	1	3	24.44	0.329	0	78	115	4.45972	0	1.415	3	4.8	0	887	5727	0	21.52	0	22.175	24.44	0	1.44	2	0	0	-4.65089	4	3.53968
As	-5.194	-0.532	5.30912	-4.65807	3	1.85	12.95	8	1.14	50	0.72	28.349	21.724	64.50420054200542	4000	166	24.64	1090	22	0.67	0.155	1	3	24.44	0.329	0	78	115	4.45972	0	1.415	3	4.8	0	887	5727	0	21.52	0	22.175	24.44	0	1.44	2	0	0	-4.65089	4	3.53968
As	-5.194	-0.532	5.30912	-4.65807	3	1.85	12.95	8	1.14	50	0.72	28.349	21.724	64.50420054200542	4000	166	24.64	1090	22	0.67	0.155	1	3	24.44	0.329	0	78	115	4.45972	0	1.415	3	4.8	0	887	5727	0	21.52	0	22.175	24.44	0	1.44	2	0	0	-4.65089	4	3.53968
As	-5.194	-0.532	5.30912	-4.65807	5	1.85	12.95	8	1.14	50	0.6	62.77	21.724	64.50420054200542	4000	166	24.64	1090	22	0.67	0.155	1	3	24.44	0.329	0	78	115	4.45972	0	1.415	3	4.8	0	887	5727	0	21.52	0	22.175	24.44	0	1.44	2	0	0	-4.65089	4	3.53968
As	-5.194	-0.532	5.30912	-4.65807	3	1.85	12.95	8	1.14	50	0.72	28.349	21.724	64.50420054200542	4000	166	24.64	1090	22	0.67	0.155	1	3	24.44	0.329	0	78	115	4.45972	0	1.415	3	4.8	0	887	5727	0	21.52	0	22.175	24.44	0	1.44	2	0	0	-4.65089	4	3.53968
As	-5.194	-0.532	5.30912	-4.65807	3	1.85	12.95	8	1.14	50	0.72	28.349	21.724	64.50420054200542	4000	166	24.64	1090	22	0.67	0.155	1	3	24.44	0.329	0	78	115	4.45972	0	1.415	3	4.8	0	887	5727	0	21.52	0	22.175	24.44	0	1.44	2	0	0	-4.65089	4	3.53968
As	-5.194	-0.532	5.30912	-4.65807	5	1.85	12.95	8	1.14	50	0.6	62.77	21.724	64.50420054200542	4000	166	24.64	1090	22	0.67	0.155	1	3	24.44	0.329	0	78	115	4.45972	0	1.415	3	4.8	0	887	5727	0	21.52	0	22.175	24.44	0	1.44	2	0	0	-4.65089	4	3.53968
As	-5.194	-0.532	5.30912	-4.65807	3	1.85	12.95	8	1.14	50	0.72	28.349	21.724	64.50420054200542	4000	166	24.64	1090	22	0.67	0.155	1	3	24.44	0.329	0	78	115	4.45972	0	1.415	3	4.8	0	887	5727	0	21.52	0	22.175	24.44	0	1.44	2	0	0	-4.65089	4	3.53968
As	-5.194	-0.532	5.30912	-4.65807	5	1.85	12.95	8	1.14	50	0.6	62.77	21.724	64.50420054200542	4000	166	24.64	1090	22	0.67	0.155	1	3	24.44	0.329	0	78	115	4.45972	0	1.415	3	4.8	0	887	5727	0	21.52	0	22.175	24.44	0	1.44	2	0	0	-4.65089	4	3.53968
As	-5.194	-0.532	5.30912	-4.65807	5	1.85	12.95	8	1.14	50	0.6	62.77	21.724	64.50420054200542	4000	166	24.64	1090	22	0.67	0.155	1	3	24.44	0.329	0	78	115	4.45972	0	1.415	3	4.8	0	887	5727	0	21.52	0	22.175	24.44	0	1.44	2	0	0	-4.65089	4	3.53968
As	-5.194	-0.532	5.30912	-4.65807	3	1.85	12.95	8	1.14	50	0.72	28.349	21.724	64.50420054200542	4000	166	24.64	1090	22	0.67	0.155	1	3	24.44	0.329	0	78	115	4.45972	0	1.415	3	4.8	0	887	5727	0	21.52	0	22.175	24.44	0	1.44	2	0	0	-4.65089	4	3.53968
As	-5.194	-0.532	5.30912	-4.65807	5	1.85	12.95	8	1.14	50	0.6	62.77	21.724	64.50420054200542	4000	166	24.64	1090	22	0.67	0.155	1	3	24.44	0.329	0	78	115	4.45972	0	1.415	3	4.8	0	887	5727	0	21.52	0	22.175	24.44	0	1.44	2	0	0	-4.65089	4	3.53968
As	-5.194	-0.532	5.30912	-4.65807	3	1.85	12.95	8	1.14	50	0.72	28.349	21.724	64.50420054200542	4000	166	24.64	1090	22	0.67	0.155	1	3	24.44	0.329	0	78	115	4.45972	0	1.415	3	4.8	0	887	5727	0	21.52	0	22.175	24.44	0	1.44	2	0	0	-4.65089	4	3.53968
As	-5.194	-0.532	5.30912	-4.65807	3	1.85	12.95	8	1.14	50	0.72	28.349	21.724	64.50420054200542	4000	166	24.64	1090	22	0.67	0.155	1	3	24.44	0.329	0	78	115	4.45972	0	1.415	3	4.8	0	887	5727	0	21.52	0	22.175	24.44	0	1.44	2	0	0	-4.65089	4	3.53968
As	-5.194	-0.532	5.30912	-4.65807	3	1.85	12.95	8	1.14	50	0.72	28.349	21.724	64.50420054200542	4000	166	24.64	1090	22	0.67	0.155	1	3	24.44	0.329	0	78	115	4.45972	0	1.415	3	4.8	0	887	5727	0	21.52	0	22.175	24.44	0	1.44	2	0	0	-4.65089	4	3.53968
As	-5.194	-0.532	5.30912	-4.65807	3	1.85	12.95	8	1.14	50	0.72	28.349	21.724	64.50420054200542	4000	166	24.64	1090	22	0.67	0.155	1	3	24.44	0.329	0	78	115	4.45972	0	1.415	3	4.8	0	887	5727	0	21.52	0	22.175	24.44	0	1.44	2	0	0	-4.65089	4	3.53968
As	-5.194	-0.532	5.30912	-4.65807	3	1.85	12.95	8	1.14	50	0.72	28.349	21.724	64.50420054200542	4000	166	24.64	1090	22	0.67	0.155	1	3	24.44	0.329	0	78	115	4.45972	0	1.415	3	4.8	0	887	5727	0	21.52	0	22.175	24.44	0	1.44	2	0	0	-4.65089	4	3.53968
Sb	-4.827	-0.556	4.84376	-4.12776	5	2.06	18.19	55	1.33	24	0.76	55	30.1914	20	3400	166	25.23	903.78	42	0.83	0.335	1	3	19.79	0.207	0	103.2	155	5.01648	0	1.765	3	4.4	0	1860	6697	0	30.21	0	31.56	19.79	0	1.26	2	0	0	-4.11736	5	3.98158
Sb	-4.827	-0.556	4.84376	-4.12776	3	2.06	18.19	55	1.33	24	0.9	25.3235	30.1914	20	3400	166	25.23	903.78	42	0.83	0.335	1	3	19.79	0.207	0	103.2	155	5.01648	0	1.765	3	4.4	0	1860	6697	0	30.21	0	31.56	19.79	0	1.26	2	0	0	-4.11736	5	3.98158
Sb	-4.827	-0.556	4.84376	-4.12776	3	2.06	18.19	55	1.33	24	0.9	25.3235	30.1914	20	3400	166	25.23	903.78	42	0.83	0.335	1	3	19.79	0.207	0	103.2	155	5.01648	0	1.765	3	4.4	0	1860	6697	0	30.21	0	31.56	19.79	0	1.26	2	0	0	-4.11736	5	3.98158
Sb	-4.827	-0.556	4.84376	-4.12776	3	2.06	18.19	55	1.33	24	0.9	25.3235	30.1914	20	3400	166	25.23	903.78	42	0.83	0.335	1	3	19.79	0.207	0	103.2	155	5.01648	0	1.765	3	4.4	0	1860	6697	0	30.21	0	31.56	19.79	0	1.26	2	0	0	-4.11736	5	3.98158
Sb	-4.827	-0.556	4.84376	-4.12776	3	2.06	18.19	55	1.33	24	0.9	25.3235	30.1914	20	3400	166	25.23	903.78	42	0.83	0.335	1	3	19.79	0.207	0	103.2	155	5.01648	0	1.765	3	4.4	0	1860	6697	0	30.21	0	31.56	19.79	0	1.26	2	0	0	-4.11736	5	3.98158
Sb	-4.827	-0.556	4.84376	-4.12776	3	2.06	18.19	55	1.33	24	0.9	25.3235	30.1914	20	3400	166	25.23	903.78	42	0.83	0.335	1	3	19.79	0.207	0	103.2	155	5.01648	0	1.765	3	4.4	0	1860	6697	0	30.21	0	31.56	19.79	0	1.26	2	0	0	-4.11736	5	3.98158
Sb	-4.827	-0.556	4.84376	-4.12776	3	2.06	18.19	55	1.33	24	0.9	25.3235	30.1914	20	3400	166	25.23	903.78	42	0.83	0.335	1	3	19.79	0.207	0	103.2	155	5.01648	0	1.765	3	4.4	0	1860	6697	0	30.21	0	31.56	19.79	0	1.26	2	0	0	-4.11736	5	3.98158
Sb	-4.827	-0.556	4.84376	-4.12776	3	2.06	18.19	55	1.33	24	0.9	25.3235	30.1914	20	3400	166	25.23	903.78	42	0.83	0.335	1	3	19.79	0.207	0	103.2	155	5.01648	0	1.765	3	4.4	0	1860	6697	0	30.21	0	31.56	19.79	0	1.26	2	0	0	-4.11736	5	3.98158
Sb	-4.827	-0.556	4.84376	-4.12776	5	2.06	18.19	55	1.33	24	0.76	55	30.1914	20	3400	166	25.23	903.78	42	0.83	0.335	1	3	19.79	0.207	0	103.2	155	5.01648	0	1.765	3	4.4	0	1860	6697	0	30.21	0	31.56	19.79	0	1.26	2	0	0	-4.11736	5	3.98158
Sb	-4.827	-0.556	4.84376	-4.12776	3	2.06	18.19	55	1.33	24	0.9	25.3235	30.1914	20	3400	166	25.23	903.78	42	0.83	0.335	1	3	19.79	0.207	0	103.2	155	5.01648	0	1.765	3	4.4	0	1860	6697	0	30.21	0	31.56	19.79	0	1.26	2	0	0	-4.11736	5	3.98158
Sb	-4.827	-0.556	4.84376	-4.12776	3	2.06	18.19	55	1.33	24	0.9	25.3235	30.1914	20	3400	166	25.23	903.78	42	0.83	0.335	1	3	19.79	0.207	0	103.2	155	5.01648	0	1.765	3	4.4	0	1860	6697	0	30.21	0	31.56	19.79	0	1.26	2	0	0	-4.11736	5	3.98158
Sb	-4.827	-0.556	4.84376	-4.12776	5	2.06	18.19	55	1.33	24	0.76	55	30.1914	20	3400	166	25.23	903.78	42	0.83	0.335	1	3	19.79	0.207	0	103.2	155	5.01648	0	1.765	3	4.4	0	1860	6697	0	30.21	0	31.56	19.79	0	1.26	2	0	0	-4.11736	5	3.98158
Sb	-4.827	-0.556	4.84376	-4.12776	3	2.06	18.19	55	1.33	24	0.9	25.3235	30.1914	20	3400	166	25.23	903.78	42	0.83	0.335	1	3	19.79	0.207	0	103.2	155	5.01648	0	1.765	3	4.4	0	1860	6697	0	30.21	0	31.56	19.79	0	1.26	2	0	0	-4.11736	5	3.98158
Sb	-4.827	-0.556	4.84376	-4.12776	3	2.06	18.19	55	1.33	24	0.9	25.3235	30.1914	20	3400	166	25.23	903.78	42	0.83	0.335	1	3	19.79	0.207	0	103.2	155	5.01648	0	1.765	3	4.4	0	1860	6697	0	30.21	0	31.56	19.79	0	1.26	2	0	0	-4.11736	5	3.98158
Sb	-4.827	-0.556	4.84376	-4.12776	5	2.06	18.19	55	1.33	24	0.76	55	30.1914	20	3400	166	25.23	903.78	42	0.83	0.335	1	3	19.79	0.207	0	103.2	155	5.01648	0	1.765	3	4.4	0	1860	6697	0	30.21	0	31.56	19.79	0	1.26	2	0	0	-4.11736	5	3.98158
Sb	-4.827	-0.556	4.84376	-4.12776	3	2.06	18.19	55	1.33	24	0.9	25.3235	30.1914	20	3400	166	25.23	903.78	42	0.83	0.335	1	3	19.79	0.207	0	103.2	155	5.01648	0	1.765	3	4.4	0	1860	6697	0	30.21	0	31.56	19.79	0	1.26	2	0	0	-4.11736	5	3.98158
Sb	-4.827	-0.556	4.84376	-4.12776	5	2.06	18.19	55	1.33	24	0.76	55	30.1914	20	3400	166	25.23	903.78	42	0.83	0.335	1	3	19.79	0.207	0	103.2	155	5.01648	0	1.765	3	4.4	0	1860	6697	0	30.21	0	31.56	19.79	0	1.26	2	0	0	-4.11736	5	3.98158
Sb	-4.827	-0.556	4.84376	-4.12776	5	2.06	18.19	55	1.33	24	0.76	55	30.1914	20	3400	166	25.23	903.78	42	0.83	0.335	1	3	19.79	0.207	0	103.2	155	5.01648	0	1.765	3	4.4	0	1860	6697	0	30.21	0	31.56	19.79	0	1.26	2	0	0	-4.11736	5	3.98158
Sb	-4.827	-0.556	4.84376	-4.12776	3	2.06	18.19	55	1.33	24	0.9	25.3235	30.1914	20	3400	166	25.23	903.78	42	0.83	0.335	1	3	19.79	0.207	0	103.2	155	5.01648	0	1.765	3	4.4	0	1860	6697	0	30.21	0	31.56	19.79	0	1.26	2	0	0	-4.11736	5	3.98158
Sb	-4.827	-0.556	4.84376	-4.12776	5	2.06	18.19	55	1.33	24	0.76	55	30.1914	20	3400	166	25.23	903.78	42	0.83	0.335	1	3	19.79	0.207	0	103.2	155	5.01648	0	1.765	3	4.4	0	1860	6697	0	30.21	0	31.56	19.79	0	1.26	2	0	0	-4.11736	5	3.98158
Sb	-4.827	-0.556	4.84376	-4.12776	3	2.06	18.19	55	1.33	24	0.9	25.3235	30.1914	20	3400	166	25.23	903.78	42	0.83	0.335	1	3	19.79	0.207	0	103.2	155	5.01648	0	1.765	3	4.4	0	1860	6697	0	30.21	0	31.56	19.79	0	1.26	2	0	0	-4.11736	5	3.98158
Sb	-4.827	-0.556	4.84376	-4.12776	3	2.06	18.19	55	1.33	24	0.9	25.3235	30.1914	20	3400	166	25.23	903.78	42	0.83	0.335	1	3	19.79	0.207	0	103.2	155	5.01648	0	1.765	3	4.4	0	1860	6697	0	30.21	0	31.56	19.79	0	1.26	2	0	0	-4.11736	5	3.98158
Sb	-4.827	-0.556	4.84376	-4.12776	3	2.06	18.19	55	1.33	24	0.9	25.3235	30.1914	20	3400	166	25.23	903.78	42	0.83	0.335	1	3	19.79	0.207	0	103.2	155	5.01648	0	1.765	3	4.4	0	1860	6697	0	30.21	0	31.56	19.79	0	1.26	2	0	0	-4.11736	5	3.98158
Sb	-4.827	-0.556	4.84376	-4.12776	3	2.06	18.19	55	1.33	24	0.9	25.3235	30.1914	20	3400	166	25.23	903.78	42	0.83	0.335	1	3	19.79	0.207	0	103.2	155	5.01648	0	1.765	3	4.4	0	1860	6697	0	30.21	0	31.56	19.79	0	1.26	2	0	0	-4.11736	5	3.98158
Bi	-4.57	-0.688	4.11774	-3.89824	3	2.07	21.31	32	1.43	8	1.17	25.5708	35.4835	12	6000	12	25.52	544.4	31	0.92	0.438	0	3	11.106	0.122	0	91.2	162	5.08907	0	1.997	3	4.15	0	1837	9780	0	35.38	0	32.95	11.106	0	1.16	2	0	14	-3.97369	6	4.0392
Bi	-4.57	-0.688	4.11774	-3.89824	3	2.07	21.31	32	1.43	8	1.17	25.5708	35.4835	12	6000	12	25.52	544.4	31	0.92	0.438	0	3	11.106	0.122	0	91.2	162	5.08907	0	1.997	3	4.15	0	1837	9780	0	35.38	0	32.95	11.106	0	1.16	2	0	14	-3.97369	6	4.0392
Bi	-4.57	-0.688	4.11774	-3.89824	3	2.07	21.31	32	1.43	8	1.17	25.5708	35.4835	12	6000	12	25.52	544.4	31	0.92	0.438	0	3	11.106	0.122	0	91.2	162	5.08907	0	1.997	3	4.15	0	1837	9780	0	35.38	0	32.95	11.106	0	1.16	2	0	14	-3.97369	6	4.0392
Bi	-4.57	-0.688	4.11774	-3.89824	3	2.07	21.31	32	1.43	8	1.17	25.5708	35.4835	12	6000	12	25.52	544.4	31	0.92	0.438	0	3	11.106	0.122	0	91.2	162	5.08907	0	1.997	3	4.15	0	1837	9780	0	35.38	0	32.95	11.106	0	1.16	2	0	14	-3.97369	6	4.0392
Bi	-4.57	-0.688	4.11774	-3.89824	3	2.07	21.31	32	1.43	8	1.17	25.5708	35.4835	12	6000	12	25.52	544.4	31	0.92	0.438	0	3	11.106	0.122	0	91.2	162	5.08907	0	1.997	3	4.15	0	1837	9780	0	35.38	0	32.95	11.106	0	1.16	2	0	14	-3.97369	6	4.0392
Bi	-4.57	-0.688	4.11774	-3.89824	3	2.07	21.31	32	1.43	8	1.17	25.5708	35.4835	12	6000	12	25.52	544.4	31	0.92	0.438	0	3	11.106	0.122	0	91.2	162	5.08907	0	1.997	3	4.15	0	1837	9780	0	35.38	0	32.95	11.106	0	1.16	2	0	14	-3.97369	6	4.0392
Bi	-4.57	-0.688	4.11774	-3.89824	3	2.07	21.31	32	1.43	8	1.17	25.5708	35.4835	12	6000	12	25.52	544.4	31	0.92	0.438	0	3	11.106	0.122	0	91.2	162	5.08907	0	1.997	3	4.15	0	1837	9780	0	35.38	0	32.95	11.106	0	1.16	2	0	14	-3.97369	6	4.0392
Bi	-4.57	-0.688	4.11774	-3.89824	3	2.07	21.31	32	1.43	8	1.17	25.5708	35.4835	12	6000	12	25.52	544.4	31	0.92	0.438	0	3	11.106	0.122	0	91.2	162	5.08907	0	1.997	3	4.15	0	1837	9780	0	35.38	0	32.95	11.106	0	1.16	2	0	14	-3.97369	6	4.0392
Bi	-4.57	-0.688	4.11774	-3.89824	3	2.07	21.31	32	1.43	8	1.17	25.5708	35.4835	12	6000	12	25.52	544.4	31	0.92	0.438	0	3	11.106	0.122	0	91.2	162	5.08907	0	1.997	3	4.15	0	1837	9780	0	35.38	0	32.95	11.106	0	1.16	2	0	14	-3.97369	6	4.0392
Bi	-4.57	-0.688	4.11774	-3.89824	3	2.07	21.31	32	1.43	8	1.17	25.5708	35.4835	12	6000	12	25.52	544.4	31	0.92	0.438	0	3	11.106	0.122	0	91.2	162	5.08907	0	1.997	3	4.15	0	1837	9780	0	35.38	0	32.95	11.106	0	1.16	2	0	14	-3.97369	6	4.0392
Bi	-4.57	-0.688	4.11774	-3.89824	3	2.07	21.31	32	1.43	8	1.17	25.5708	35.4835	12	6000	12	25.52	544.4	31	0.92	0.438	0	3	11.106	0.122	0	91.2	162	5.08907	0	1.997	3	4.15	0	1837	9780	0	35.38	0	32.95	11.106	0	1.16	2	0	14	-3.97369	6	4.0392
Bi	-4.57	-0.688	4.11774	-3.89824	3	2.07	21.31	32	1.43	8	1.17	25.5708	35.4835	12	6000	12	25.52	544.4	31	0.92	0.438	0	3	11.106	0.122	0	91.2	162	5.08907	0	1.997	3	4.15	0	1837	9780	0	35.38	0	32.95	11.106	0	1.16	2	0	14	-3.97369	6	4.0392
Bi	-4.57	-0.688	4.11774	-3.89824	3	2.07	21.31	32	1.43	8	1.17	25.5708	35.4835	12	6000	12	25.52	544.4	31	0.92	0.438	0	3	11.106	0.122	0	91.2	162	5.08907	0	1.997	3	4.15	0	1837	9780	0	35.38	0	32.95	11.106	0	1.16	2	0	14	-3.97369	6	4.0392
Bi	-4.57	-0.688	4.11774	-3.89824	3	2.07	21.31	32	1.43	8	1.17	25.5708	35.4835	12	6000	12	25.52	544.4	31	0.92	0.438	0	3	11.106	0.122	0	91.2	162	5.08907	0	1.997	3	4.15	0	1837	9780	0	35.38	0	32.95	11.106	0	1.16	2	0	14	-3.97369	6	4.0392
Bi	-4.57	-0.688	4.11774	-3.89824	3	2.07	21.31	32	1.43	8	1.17	25.5708	35.4835	12	6000	12	25.52	544.4	31	0.92	0.438	0	3	11.106	0.122	0	91.2	162	5.08907	0	1.997	3	4.15	0	1837	9780	0	35.38	0	32.95	11.106	0	1.16	2	0	14	-3.97369	6	4.0392
Bi	-4.57	-0.688	4.11774	-3.89824	3	2.07	21.31	32	1.43	8	1.17	25.5708	35.4835	12	6000	12	25.52	544.4	31	0.92	0.438	0	3	11.106	0.122	0	91.2	162	5.08907	0	1.997	3	4.15	0	1837	9780	0	35.38	0	32.95	11.106	0	1.16	2	0	14	-3.97369	6	4.0392
Bi	-4.57	-0.688	4.11774	-3.89824	3	2.07	21.31	32	1.43	8	1.17	25.5708	35.4835	12	6000	12	25.52	544.4	31	0.92	0.438	0	3	11.106	0.122	0	91.2	162	5.08907	0	1.997	3	4.15	0	1837	9780	0	35.38	0	32.95	11.106	0	1.16	2	0	14	-3.97369	6	4.0392
Bi	-4.57	-0.688	4.11774	-3.89824	3	2.07	21.31	32	1.43	8	1.17	25.5708	35.4835	12	6000	12	25.52	544.4	31	0.92	0.438	0	3	11.106	0.122	0	91.2	162	5.08907	0	1.997	3	4.15	0	1837	9780	0	35.38	0	32.95	11.106	0	1.16	2	0	14	-3.97369	6	4.0392
Te	-5.952	-0.56	5.48997	-3.14242	4	2.06	20.46	43	1.23	3	1.11	37.4155	33.9567	16	4900	152	25.73	722.66	65	0.79	0.325	1	2	17.38	0.202	0	190.2	140	5.18076	0	1.67	2	4.376600221483943	0.464	1261	6240	0	33.94	0	34.7633	17.38	0	1.4560686600221486	2	0	0	-3.1413	5	4.11198
Te	-5.952	-0.56	5.48997	-3.14242	4	2.06	20.46	43	1.23	3	1.11	37.4155	33.9567	16	4900	152	25.73	722.66	65	0.79	0.325	1	2	17.38	0.202	0	190.2	140	5.18076	0	1.67	2	4.376600221483943	0.464	1261	6240	0	33.94	0	34.7633	17.38	0	1.4560686600221486	2	0	0	-3.1413	5	4.11198
Te	-5.952	-0.56	5.48997	-3.14242	4	2.06	20.46	43	1.23	3	1.11	37.4155	33.9567	16	4900	152	25.73	722.66	65	0.79	0.325	1	2	17.38	0.202	0	190.2	140	5.18076	0	1.67	2	4.376600221483943	0.464	1261	6240	0	33.94	0	34.7633	17.38	0	1.4560686600221486	2	0	0	-3.1413	5	4.11198
Te	-5.952	-0.56	5.48997	-3.14242	4	2.06	20.46	43	1.23	3	1.11	37.4155	33.9567	16	4900	152	25.73	722.66	65	0.79	0.325	1	2	17.38	0.202	0	190.2	140	5.18076	0	1.67	2	4.376600221483943	0.464	1261	6240	0	33.94	0	34.7633	17.38	0	1.4560686600221486	2	0	0	-3.1413	5	4.11198
Te	-5.952	-0.56	5.48997	-3.14242	4	2.06	20.46	43	1.23	3	1.11	37.4155	33.9567	16	4900	152	25.73	722.66	65	0.79	0.325	1	2	17.38	0.202	0	190.2	140	5.18076	0	1.67	2	4.376600221483943	0.464	1261	6240	0	33.94	0	34.7633	17.38	0	1.4560686600221486	2	0	0	-3.1413	5	4.11198
Te	-5.952	-0.56	5.48997	-3.14242	4	2.06	20.46	43	1.23	3	1.11	37.4155	33.9567	16	4900	152	25.73	722.66	65	0.79	0.325	1	2	17.38	0.202	0	190.2	140	5.18076	0	1.67	2	4.376600221483943	0.464	1261	6240	0	33.94	0	34.7633	17.38	0	1.4560686600221486	2	0	0	-3.1413	5	4.11198
Te	-5.952	-0.56	5.48997	-3.14242	4	2.06	20.46	43	1.23	3	1.11	37.4155	33.9567	16	4900	152	25.73	722.66	65	0.79	0.325	1	2	17.38	0.202	0	190.2	140	5.18076	0	1.67	2	4.376600221483943	0.464	1261	6240	0	33.94	0	34.7633	17.38	0	1.4560686600221486	2	0	0	-3.1413	5	4.11198
Te	-5.952	-0.56	5.48997	-3.14242	4	2.06	20.46	43	1.23	3	1.11	37.4155	33.9567	16	4900	152	25.73	722.66	65	0.79	0.325	1	2	17.38	0.202	0	190.2	140	5.18076	0	1.67	2	4.376600221483943	0.464	1261	6240	0	33.94	0	34.7633	17.38	0	1.4560686600221486	2	0	0	-3.1413	5	4.11198
Te	-5.952	-0.56	5.48997	-3.14242	4	2.06	20.46	43	1.23	3	1.11	37.4155	33.9567	16	4900	152	25.73	722.66	65	0.79	0.325	1	2	17.38	0.202	0	190.2	140	5.18076	0	1.67	2	4.376600221483943	0.464	1261	6240	0	33.94	0	34.7633	17.38	0	1.4560686600221486	2	0	0	-3.1413	5	4.11198
Te	-5.952	-0.56	5.48997	-3.14242	4	2.06	20.46	43	1.23	3	1.11	37.4155	33.9567	16	4900	152	25.73	722.66	65	0.79	0.325	1	2	17.38	0.202	0	190.2	140	5.18076	0	1.67	2	4.376600221483943	0.464	1261	6240	0	33.94	0	34.7633	17.38	0	1.4560686600221486	2	0	0	-3.1413	5	4.11198
Te	-5.952	-0.56	5.48997	-3.14242	4	2.06	20.46	43	1.23	3	1.11	37.4155	33.9567	16	4900	152	25.73	722.66	65	0.79	0.325	1	2	17.38	0.202	0	190.2	140	5.18076	0	1.67	2	4.376600221483943	0.464	1261	6240	0	33.94	0	34.7633	17.38	0	1.4560686600221486	2	0	0	-3.1413	5	4.11198
Te	-5.952	-0.56	5.48997	-3.14242	4	2.06	20.46	43	1.23	3	1.11	37.4155	33.9567	16	4900	152	25.73	722.66	65	0.79	0.325	1	2	17.38	0.202	0	190.2	140	5.18076	0	1.67	2	4.376600221483943	0.464	1261	6240	0	33.94	0	34.7633	17.38	0	1.4560686600221486	2	0	0	-3.1413	5	4.11198
Te	-5.952	-0.56	5.48997	-3.14242	4	2.06	20.46	43	1.23	3	1.11	37.4155	33.9567	16	4900	152	25.73	722.66	65	0.79	0.325	1	2	17.38	0.202	0	190.2	140	5.18076	0	1.67	2	4.376600221483943	0.464	1261	6240	0	33.94	0	34.7633	17.38	0	1.4560686600221486	2	0	0	-3.1413	5	4.11198
Te	-5.952	-0.56	5.48997	-3.14242	4	2.06	20.46	43	1.23	3	1.11	37.4155	33.9567	16	4900	152	25.73	722.66	65	0.79	0.325	1	2	17.38	0.202	0	190.2	140	5.18076	0	1.67	2	4.376600221483943	0.464	1261	6240	0	33.94	0	34.7633	17.38	0	1.4560686600221486	2	0	0	-3.1413	5	4.11198
Te	-5.952	-0.56	5.48997	-3.14242	4	2.06	20.46	43	1.23	3	1.11	37.4155	33.9567	16	4900	152	25.73	722.66	65	0.79	0.325	1	2	17.38	0.202	0	190.2	140	5.18076	0	1.67	2	4.376600221483943	0.464	1261	6240	0	33.94	0	34.7633	17.38	0	1.4560686600221486	2	0	0	-3.1413	5	4.11198
Te	-5.952	-0.56	5.48997	-3.14242	4	2.06	20.46	43	1.23	3	1.11	37.4155	33.9567	16	4900	152	25.73	722.66	65	0.79	0.325	1	2	17.38	0.202	0	190.2	140	5.18076	0	1.67	2	4.376600221483943	0.464	1261	6240	0	33.94	0	34.7633	17.38	0	1.4560686600221486	2	0	0	-3.1413	5	4.11198
[truncated: 454 more columns]
